# Supplementary material for: In Vitro Whole Genome DNA Binding Analysis of the Bacterial Replication Initiator and Transcription Factor DnaA
Source: PubMed Central journal article supplement (PMC4447404; doi:10.1371/journal.pgen.1005258), 2015-05-28

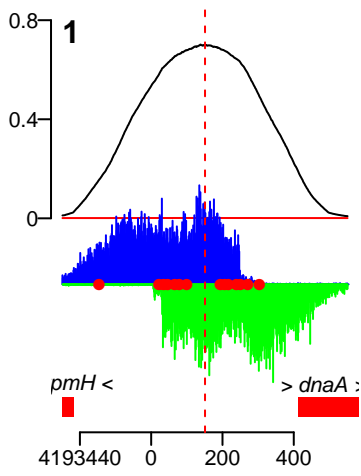

GTATCCACA 21 +  
TTATCGACA 34 +  
ATTTTCACA 45 +  
TTGTCCACA 65 -  
and 11 more

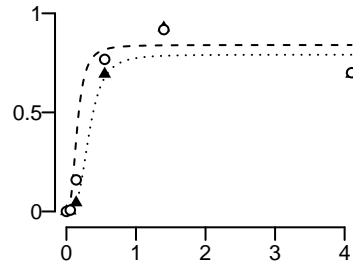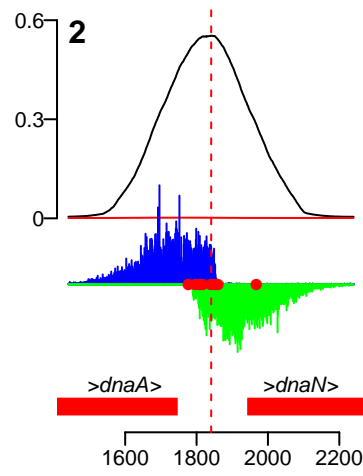

TTATTCACA 1777 -  
TCATACACA 1797 +  
CTGTCCACA 1808 +  
CTATCCACA 1817 -  
and 4 more

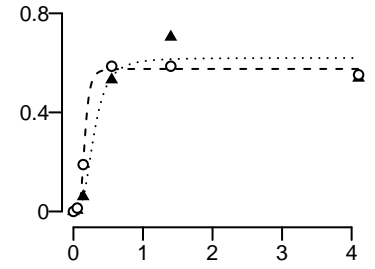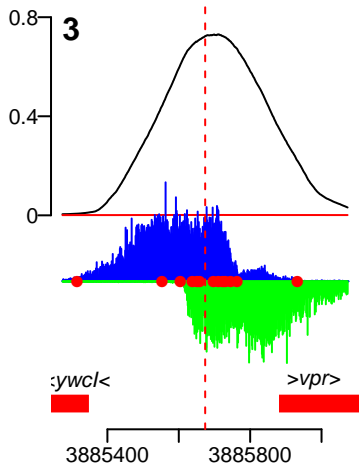

CCATCCACA 3885315 +  
CTTTCACA 3885553 -  
TTATACACA 3885605 +  
TTAATCACA 3885638 +  
and 9 more

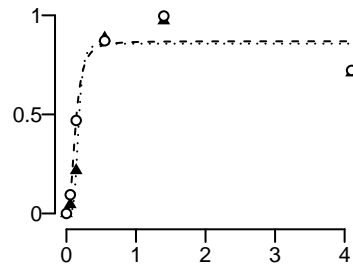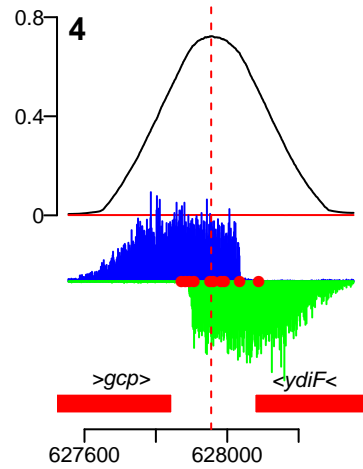

TTATTAACA 627872 +  
CAATTCACA 627883 +  
TTATCCACA 627894 +  
TTACTCACA 627907 -  
and 6 more

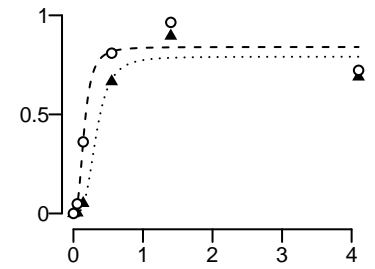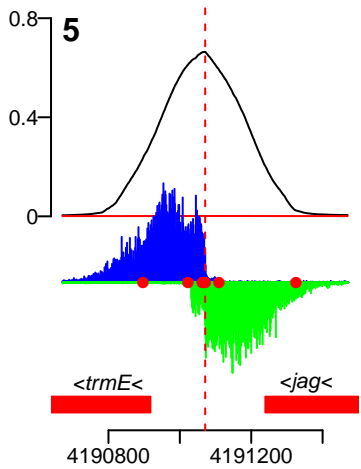

ATTTCCACA 4190897 -  
TTATCCACA 4191023 +  
TTATCCACA 4191063 +  
TTATTCACA 4191072 -  
and 2 more

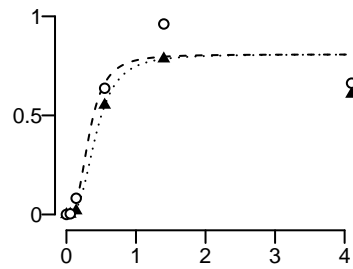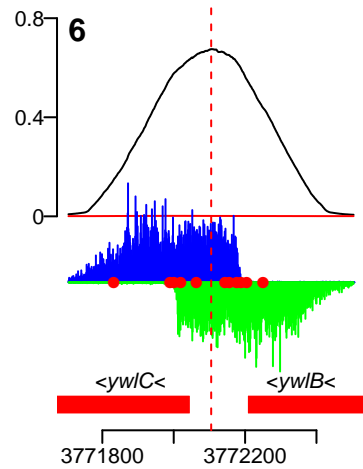

TTGTCCACA 3771832 -  
TGATCCACA 3771990 -  
TTATCCACA 3772001 -  
ACATCCACA 3772020 +  
and 7 more

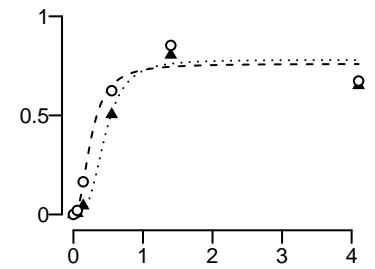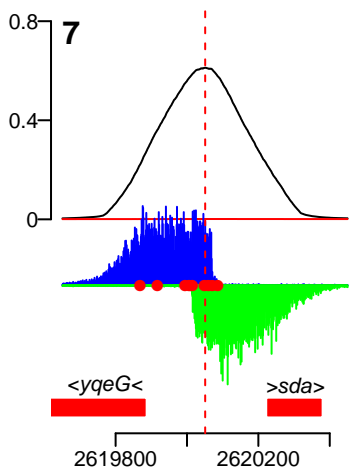

TTTTTAACA 2619869 +  
TTTTCGACA 2619917 -  
TTATCCACA 2619995 -  
TTACACACA 2620006 +  
and 5 more

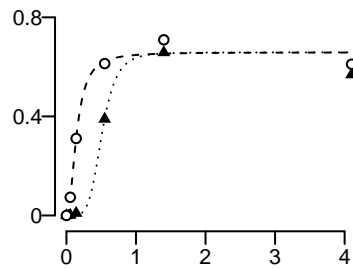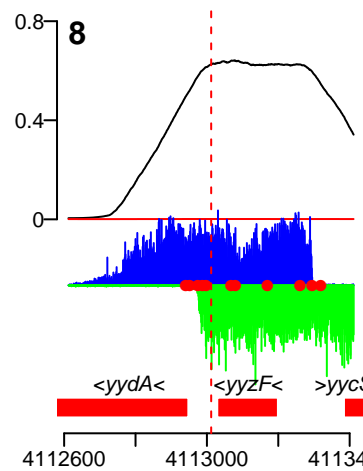

ATATTCACA 4112941 +  
TCATCCACA 4112952 +  
TTATTCACA 4112974 +  
TTGTCCACA 4112987 +  
and 7 more

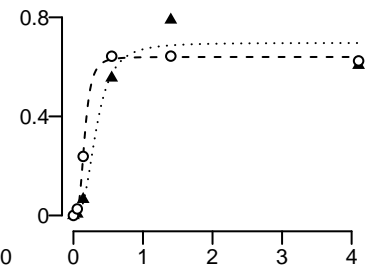

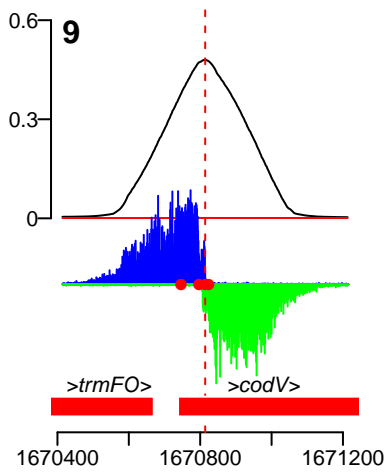

|           |         |   |
|-----------|---------|---|
| TTCTTAACA | 1670746 | - |
| TTATTCACA | 1670797 | + |
| TAATTCACA | 1670815 | - |
| GAATCCACA | 1670824 | - |

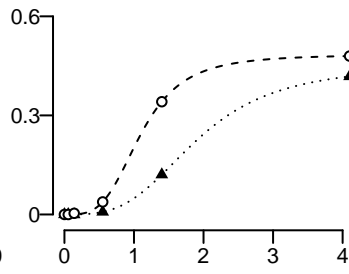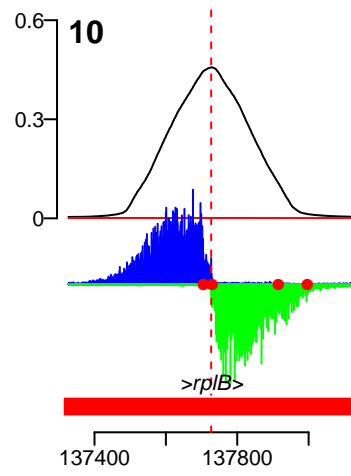

|           |        |   |
|-----------|--------|---|
| TTATCAACA | 137705 | + |
| TTATGCACA | 137730 | - |
| TTATCAACA | 137915 | + |
| TCACCCACA | 137997 | + |

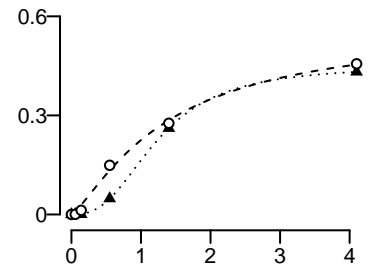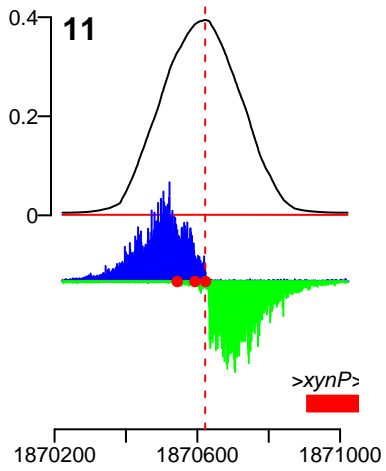

|           |         |   |
|-----------|---------|---|
| TTTTCAACA | 1870544 | - |
| TGATCAACA | 1870594 | + |
| TTATCCACA | 1870624 | + |

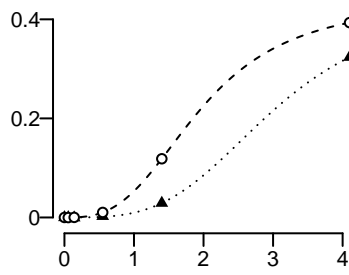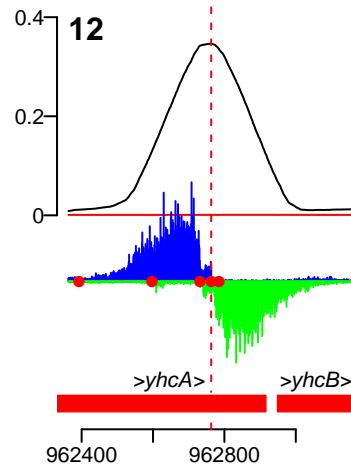

|           |        |   |
|-----------|--------|---|
| ATATACACA | 962393 | + |
| TTATTCACA | 962597 | + |
| TTATAAACA | 962732 | + |
| TTATCCCA  | 962764 | - |
| TTGCCACA  | 962785 | - |

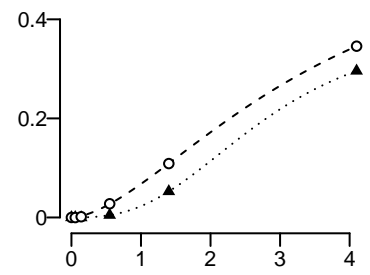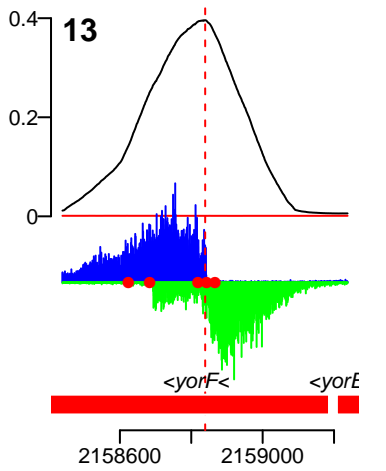

|           |         |   |
|-----------|---------|---|
| TTTTCAACA | 2158624 | + |
| TTGTACACA | 2158684 | + |
| CTGTTCACA | 2158819 | + |
| ATATCCACA | 2158843 | - |
| TTATTCACA | 2158867 | - |

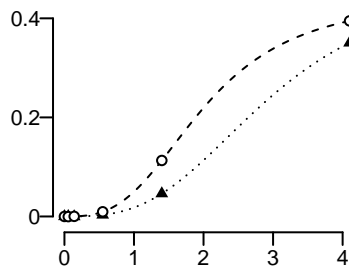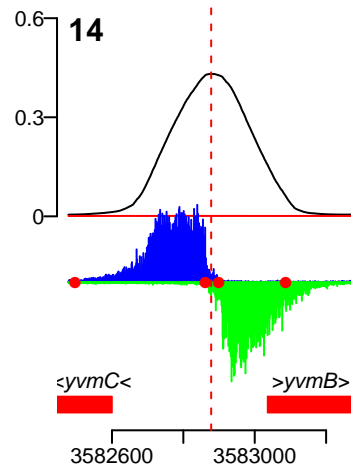

|           |         |   |
|-----------|---------|---|
| TGATCCCA  | 3582497 | + |
| TTTTCCACA | 3582862 | + |
| ATATCAACA | 3582899 | + |
| TAATGAACA | 3583087 | + |

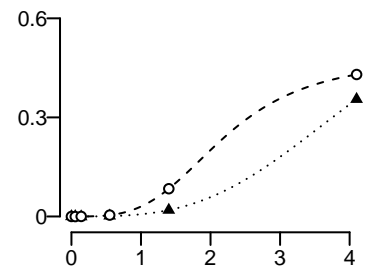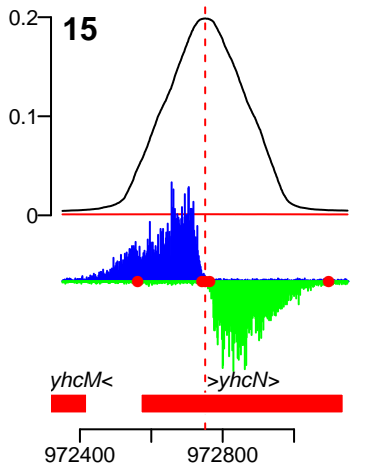

|           |        |   |
|-----------|--------|---|
| GAATTCACA | 972562 | + |
| TTGACAACA | 972742 | + |
| TCATTAACA | 972752 | - |
| TTATTGACA | 972764 | - |
| ATTACACA  | 973097 | + |

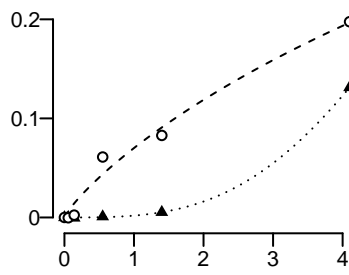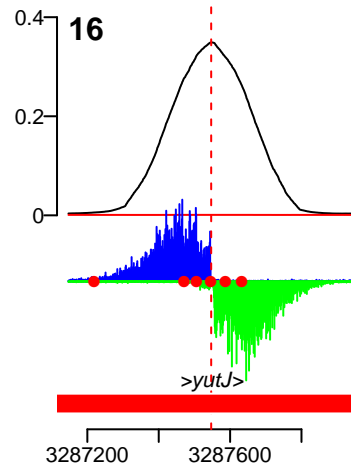

|            |         |   |
|------------|---------|---|
| TTATCCTCA  | 3287219 | - |
| TTTTGCACA  | 3287471 | - |
| TTATTAACA  | 3287506 | + |
| TTATCAACA  | 3287546 | - |
| and 2 more |         |   |

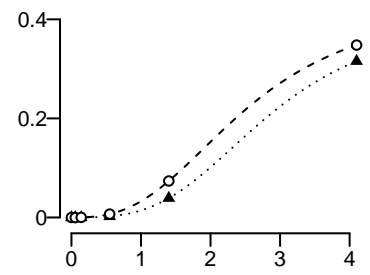

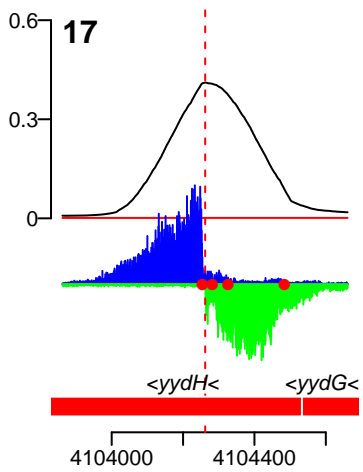

|            |         |   |
|------------|---------|---|
| TTATCCACA  | 4104254 | + |
| TTGTCCCTCA | 4104282 | - |
| ATATGAACA  | 4104326 | + |
| TTTTGCACA  | 4104484 | + |

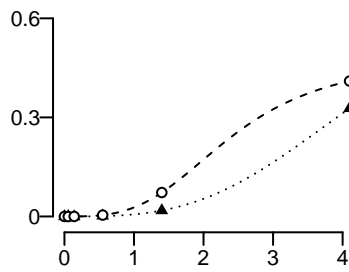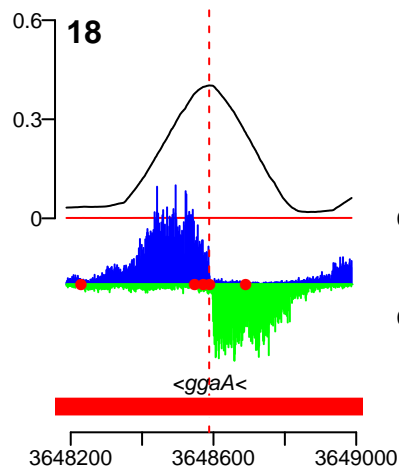

|           |         |   |
|-----------|---------|---|
| ATATCCCCA | 3648229 | + |
| TCATCAACA | 3648548 | - |
| AGATCAACA | 3648572 | - |
| TTATAAACA | 3648590 | + |
| CCATCAACA | 3648690 | + |

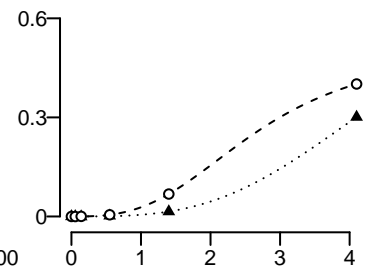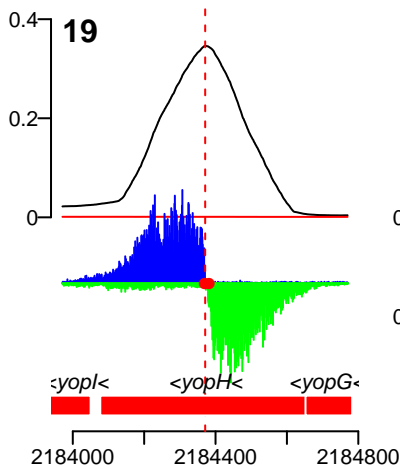

|           |         |   |
|-----------|---------|---|
| TTATCCCCA | 2184370 | + |
| TTATCCACC | 2184382 | + |

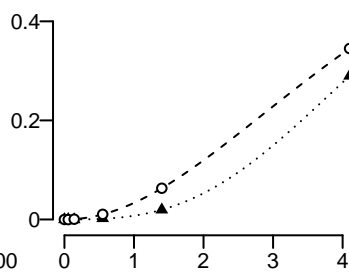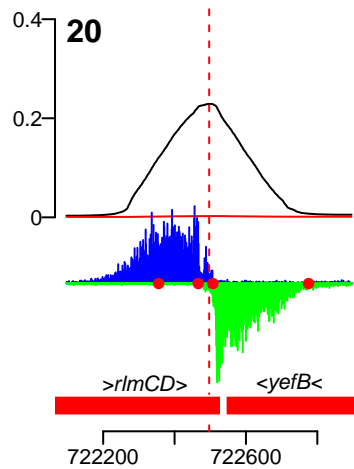

|           |        |   |
|-----------|--------|---|
| ATCTCCACA | 722356 | - |
| ATATCCACA | 722467 | - |
| TTATCAACA | 722508 | - |
| ATATCACCA | 722776 | - |

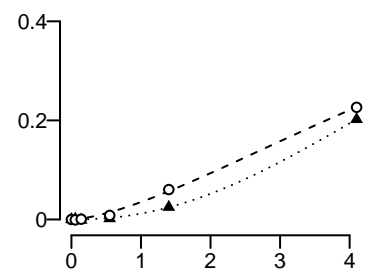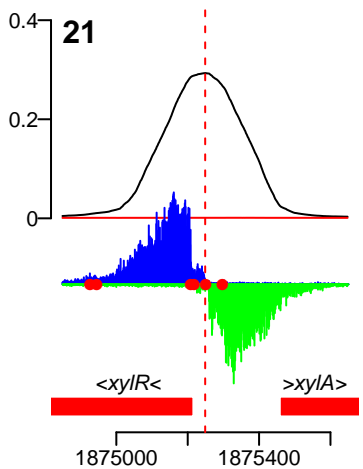

|            |         |   |
|------------|---------|---|
| ATTTAACA   | 1874926 | - |
| TAATCCACA  | 1874945 | + |
| ATATCCACT  | 1875209 | + |
| TCATCCACT  | 1875218 | + |
| and 2 more |         |   |

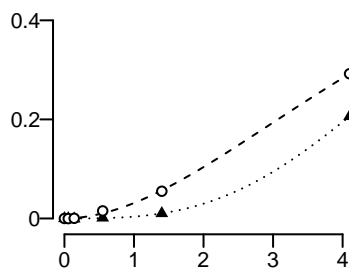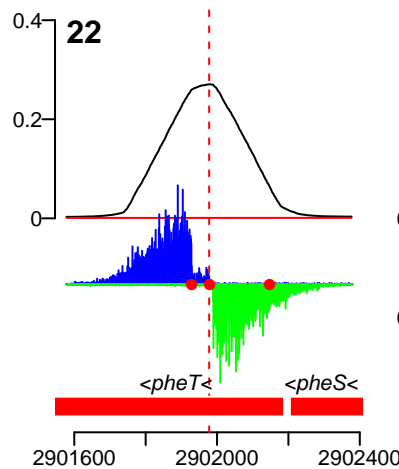

|           |         |   |
|-----------|---------|---|
| TTATCCACA | 2901929 | + |
| ATATCCACA | 2901980 | + |
| AAATCAACA | 2902148 | + |

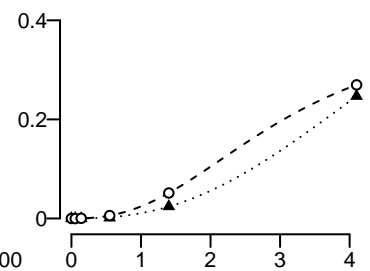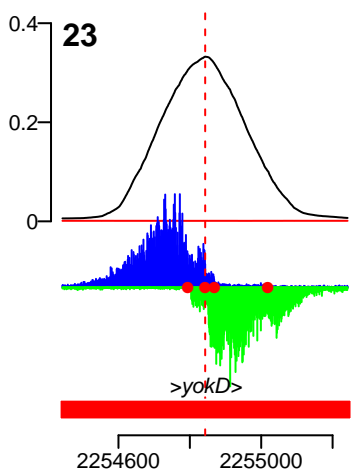

|           |         |   |
|-----------|---------|---|
| TTATCCAGA | 2254794 | + |
| TTTTCCCA  | 2254843 | - |
| TAATCAACA | 2254869 | + |
| TTATAAACA | 2255018 | + |

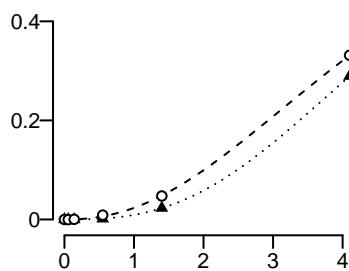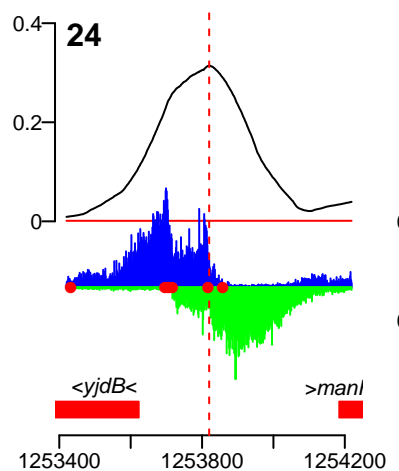

|            |         |   |
|------------|---------|---|
| TTTTTAACA  | 1253432 | + |
| TTATTTACA  | 1253696 | - |
| TTATTAACA  | 1253706 | - |
| TCGTTCAACA | 1253717 | - |
| and 2 more |         |   |

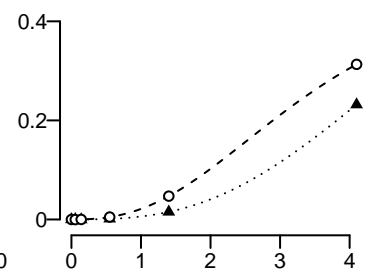

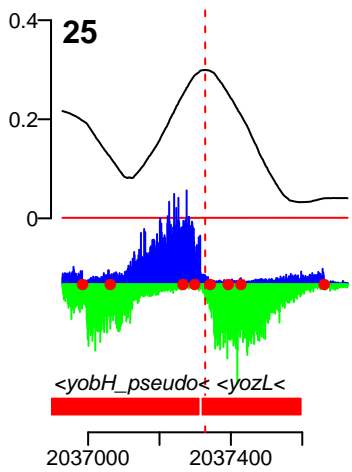

|            |         |   |
|------------|---------|---|
| GTGTCCACA  | 2036985 | - |
| AAATCCACA  | 2037062 | - |
| ATATCGACA  | 2037266 | + |
| TTACTCACA  | 2037299 | - |
| and 4 more |         |   |

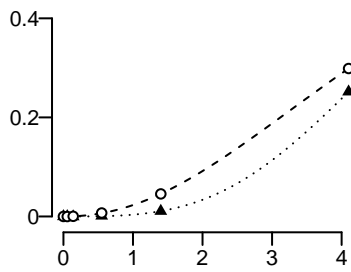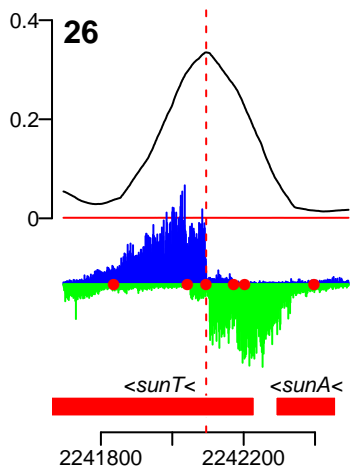

|            |         |   |
|------------|---------|---|
| AAATTCACA  | 2241836 | - |
| TTATCCCA   | 2242042 | + |
| TTATCCCA   | 2242095 | + |
| TAGTCCACA  | 2242172 | + |
| and 2 more |         |   |

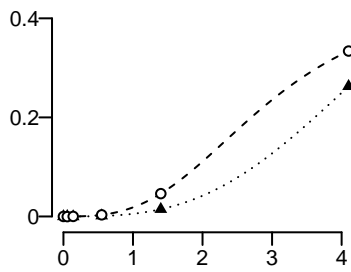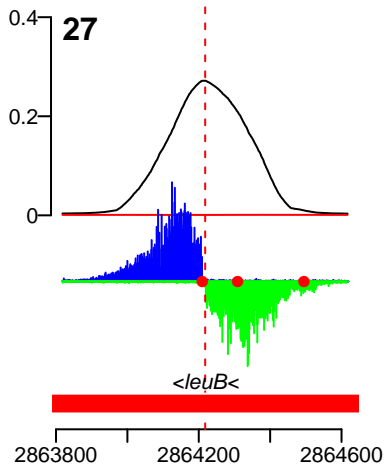

|           |         |   |
|-----------|---------|---|
| TTATCCACA | 2864210 | + |
| TTATCTACA | 2864309 | + |
| AAATCAACA | 2864495 | + |

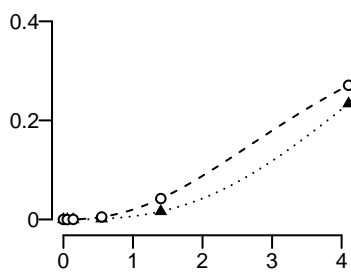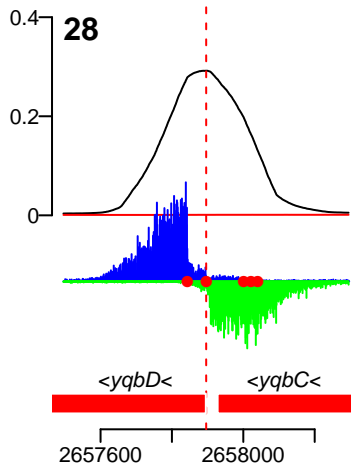

|           |         |   |
|-----------|---------|---|
| TTATCCACA | 2657843 | + |
| TTATCCACC | 2657897 | + |
| TTATCTACA | 2658001 | + |
| TTATTCATA | 2658022 | + |
| TATTCACA  | 2658040 | - |

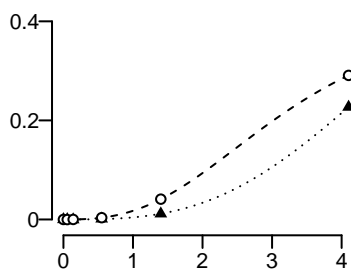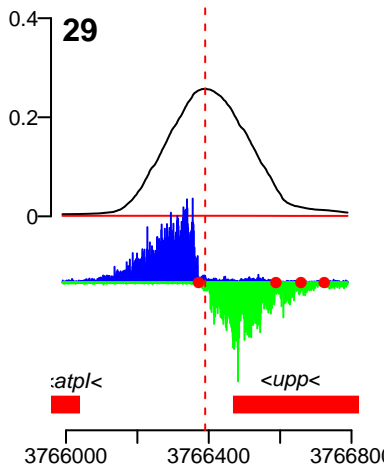

|            |         |   |
|------------|---------|---|
| ATGTTCAACA | 3766372 | + |
| TCTTCCACA  | 3766589 | + |
| CCATTCACA  | 3766659 | - |
| TCTTCCACA  | 3766724 | + |

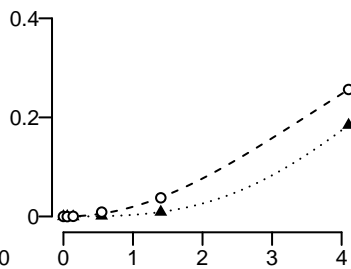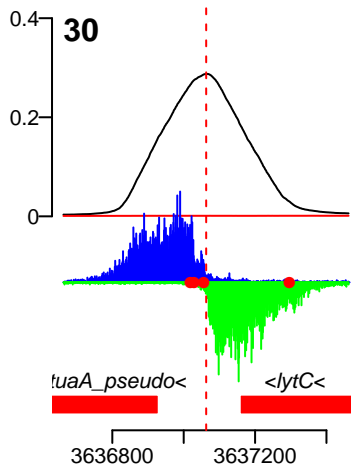

|           |         |   |
|-----------|---------|---|
| TTCTTAACA | 3637019 | - |
| TAATTCACA | 3637029 | - |
| TTAACACA  | 3637056 | - |
| TTAATAACA | 3637296 | + |

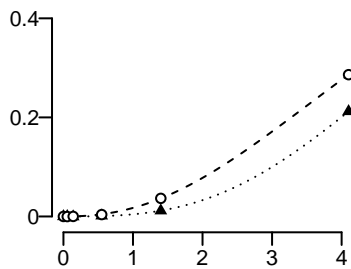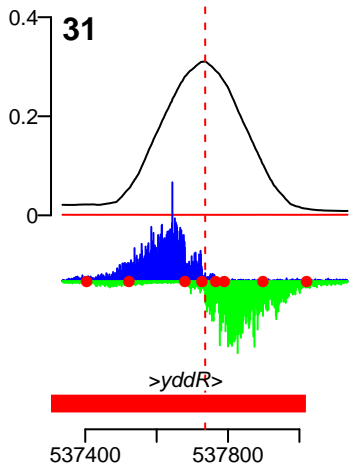

|            |        |   |
|------------|--------|---|
| TTGCCAACA  | 537404 | + |
| TTTTGAACA  | 537523 | - |
| TAATCCACA  | 537680 | - |
| GTATCCCA   | 537727 | - |
| and 4 more |        |   |

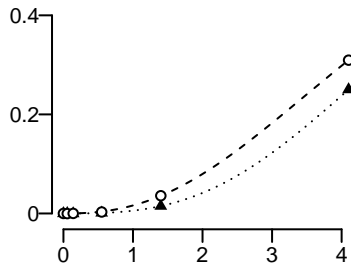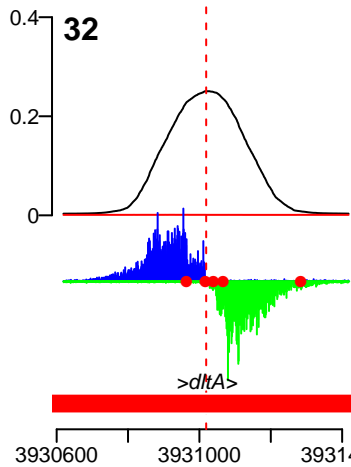

|           |         |   |
|-----------|---------|---|
| TTATTCACA | 3930964 | - |
| ATGTCCACA | 3931017 | - |
| ATTTGCACA | 3931039 | - |
| TTTTTCACA | 3931066 | + |
| ATATGAACA | 3931284 | + |

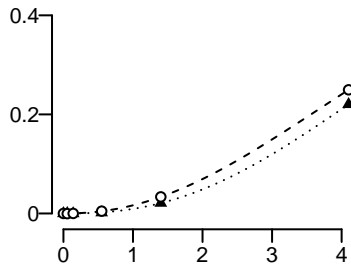

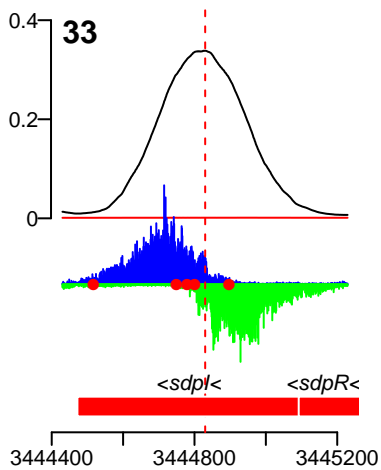

|           |         |   |
|-----------|---------|---|
| ATTTCAACA | 3444517 | - |
| ATACCAACA | 3444749 | + |
| ATATTCACT | 3444779 | + |
| TTATCAATA | 3444801 | + |
| TAGTTAACA | 3444897 | + |

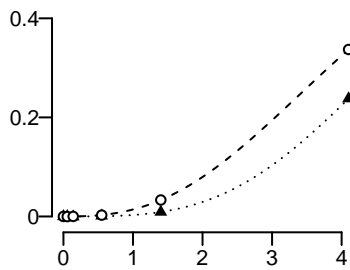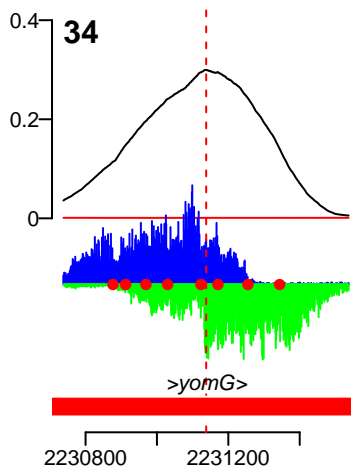

|            |         |   |
|------------|---------|---|
| ATATCAACA  | 2230877 | - |
| CTATTAACA  | 2230913 | - |
| TTATTAACA  | 2230970 | - |
| TGATCAACA  | 2231030 | + |
| and 4 more |         |   |

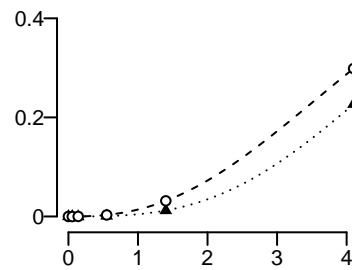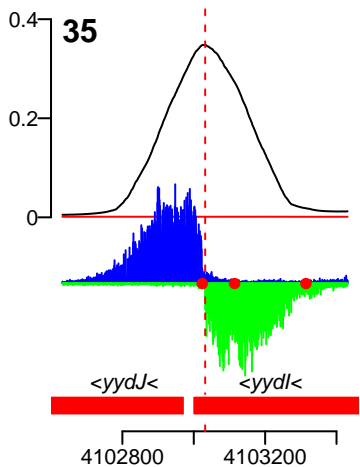

|           |         |   |
|-----------|---------|---|
| TTATCCACT | 4103024 | + |
| TCATCAACA | 4103115 | - |
| TTATCCAGA | 4103315 | + |

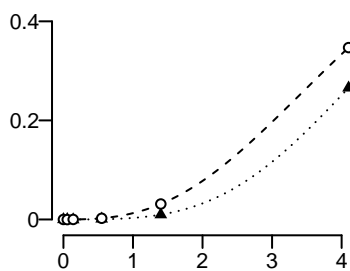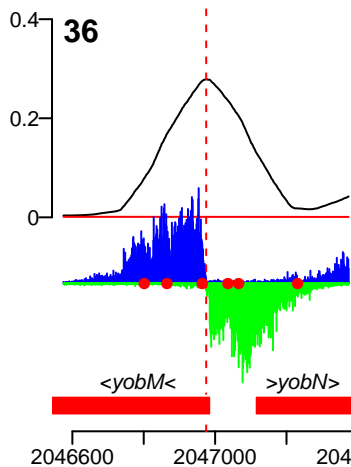

|            |         |   |
|------------|---------|---|
| CCTTCACA   | 2046802 | - |
| TTTTTCACA  | 2046865 | - |
| TTATGAACA  | 2046964 | + |
| CTGTTCAACA | 2047036 | - |
| and 2 more |         |   |

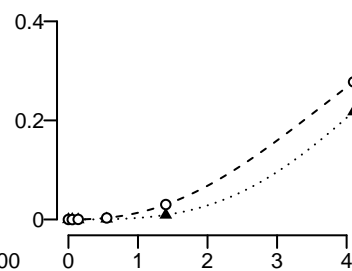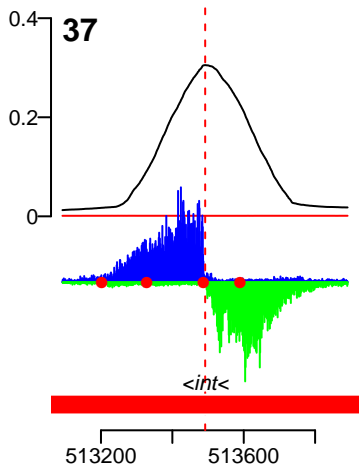

|           |        |   |
|-----------|--------|---|
| ACATTCACA | 513202 | - |
| ACATTCACA | 513328 | - |
| TTATGCACA | 513487 | + |
| TTTTAACA  | 513590 | + |

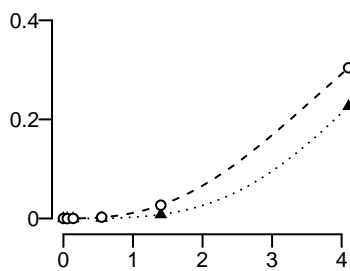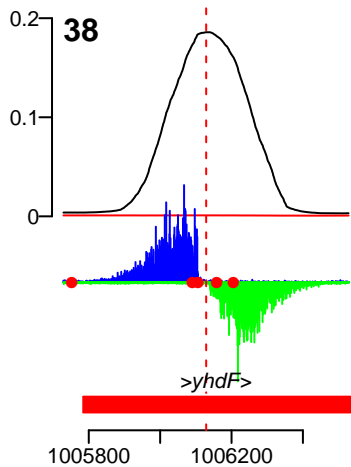

|            |         |   |
|------------|---------|---|
| TCAACCACA  | 1005752 | + |
| TCGTCCCA   | 1006090 | - |
| TTGTTCAACA | 1006106 | - |
| TTGTTCACT  | 1006159 | - |
| ATTTCAACA  | 1006205 | + |

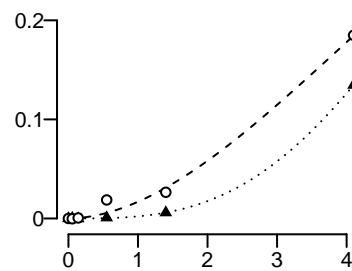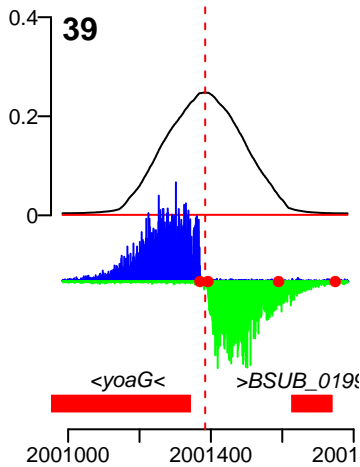

|           |         |   |
|-----------|---------|---|
| TTATTCACA | 2001370 | + |
| AAATTCACA | 2001392 | + |
| ATTTCAACA | 2001590 | + |
| TTACCCCA  | 2001749 | + |

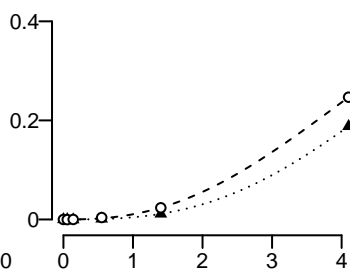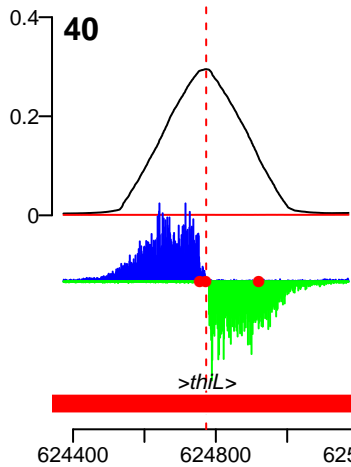

|           |        |   |
|-----------|--------|---|
| GTTTCACA  | 624755 | - |
| TTATCCACA | 624772 | + |
| CTTTCACA  | 624920 | - |

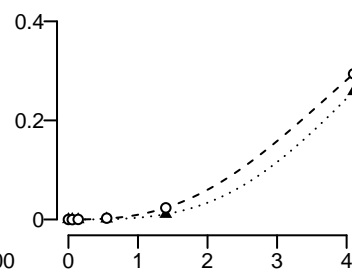

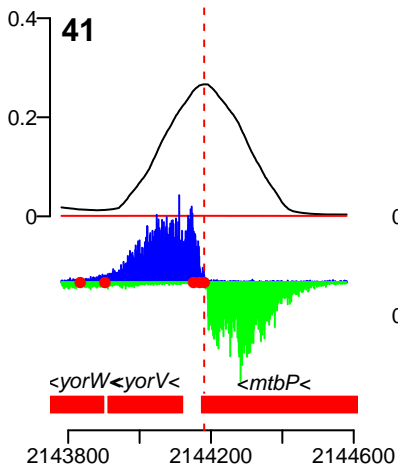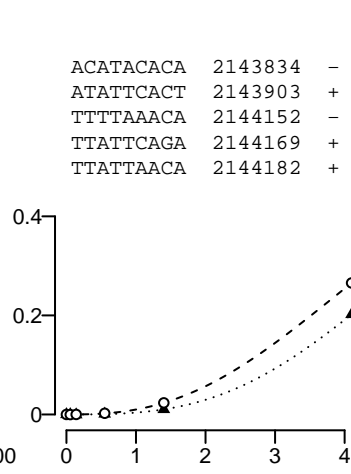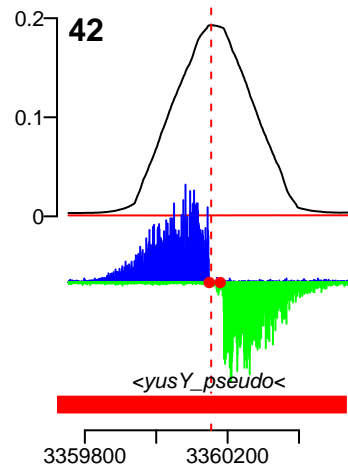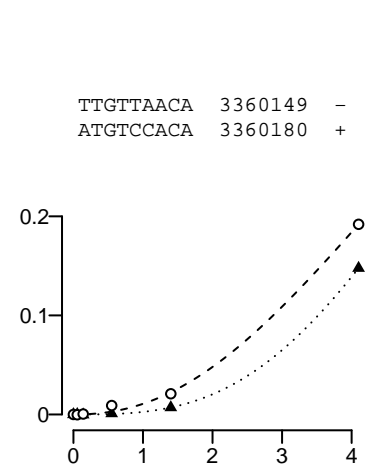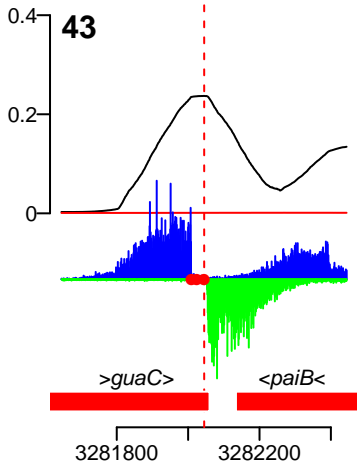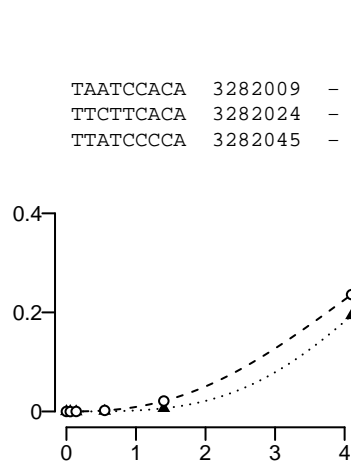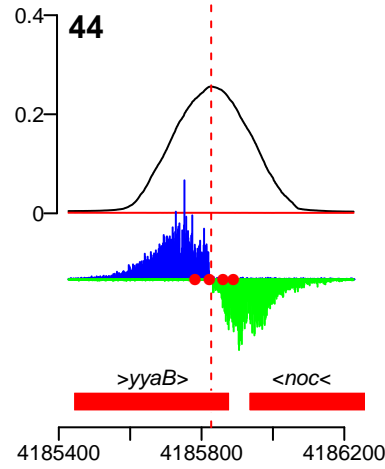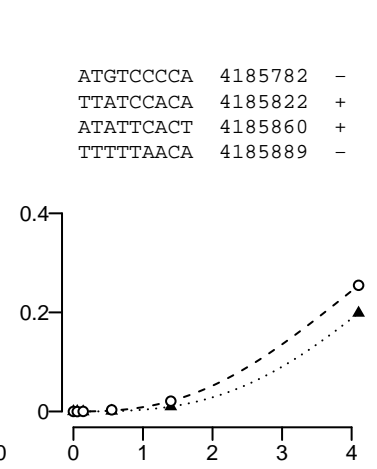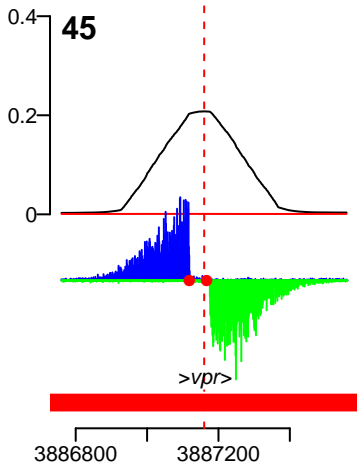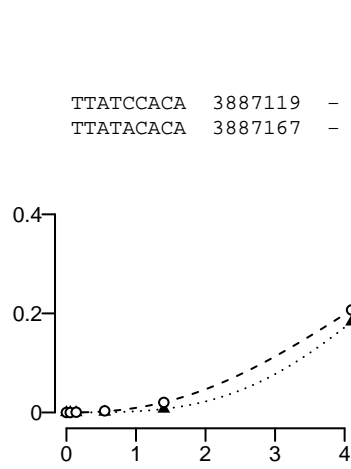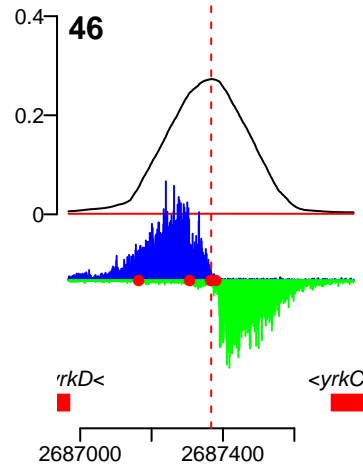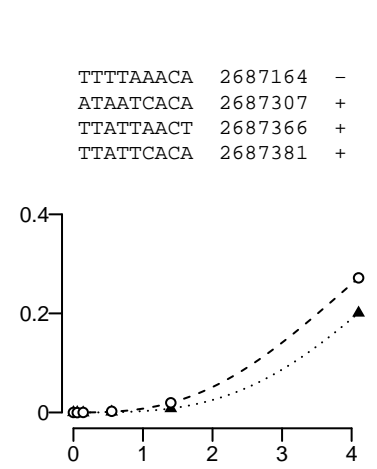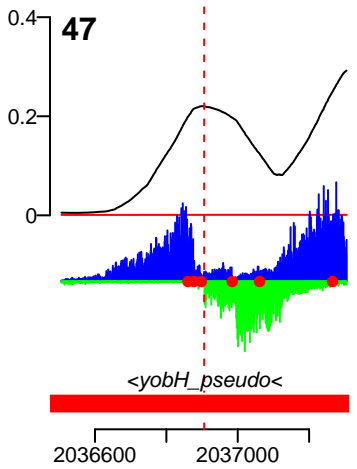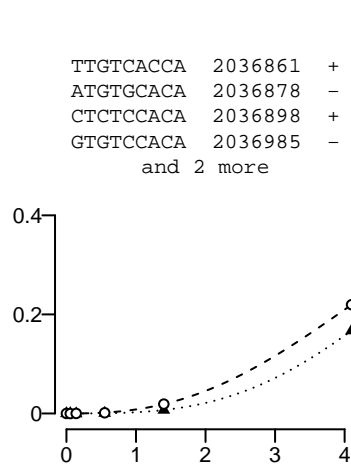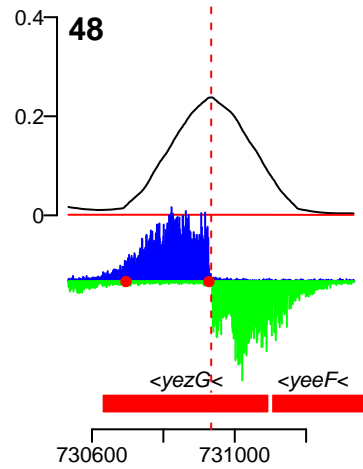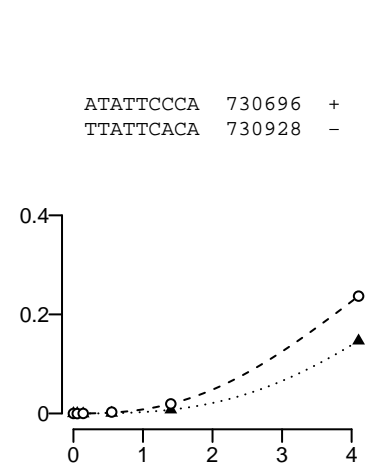

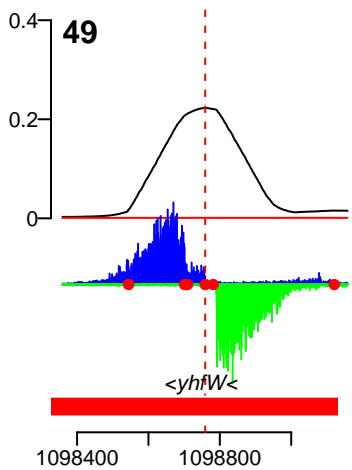

|            |         |   |
|------------|---------|---|
| TTTTGAACA  | 1098545 | + |
| AAATCCACA  | 1098702 | - |
| TTTTGAACA  | 1098710 | + |
| CCATTCACA  | 1098760 | + |
| and 2 more |         |   |

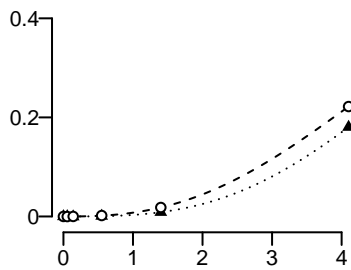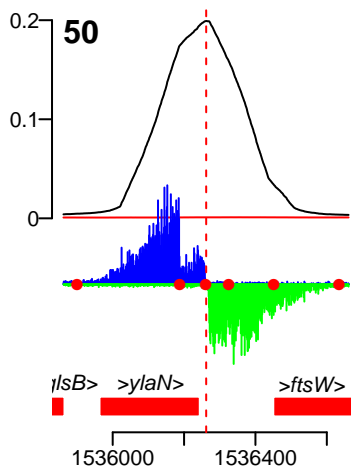

|            |         |   |
|------------|---------|---|
| GTATCAACA  | 1535900 | - |
| TTATACACA  | 1536188 | + |
| TTATTAACA  | 1536261 | + |
| TTTTACACA  | 1536325 | + |
| and 2 more |         |   |

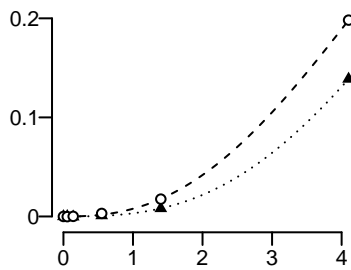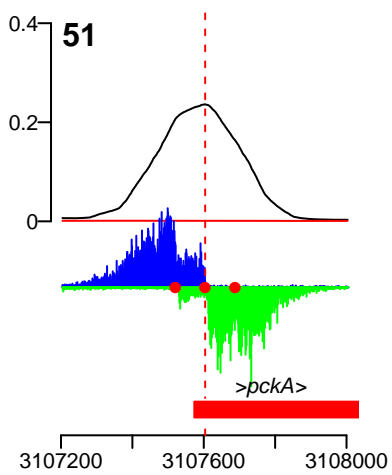

|           |         |   |
|-----------|---------|---|
| TAATTCACA | 3107521 | + |
| TTATTAACA | 3107604 | + |
| ACATCCACA | 3107688 | + |

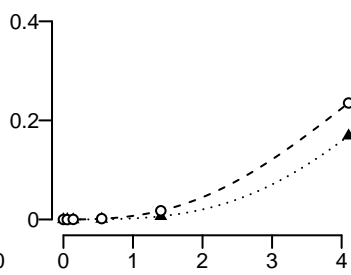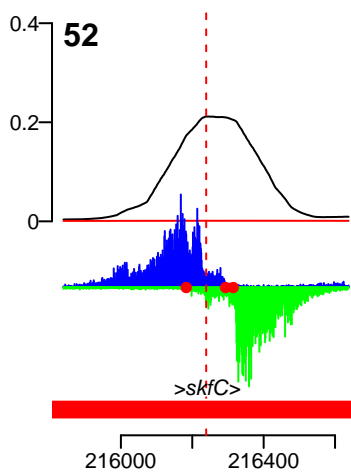

|           |        |   |
|-----------|--------|---|
| TAATCAACA | 216184 | - |
| TTGTCTACA | 216294 | + |
| TTATTAACA | 216315 | + |

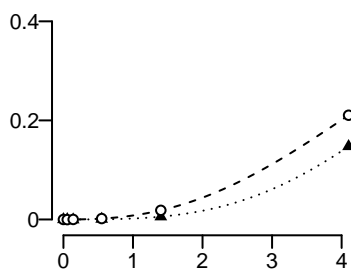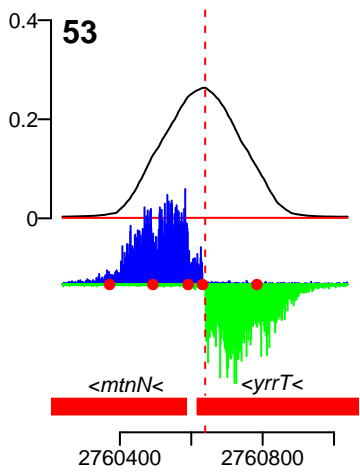

|           |         |   |
|-----------|---------|---|
| TCATTAACA | 2760372 | - |
| AAATTCACA | 2760493 | + |
| CTATTCACA | 2760592 | + |
| TTATCCACA | 2760632 | + |
| GTATCAACA | 2760784 | - |

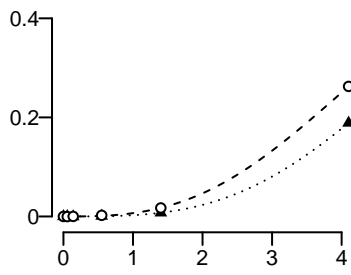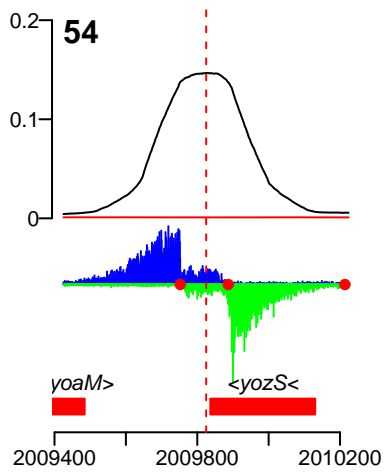

|           |         |   |
|-----------|---------|---|
| CAATCCACA | 2009753 | - |
| TCATCAACA | 2009887 | - |
| ATTTCCACA | 2010214 | + |

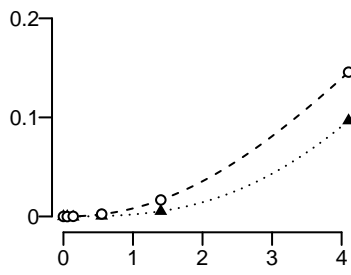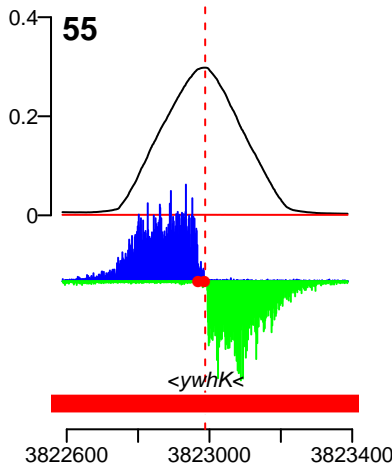

|           |         |   |
|-----------|---------|---|
| CCTTCCACA | 3822968 | + |
| CTATCCACA | 3822986 | + |

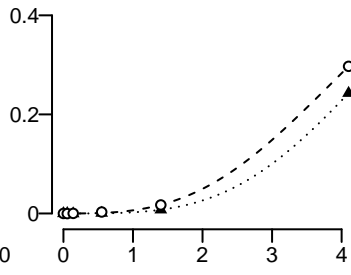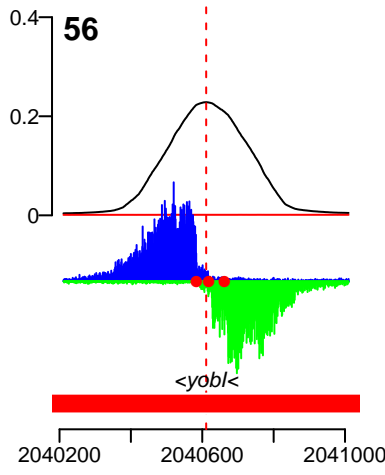

|           |         |   |
|-----------|---------|---|
| AAATCCACA | 2040584 | + |
| TTGCTAACA | 2040618 | + |
| ATACCAACA | 2040662 | - |

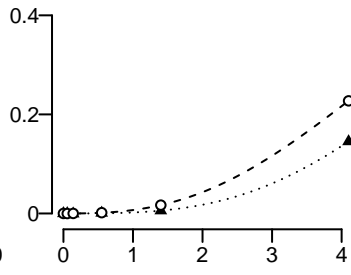

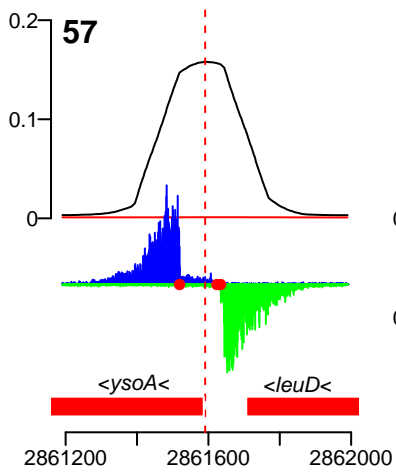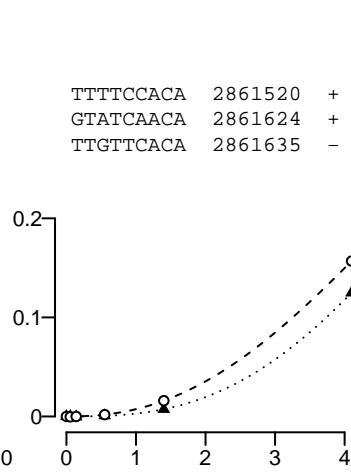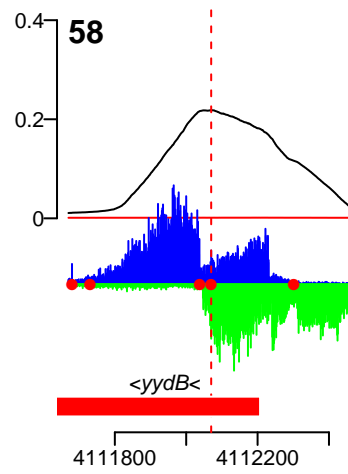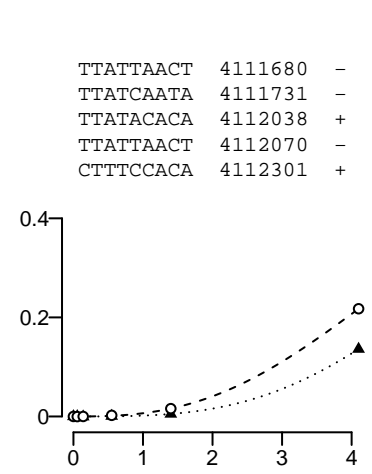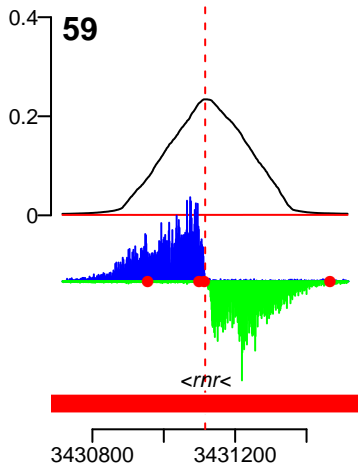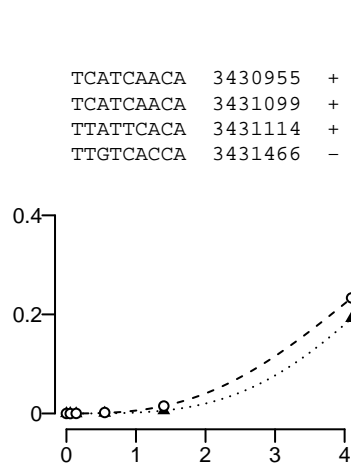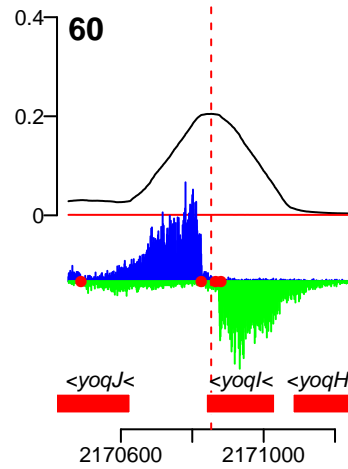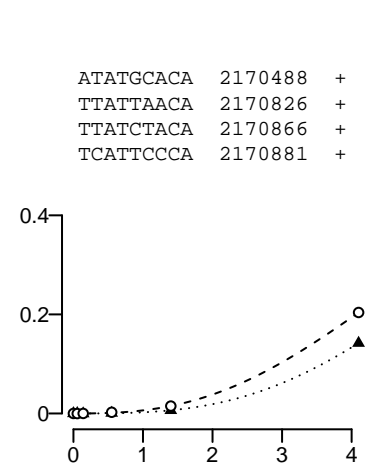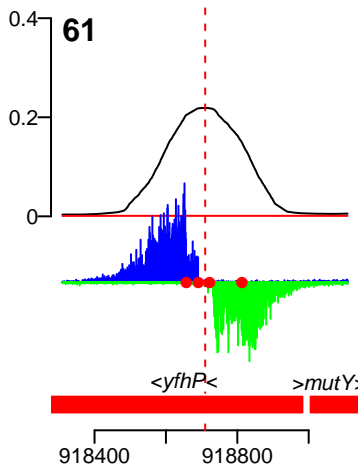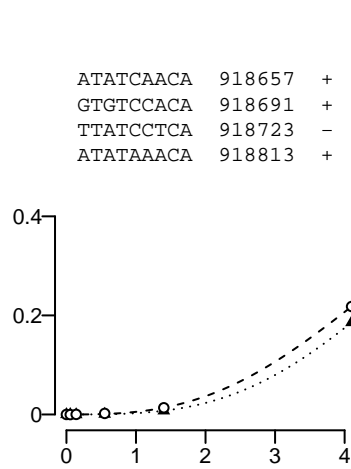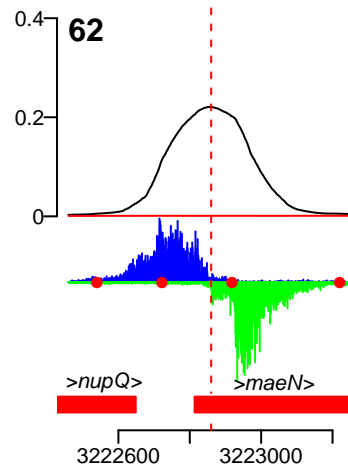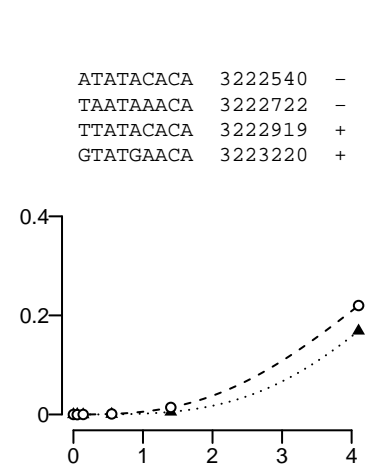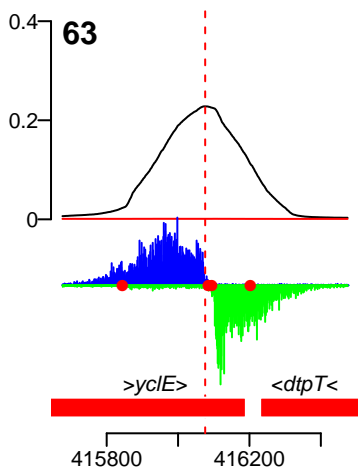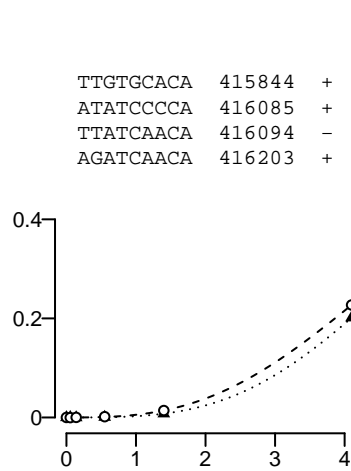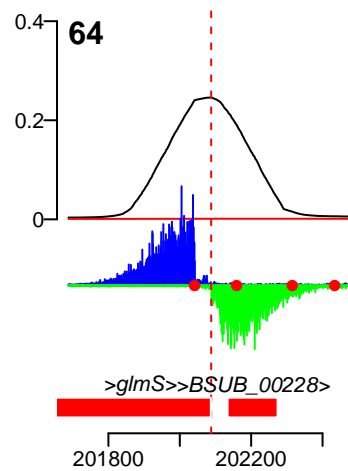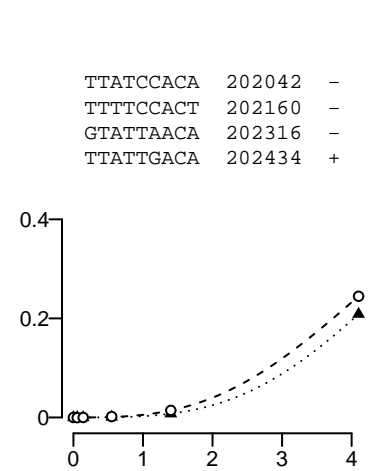



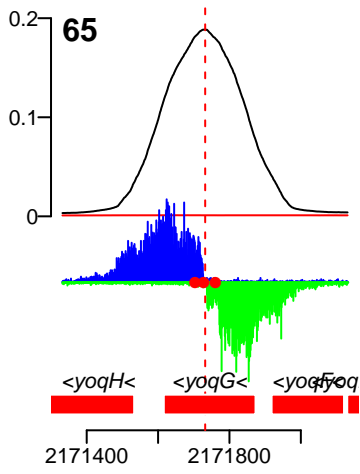

|           |         |   |
|-----------|---------|---|
| TTATCAACG | 2171704 | + |
| TTTTCCCA  | 2171728 | + |
| GTATACACA | 2171761 | - |

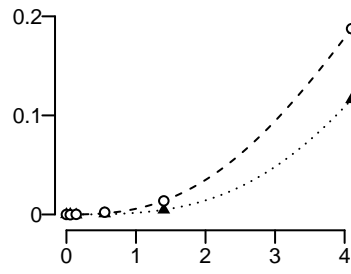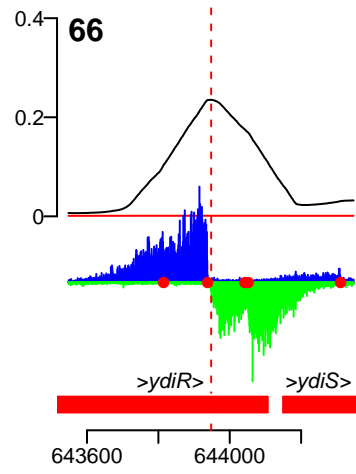

|           |        |   |
|-----------|--------|---|
| ATATCACCA | 643815 | - |
| TTATCAACA | 643938 | - |
| ATGTCCCA  | 644043 | - |
| TCATCAACA | 644052 | - |
| TTATCACCA | 644311 | - |

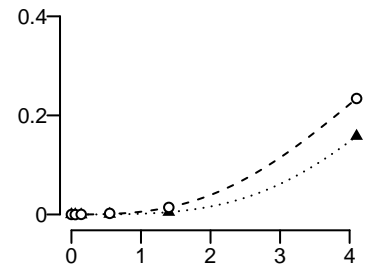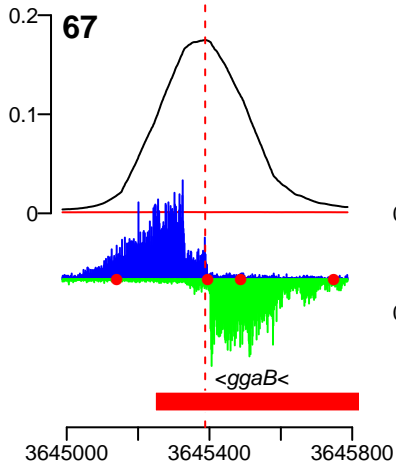

|           |         |   |
|-----------|---------|---|
| ATATTCACT | 3645140 | - |
| TTATCCACT | 3645395 | + |
| TTATCAATA | 3645488 | - |
| ATATTCACT | 3645748 | + |

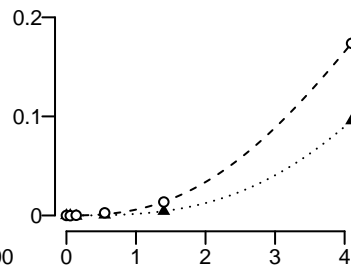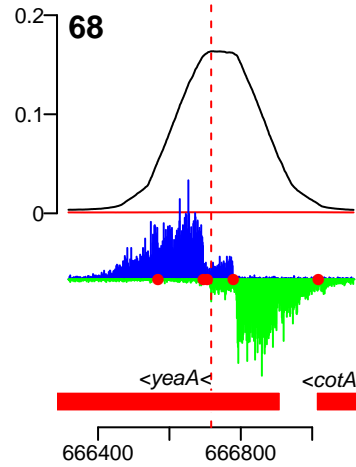

|           |        |   |
|-----------|--------|---|
| ATGTTTACA | 666568 | - |
| CAATTCACA | 666695 | - |
| TTCTCAACA | 666706 | - |
| TTATTCACA | 666779 | + |
| TGATCCCA  | 667017 | - |

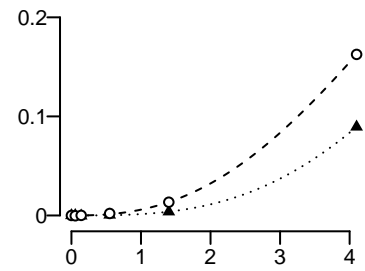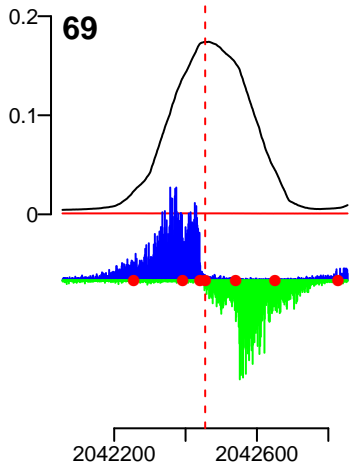

|            |         |   |
|------------|---------|---|
| TGTTTACA   | 2042255 | + |
| ATAATCACA  | 2042392 | + |
| TTTTACACA  | 2042441 | + |
| ATATCGACA  | 2042456 | + |
| and 3 more |         |   |

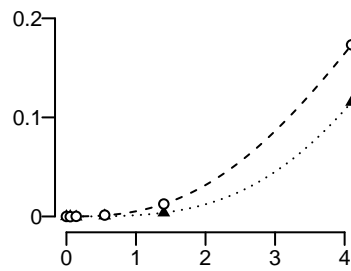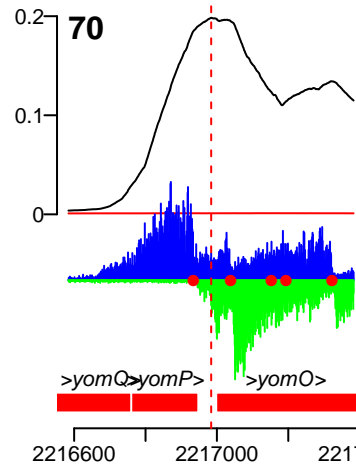

|           |         |   |
|-----------|---------|---|
| TTATCTACA | 2216934 | + |
| TTATTGACA | 2217039 | - |
| TGATCAACA | 2217153 | + |
| AAATCAACA | 2217194 | + |
| TTATTAACA | 2217323 | + |

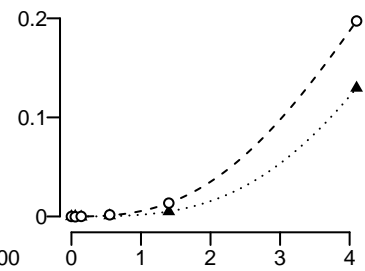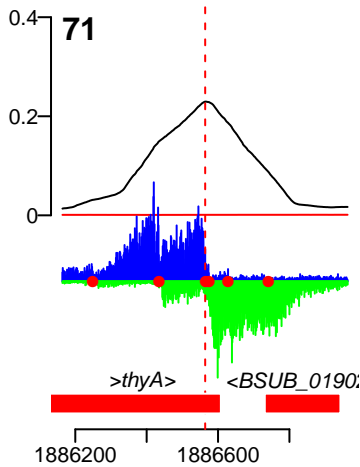

|            |         |   |
|------------|---------|---|
| GTATACACA  | 1886249 | - |
| GTGTACACA  | 1886435 | + |
| CTATAAACA  | 1886566 | + |
| TTGTCCCA   | 1886575 | - |
| and 2 more |         |   |

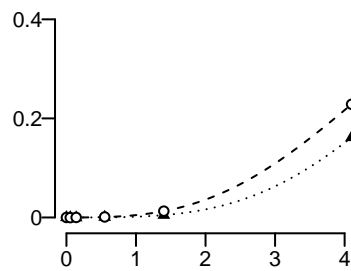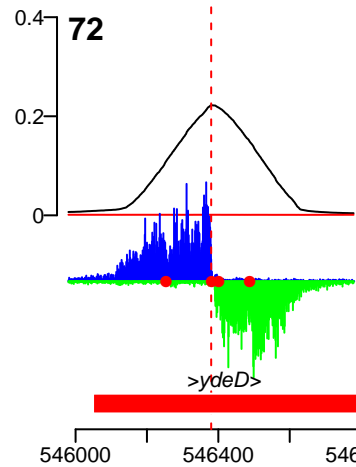

|           |        |   |
|-----------|--------|---|
| GTTTCACA  | 546254 | - |
| TTATCCCA  | 546382 | + |
| TTATCTACA | 546401 | + |
| TTGTTAACA | 546488 | - |

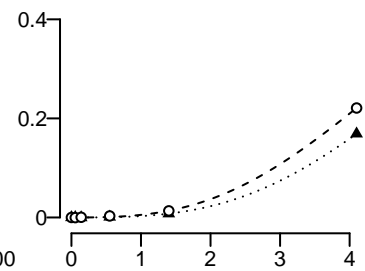

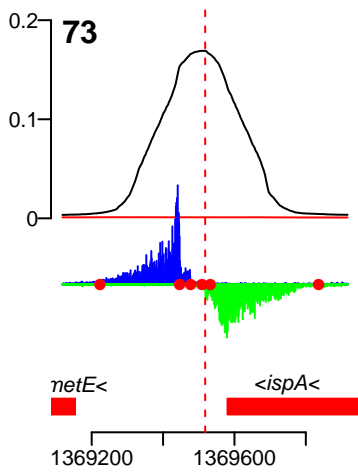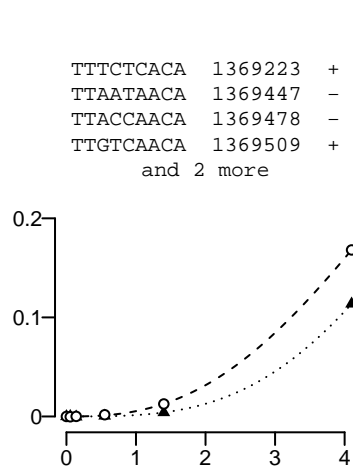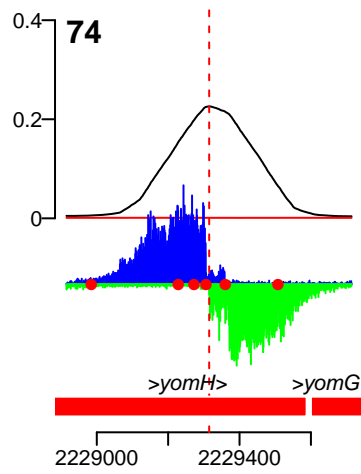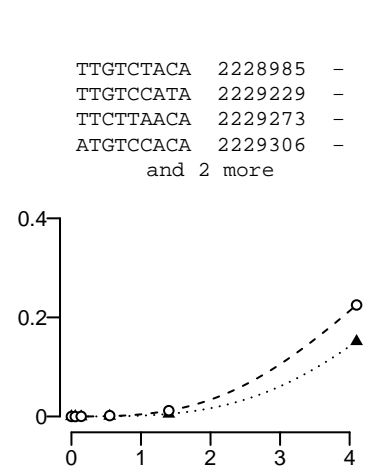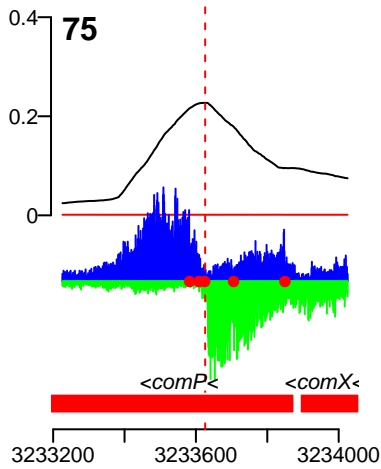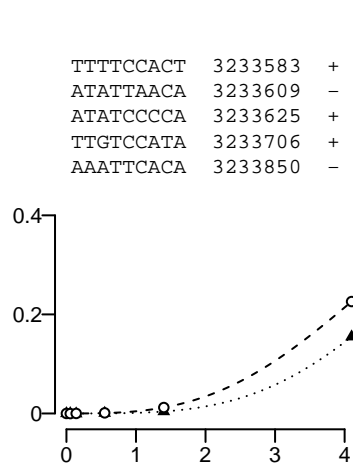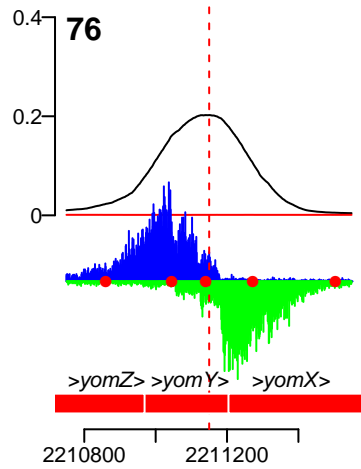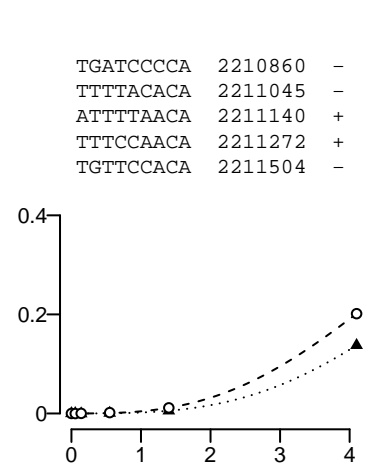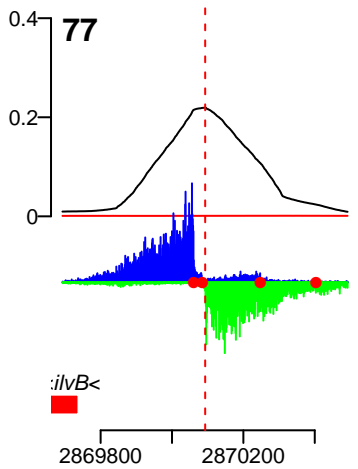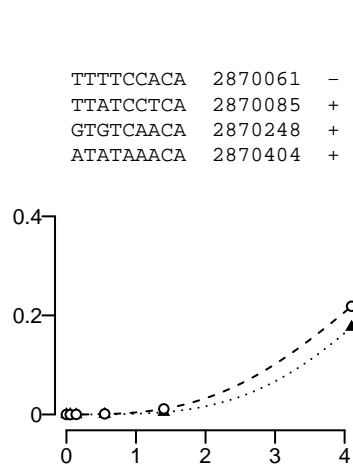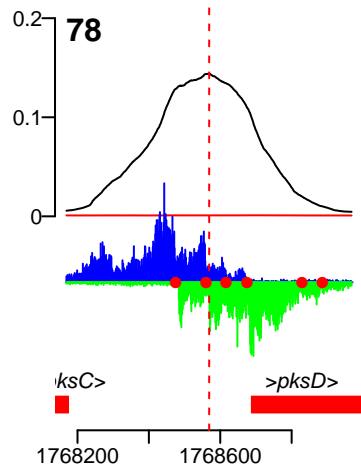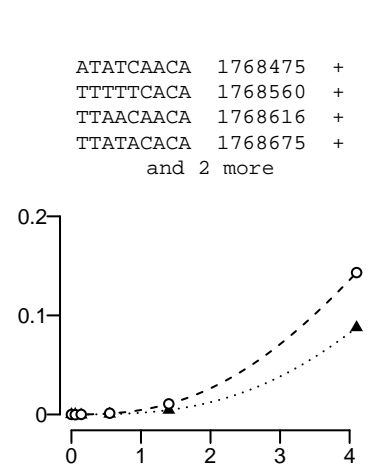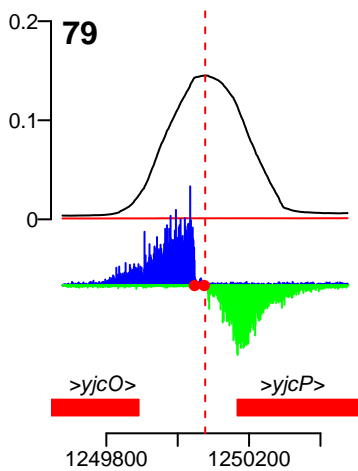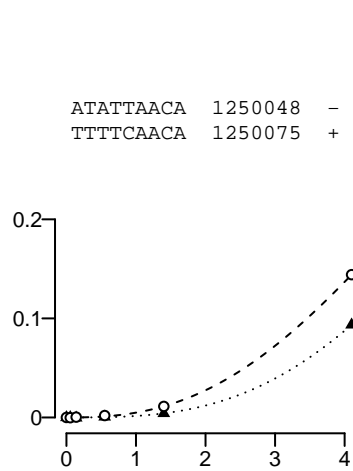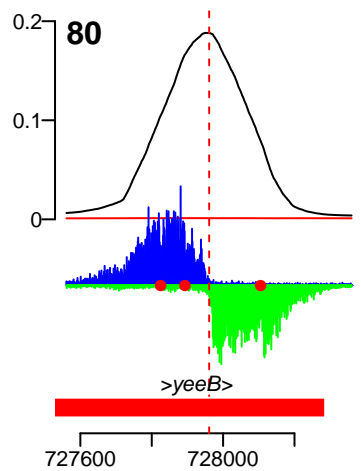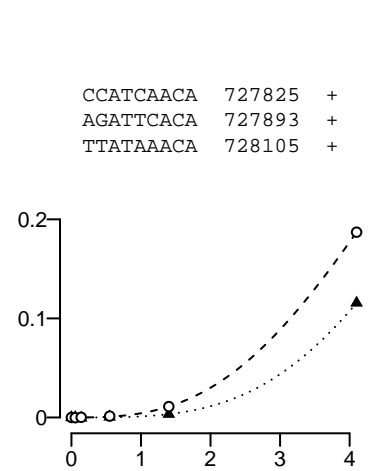

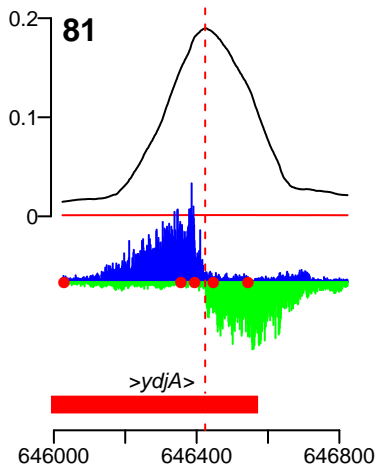

|           |        |   |
|-----------|--------|---|
| TCATTAACA | 646029 | - |
| AAATCAACA | 646356 | - |
| ATATAAACA | 646395 | - |
| TTTTCCACT | 646447 | + |
| TTGTAAACA | 646544 | - |

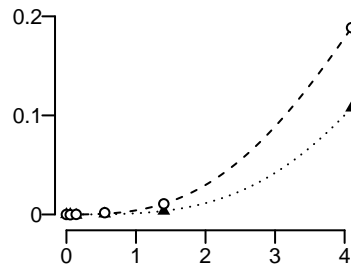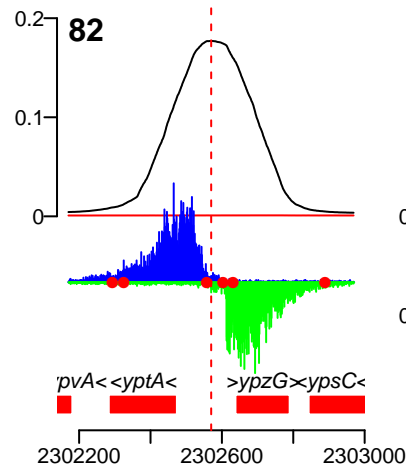

|            |         |   |
|------------|---------|---|
| TTGATCACA  | 2302293 | + |
| TATTCAACA  | 2302325 | - |
| ACATGCACA  | 2302558 | + |
| TTATCAACA  | 2302603 | + |
| and 2 more |         |   |

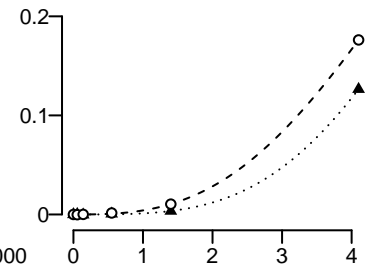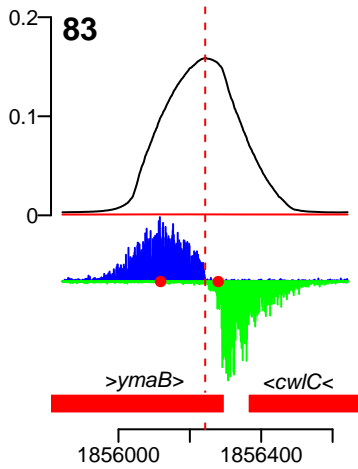

|           |         |   |
|-----------|---------|---|
| TTGCCAACA | 1856118 | - |
| ATATCAACA | 1856280 | - |

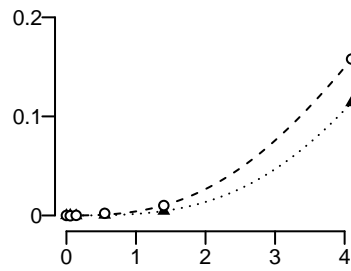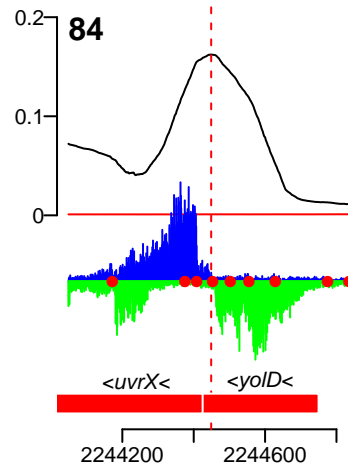

|            |         |   |
|------------|---------|---|
| AAATCCACA  | 2244172 | - |
| ATATCGACA  | 2244376 | + |
| TTACTCACA  | 2244409 | - |
| ATATCAACA  | 2244453 | - |
| and 5 more |         |   |

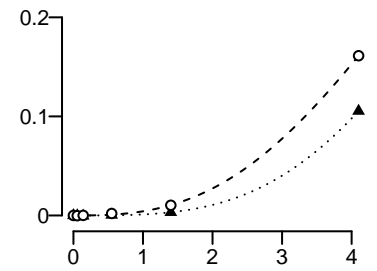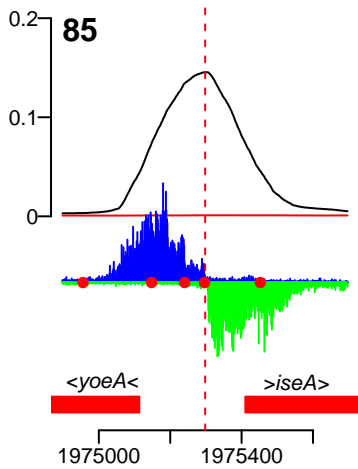

|           |         |   |
|-----------|---------|---|
| GCATCAACA | 1974956 | + |
| TTTTAAACA | 1975148 | + |
| TTTTACACA | 1975241 | + |
| TTACTCACA | 1975297 | - |
| TTAAGCACA | 1975453 | + |

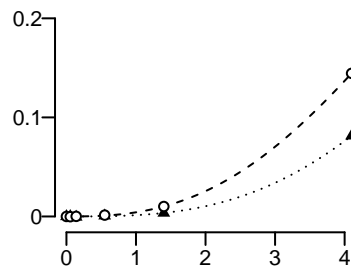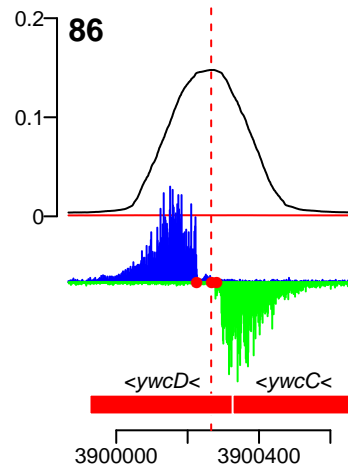

|            |         |   |
|------------|---------|---|
| TAATCCACA  | 3900226 | + |
| ATATTCACA  | 3900268 | + |
| GTTTTCAACA | 3900282 | - |

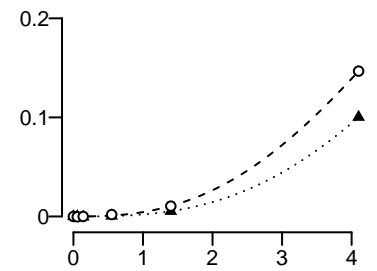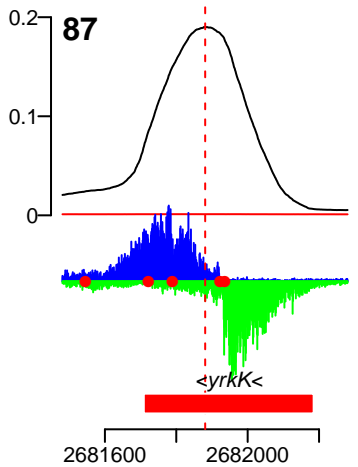

|            |         |   |
|------------|---------|---|
| TTATTTACA  | 2681545 | + |
| TTATCACCA  | 2681722 | + |
| TTATTAACCT | 2681789 | + |
| TTTTCCACA  | 2681923 | - |
| TTATCAACG  | 2681936 | - |

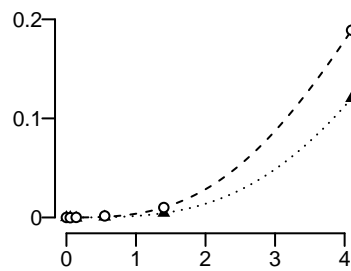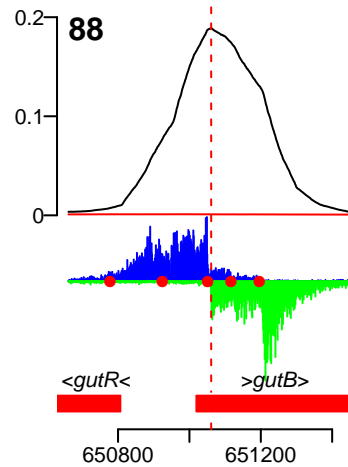

|           |        |   |
|-----------|--------|---|
| ATTTGCACA | 650778 | - |
| TTTTTAACA | 650924 | - |
| TTATGCACA | 651051 | + |
| TAATCAACA | 651117 | - |
| TTTTCCACA | 651196 | - |

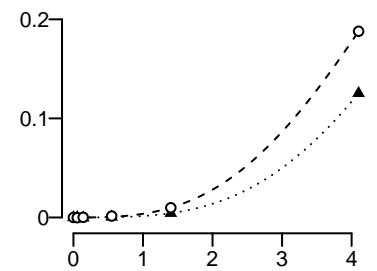

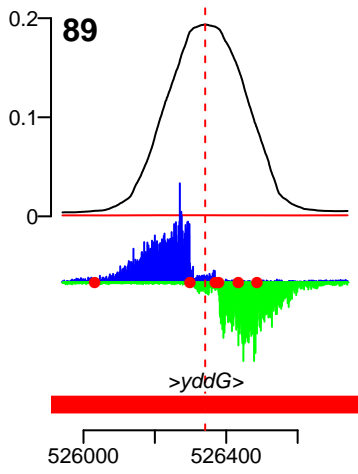

|            |        |   |
|------------|--------|---|
| TTAAACACA  | 526032 | - |
| TTGTCAACA  | 526299 | - |
| CAATCCACA  | 526370 | - |
| GTTTTCACA  | 526379 | + |
| and 2 more |        |   |

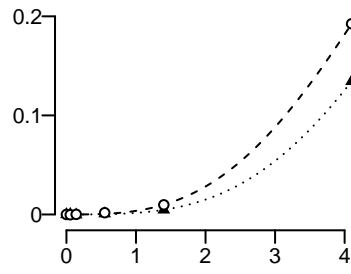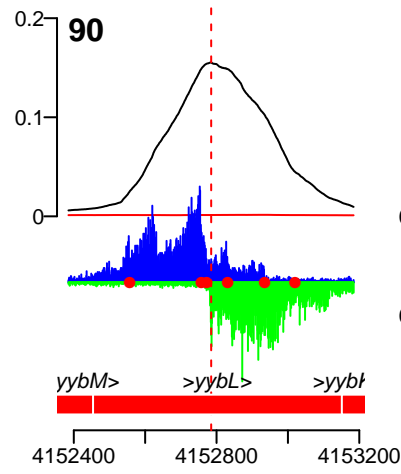

|            |         |   |
|------------|---------|---|
| TTATTCATA  | 4152557 | - |
| TTAATAACA  | 4152758 | - |
| GTGTACACA  | 4152773 | + |
| TAATAAACA  | 4152831 | - |
| and 2 more |         |   |

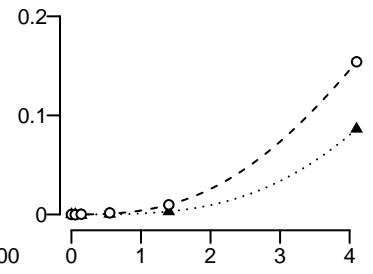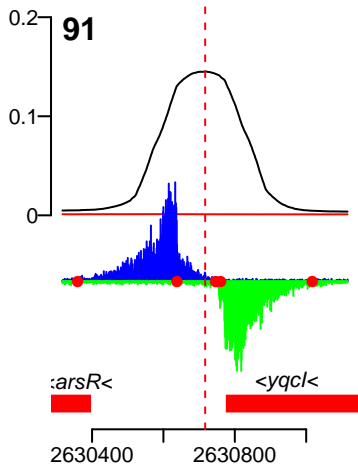

|           |         |   |
|-----------|---------|---|
| ATATGAACA | 2630360 | - |
| ATATTCACA | 2630638 | - |
| CCTTCCACA | 2630747 | + |
| TTTTAAACA | 2630761 | + |
| ACGTCAACA | 2631017 | + |

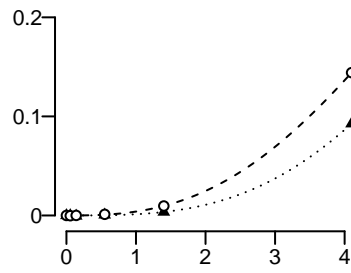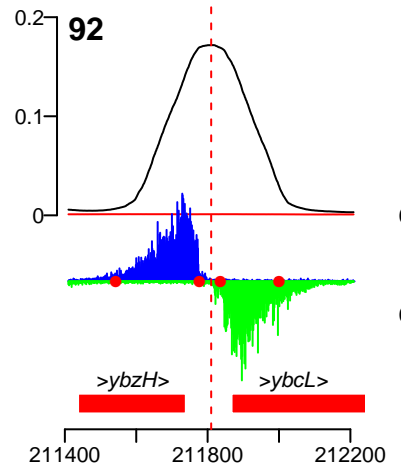

|           |        |   |
|-----------|--------|---|
| ATATGAACA | 211543 | + |
| ATATCGACA | 211777 | + |
| TAATAAACA | 211836 | - |
| TTATTACCA | 212000 | + |

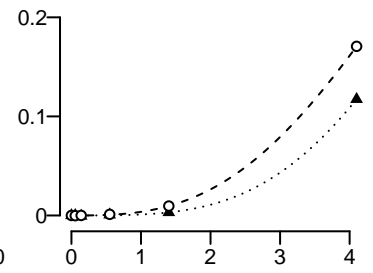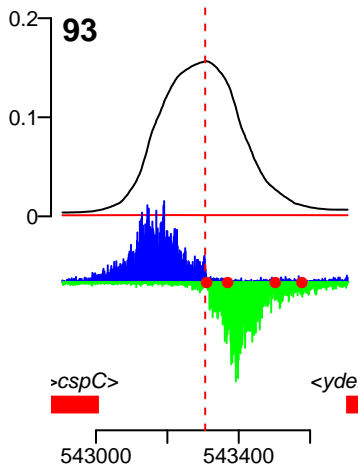

|           |        |   |
|-----------|--------|---|
| TTATCAACT | 543310 | + |
| ATATCCACT | 543369 | - |
| TGATTCACA | 543503 | - |
| TTATTTACA | 543577 | - |

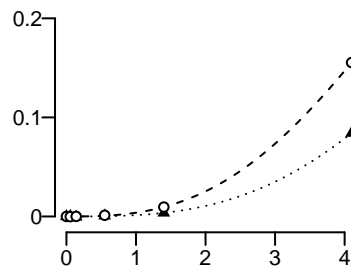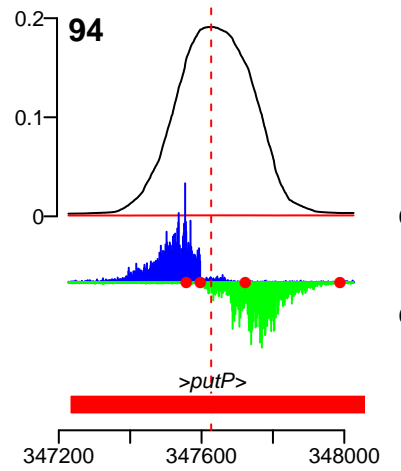

|           |        |   |
|-----------|--------|---|
| TATCAACA  | 347558 | + |
| CAATCCACA | 347597 | - |
| TTATTCACA | 347723 | + |
| TTATTACCA | 347988 | + |

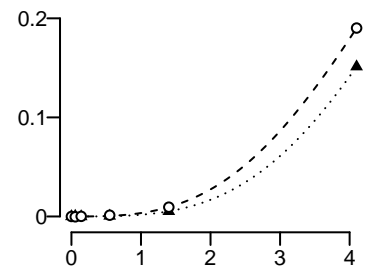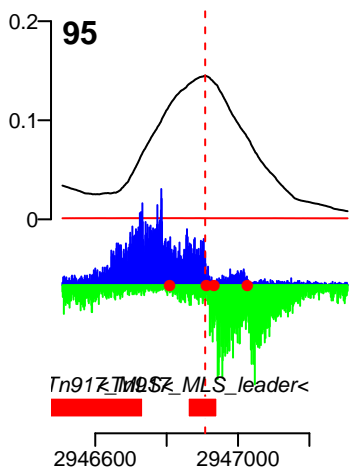

|           |         |   |
|-----------|---------|---|
| TTTTAAACA | 2946809 | - |
| TTATCTACA | 2946911 | + |
| ATACCAACA | 2946933 | + |
| CTATCAACA | 2947026 | + |

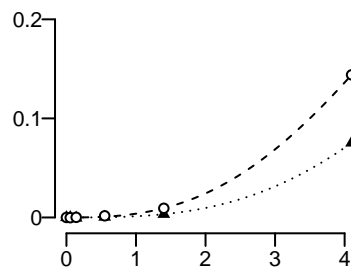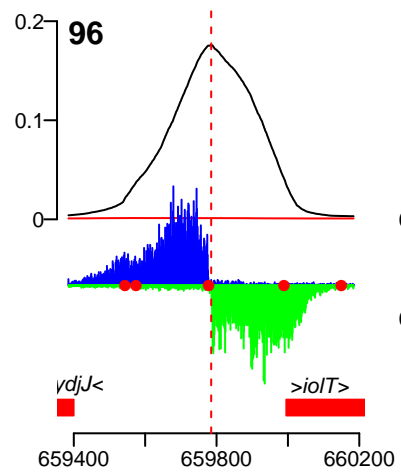

|           |        |   |
|-----------|--------|---|
| ATATGAACA | 659544 | + |
| TGATTCACA | 659575 | + |
| TTATGCACA | 659778 | + |
| TTATTCATA | 659899 | - |
| TTGTACACA | 660150 | + |

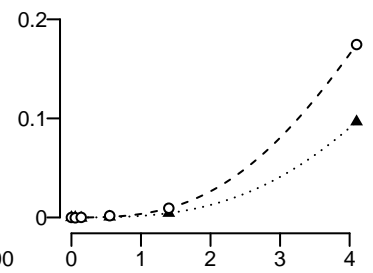

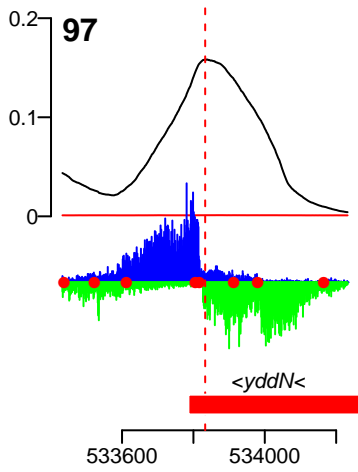

|            |        |   |
|------------|--------|---|
| TTATTCACC  | 533438 | - |
| TTTTCCACA  | 533523 | - |
| TAATAAACA  | 533612 | - |
| TTTTAAACA  | 533806 | + |
| and 4 more |        |   |

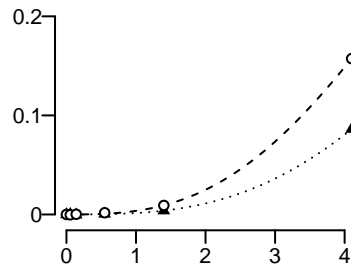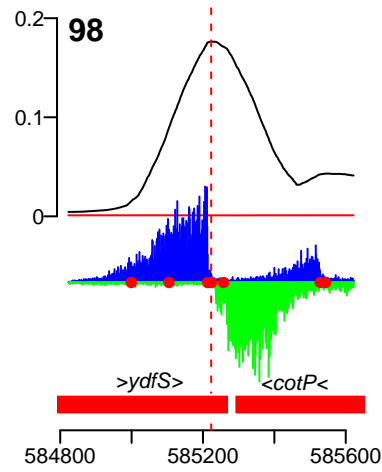

|            |        |   |
|------------|--------|---|
| TTCTTAACA  | 584999 | - |
| TTATCTCA   | 585105 | - |
| ATATCCCCA  | 585213 | - |
| TGATCCACA  | 585225 | - |
| and 3 more |        |   |

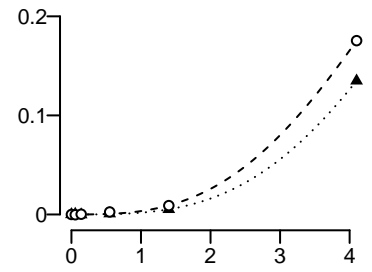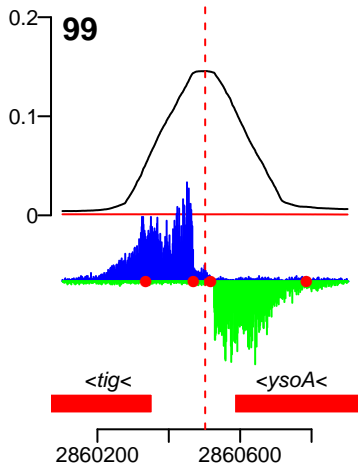

|           |         |   |
|-----------|---------|---|
| TTTTTCCA  | 2860335 | + |
| TTATTAACA | 2860469 | - |
| TTATACACA | 2860518 | + |
| TTCTCCACA | 2860786 | + |

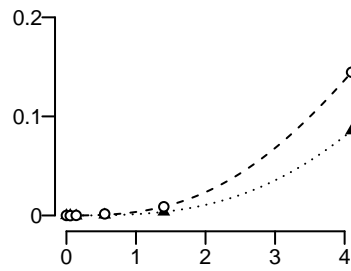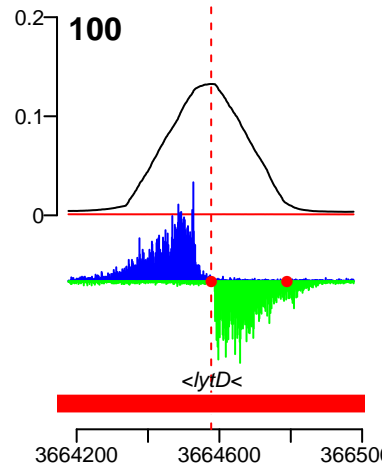

|            |         |   |
|------------|---------|---|
| TTATCAACA  | 3664578 | - |
| ACGTTCCACA | 3664790 | - |

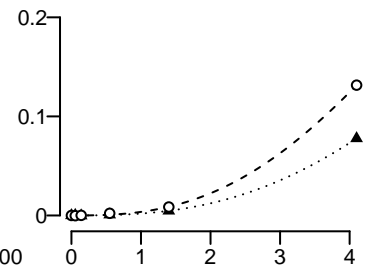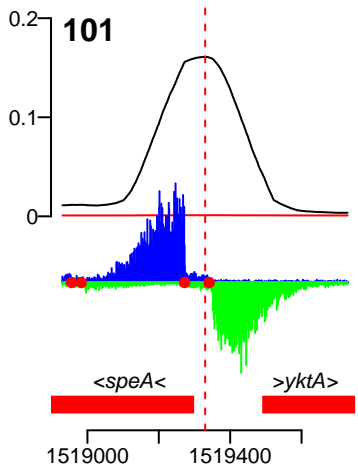

|           |         |   |
|-----------|---------|---|
| TTATGAACA | 1518956 | + |
| TTATCACCA | 1518983 | + |
| TTATACACA | 1519273 | - |
| TAATACACA | 1519342 | - |

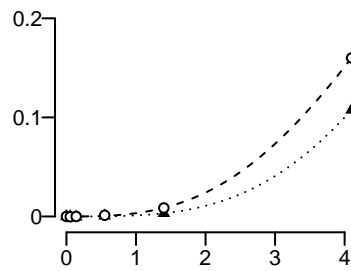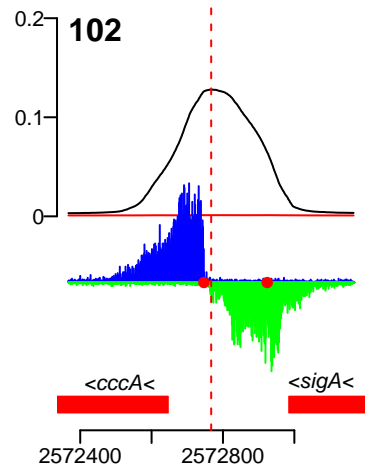

|           |         |   |
|-----------|---------|---|
| TTATTCACA | 2572747 | + |
| TTATCCATA | 2572925 | + |

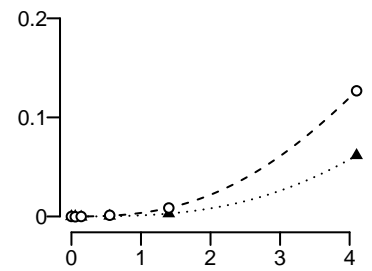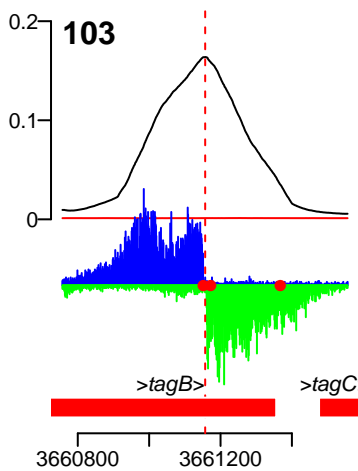

|           |         |   |
|-----------|---------|---|
| TTATCAACA | 3661152 | + |
| TTATCAACC | 3661173 | - |
| TTTTGAACA | 3661368 | - |

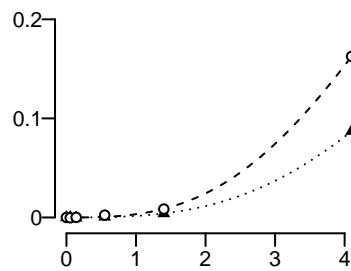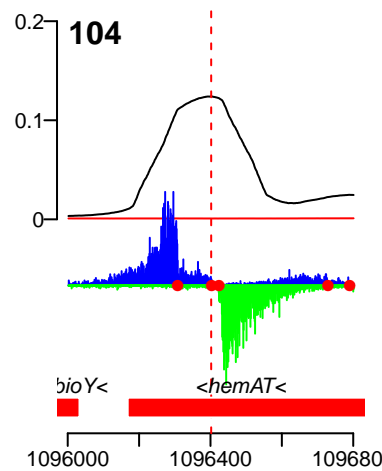

|            |         |   |
|------------|---------|---|
| TCGTCCACA  | 1096308 | - |
| AAATCAACA  | 1096404 | - |
| TTGTTCAACA | 1096424 | + |
| TCTTCAACA  | 1096730 | + |
| TTGTCCACA  | 1096790 | + |

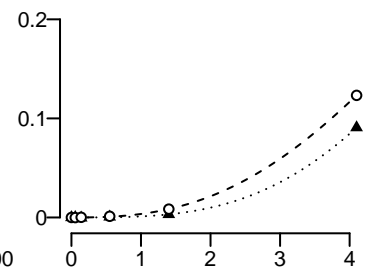

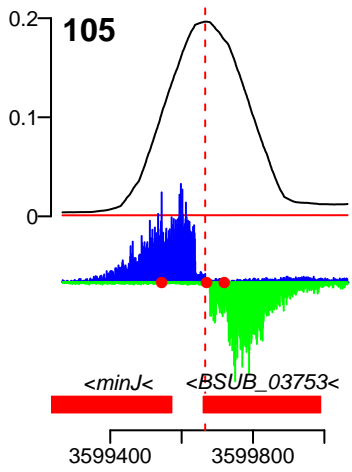

TTTTTAACA 3599544 +  
 TCATCCACA 3599670 +  
 ACATCCACA 3599720 +

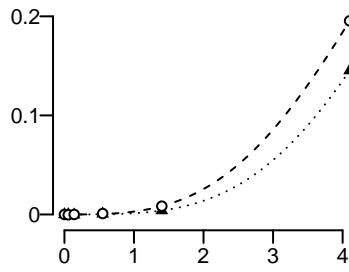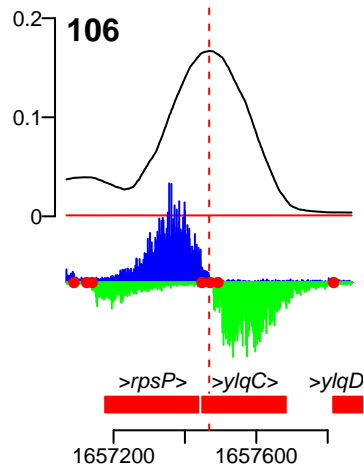

TTCTTAACA 1657089 -  
 ATATTAACA 1657125 -  
 ATTTCAACA 1657141 -  
 TGATCAACA 1657448 +  
 and 3 more

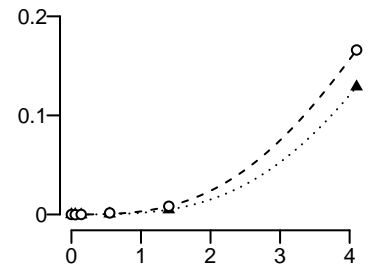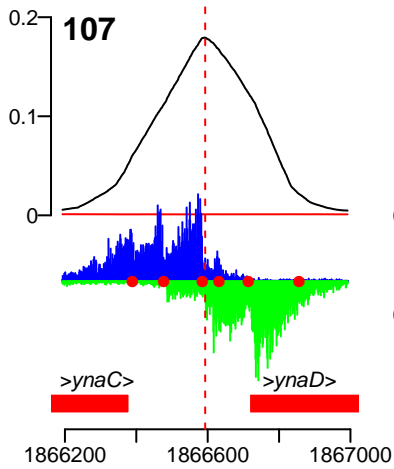

TTACCAACA 1866389 -  
 GCATCCACA 1866477 +  
 TTGTTCAACA 1866585 +  
 TATTCAACA 1866632 -  
 and 2 more

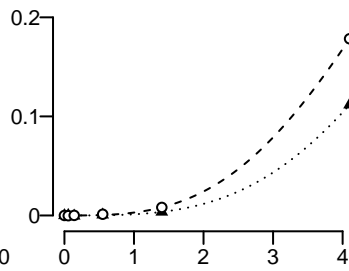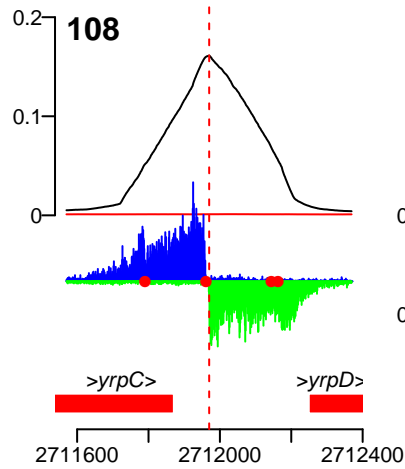

TGGTCCACA 2711790 -  
 TTATACACA 2711961 +  
 ATTTACACA 2712144 -  
 ACATGCACA 2712163 -

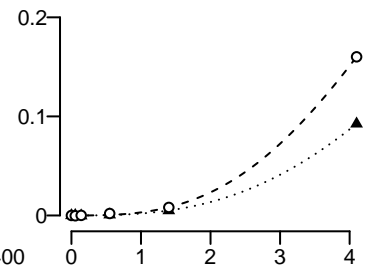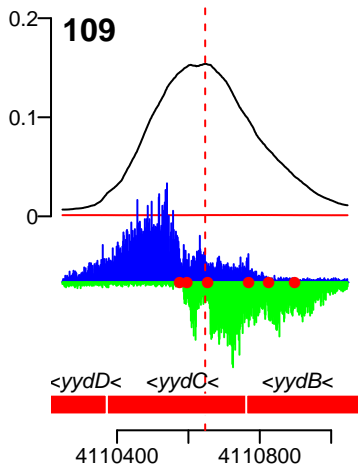

TCTTCCACA 4110576 +  
 TTATTAACA 4110596 -  
 TTATTCACA 4110654 +  
 TTCTTAACA 4110769 +  
 and 2 more

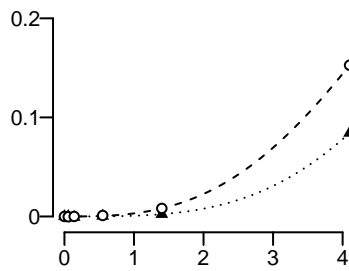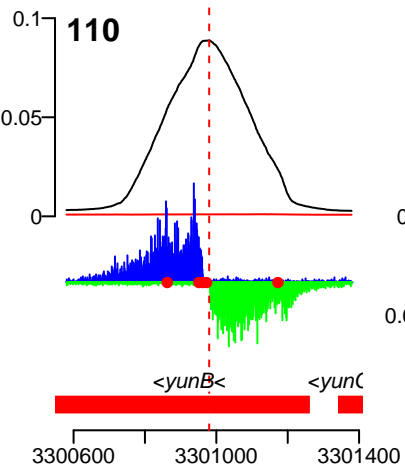

TGATCAACA 3300863 -  
 GTTTTCACA 3300952 +  
 TTGTAACA 3300962 -  
 TAATACACA 3300973 -  
 CTGTCAACA 3301173 -

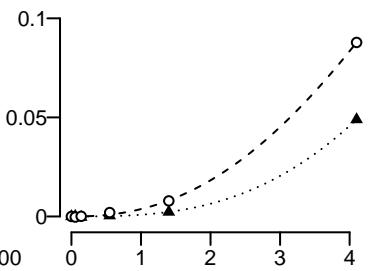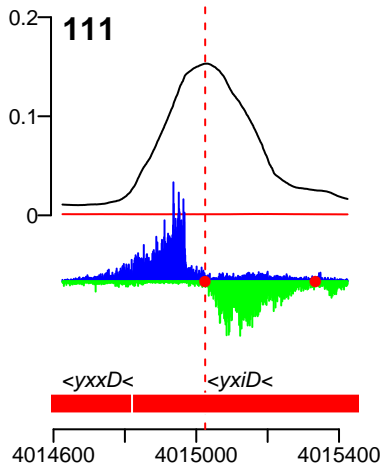

TTATAAACA 4015025 +  
 TTTTCCCA 4015334 +

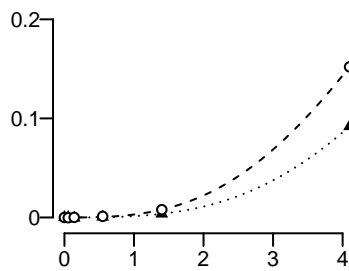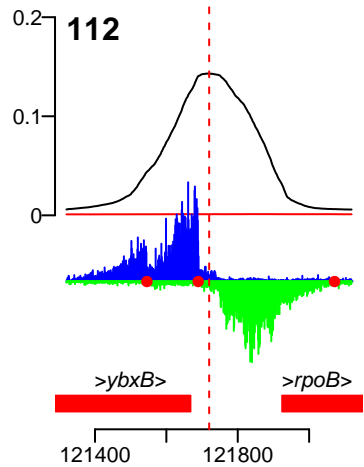

CGATCCACA 121546 -  
 ATATTAACA 121690 -  
 ATATCAACA 122072 +

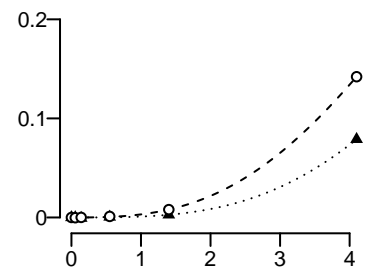

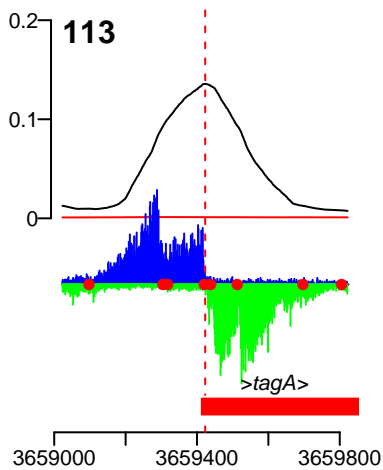

|            |         |   |
|------------|---------|---|
| ATATCGACA  | 3659098 | + |
| TCTTCAACA  | 3659305 | - |
| ATTTTAACA  | 3659318 | - |
| CTATTCACA  | 3659421 | + |
| and 4 more |         |   |

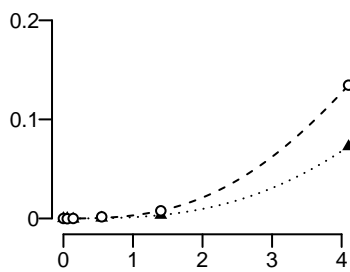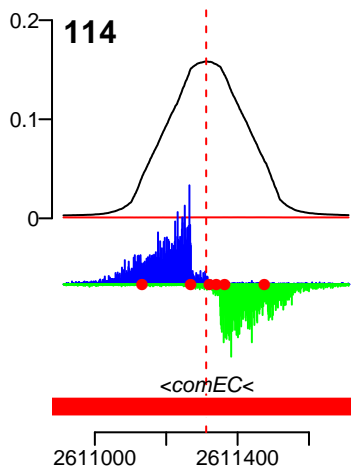

|            |         |   |
|------------|---------|---|
| ATATCCACT  | 2611132 | + |
| TTATTCACA  | 2611269 | - |
| ACATCAACA  | 2611321 | + |
| TTAATCACA  | 2611341 | - |
| and 2 more |         |   |

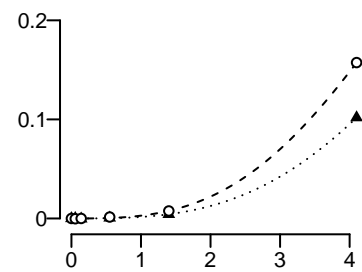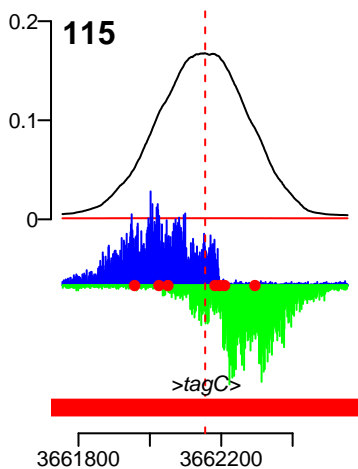

|            |         |   |
|------------|---------|---|
| TAATAAACA  | 3661958 | + |
| CTATTAACA  | 3662026 | - |
| TTATTTACA  | 3662051 | + |
| TTGCCAACA  | 3662183 | - |
| and 3 more |         |   |

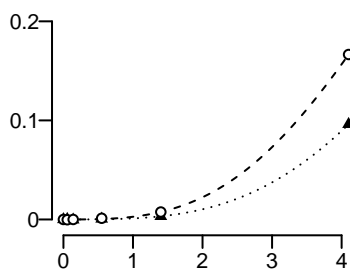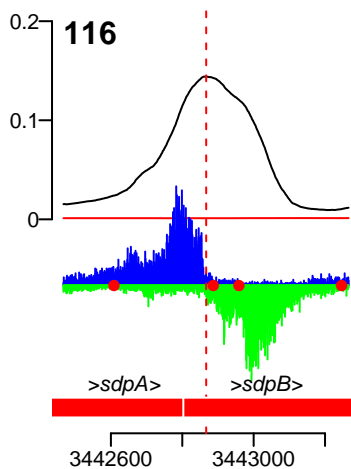

|            |         |   |
|------------|---------|---|
| GTTTTCAACA | 3442609 | - |
| TTCTCAACA  | 3442887 | + |
| ATTTTCACA  | 3442959 | - |
| TCTTTCACA  | 3443247 | + |

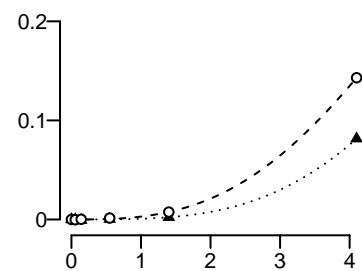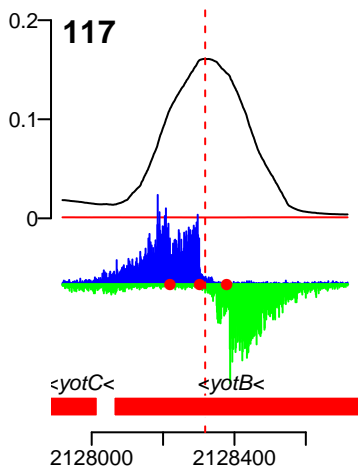

|           |         |   |
|-----------|---------|---|
| ATGTCCACA | 2128220 | + |
| CTGTTCACA | 2128303 | - |
| CTTTCCACA | 2128378 | + |

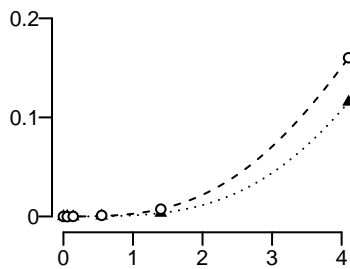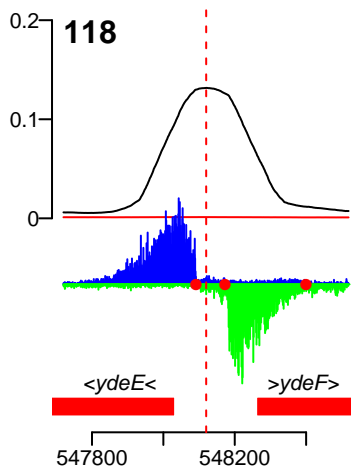

|           |        |   |
|-----------|--------|---|
| CTGTGCACA | 548092 | - |
| TTATGAACA | 548173 | - |
| TCCTCCACA | 548400 | + |

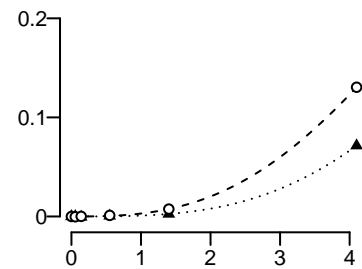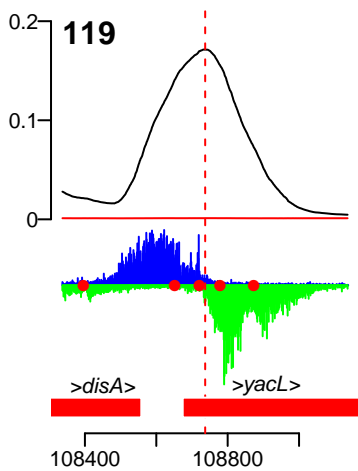

|           |        |   |
|-----------|--------|---|
| TTTTCAACA | 108396 | - |
| TTTTTAACA | 108652 | - |
| ATACCAACA | 108721 | - |
| TTAATAACA | 108779 | + |
| CTATCCACT | 108873 | - |

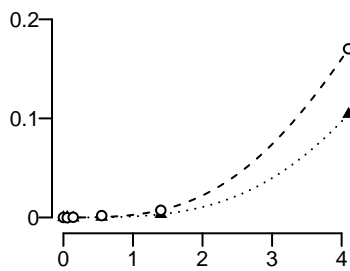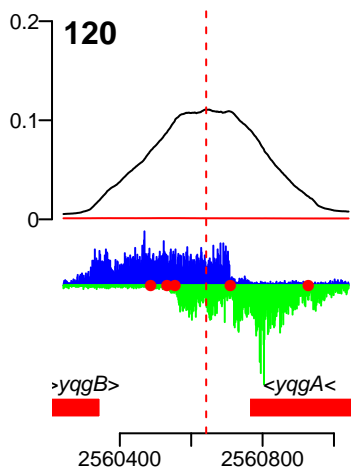

|           |         |   |
|-----------|---------|---|
| TTGTCCAGA | 2560487 | - |
| TTCTTAACA | 2560532 | + |
| TTTTTAACA | 2560555 | + |
| TCATCAACA | 2560710 | + |
| ATGTCCCA  | 2560928 | + |

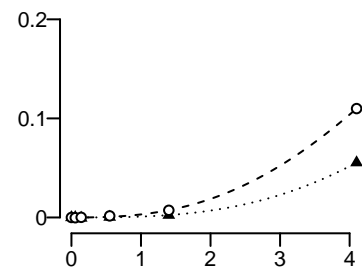

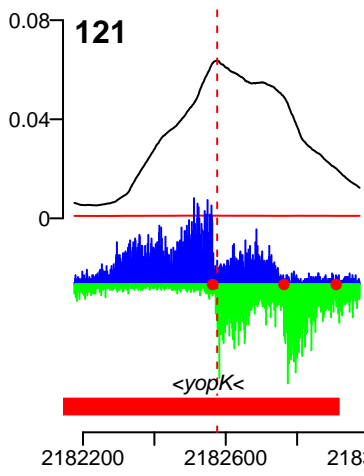

|           |         |   |
|-----------|---------|---|
| TTATACACT | 2182564 | + |
| TAGTCAACA | 2182763 | - |
| TTATTAACT | 2182910 | + |

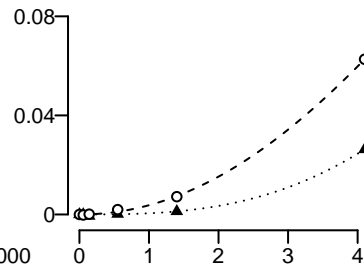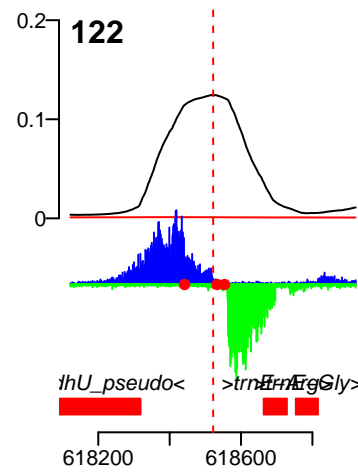

|           |        |   |
|-----------|--------|---|
| TGGTCAACA | 618442 | - |
| TTGTAAACA | 618534 | - |
| TTATACACA | 618554 | - |

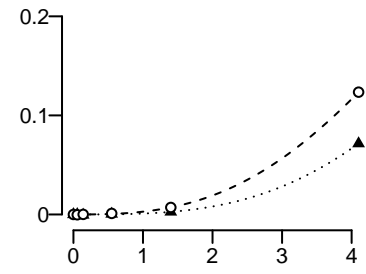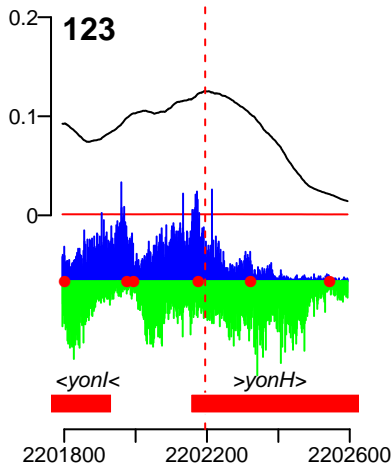

|            |         |   |
|------------|---------|---|
| TTCTTAACA  | 2201801 | + |
| TAATCCACT  | 2201976 | + |
| ATGTCAACA  | 2201995 | + |
| TTATTCAGA  | 2202176 | - |
| and 2 more |         |   |

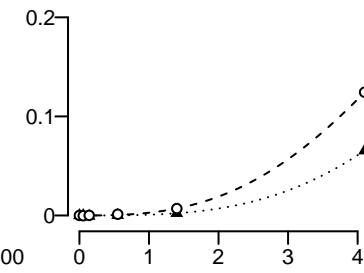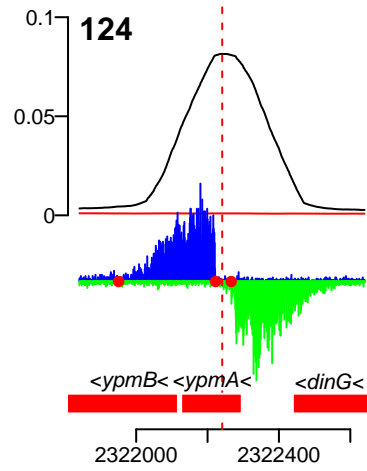

|           |         |   |
|-----------|---------|---|
| TGATCAACA | 2321951 | + |
| GTGTCCACA | 2322223 | + |
| CTTTCACA  | 2322267 | - |

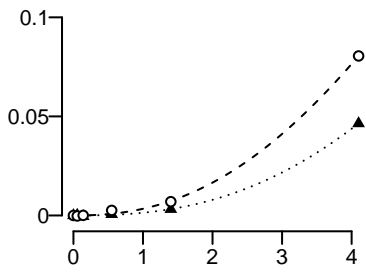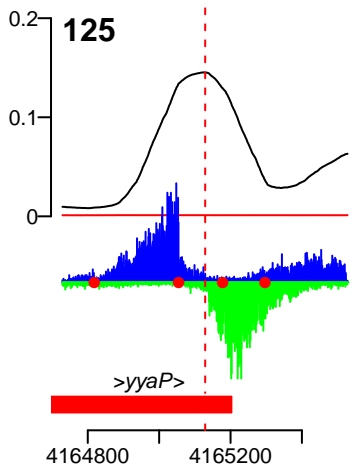

|           |         |   |
|-----------|---------|---|
| TTGTCCCA  | 4164819 | - |
| TCATCAACA | 4165055 | - |
| ATTTGCACA | 4165178 | - |
| TTATCAATA | 4165297 | + |

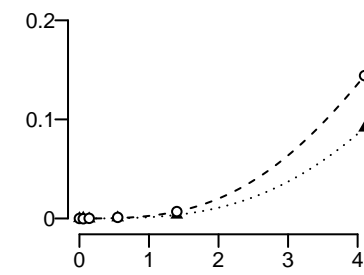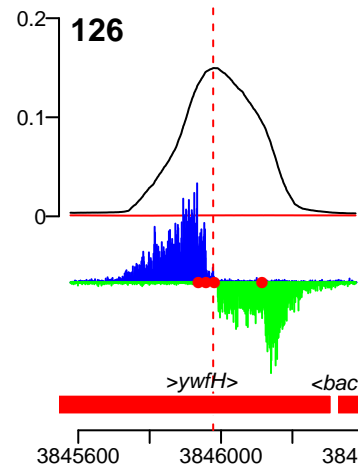

|           |         |   |
|-----------|---------|---|
| TCATCAACA | 3845937 | + |
| CTTTCACA  | 3845958 | - |
| ATGTTCACA | 3845981 | + |
| TTTTCCACA | 3846115 | - |

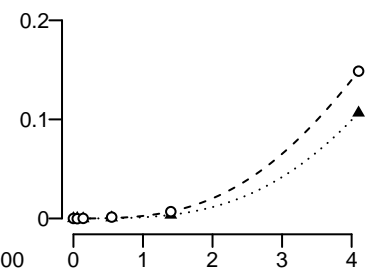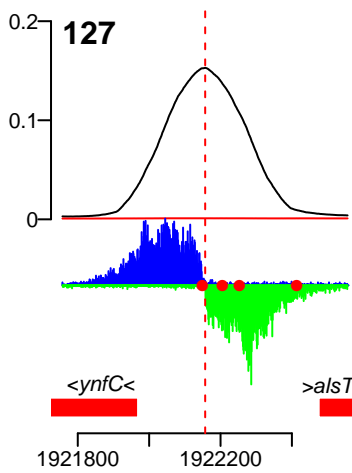

|           |         |   |
|-----------|---------|---|
| TTATTCACA | 1922149 | - |
| ATTTACACA | 1922205 | - |
| CTATTAACA | 1922253 | - |
| TTTTTAACA | 1922414 | - |

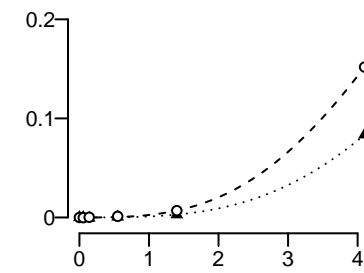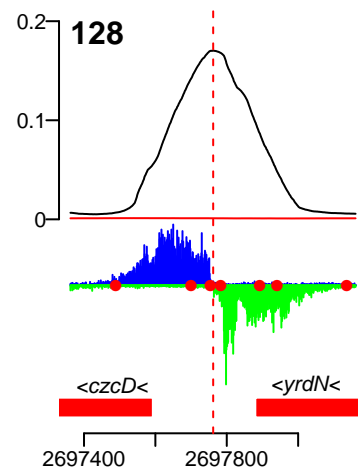

|            |         |   |
|------------|---------|---|
| TTTTTAACA  | 2697489 | - |
| ATATGAACA  | 2697700 | - |
| AAATCCACA  | 2697754 | + |
| TTATAACA   | 2697783 | + |
| and 3 more |         |   |

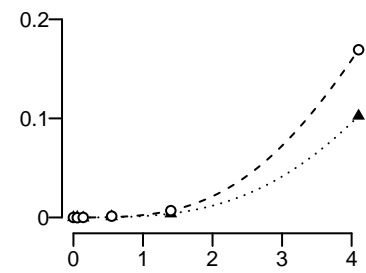



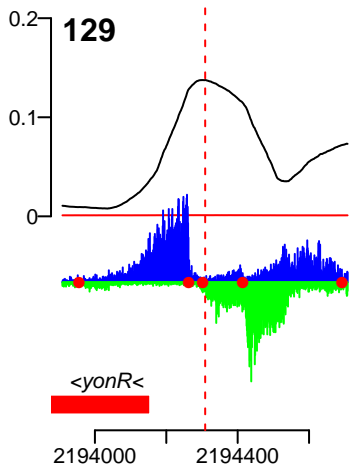

|           |         |   |
|-----------|---------|---|
| ACATGCACA | 2193956 | - |
| TTGTTAACA | 2194263 | + |
| AAATCAACA | 2194302 | - |
| TTATCCACT | 2194414 | - |
| ATTTCCACA | 2194693 | + |

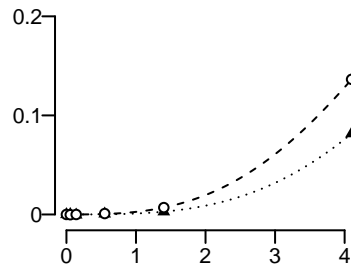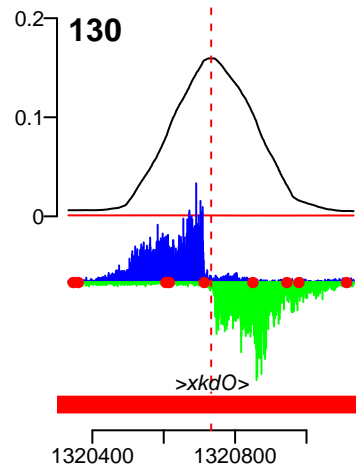

|            |         |   |
|------------|---------|---|
| GTTTCAACA  | 1320347 | + |
| TTGTCCATA  | 1320361 | - |
| TAATGAACA  | 1320607 | + |
| TCTTTCACA  | 1320616 | - |
| and 5 more |         |   |

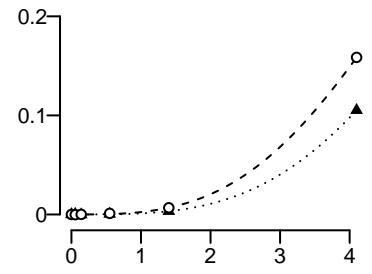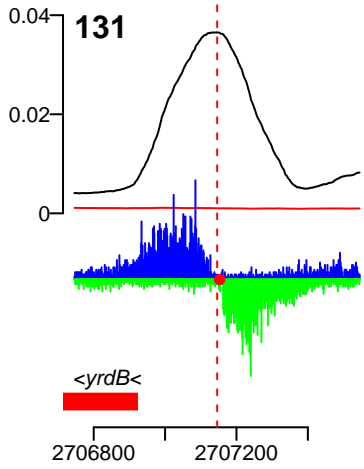

|           |         |   |
|-----------|---------|---|
| TTGTCTACA | 2707153 | + |
|-----------|---------|---|

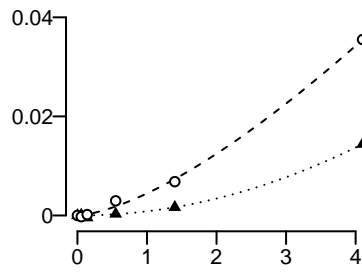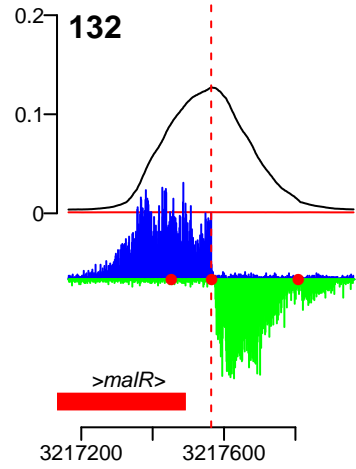

|           |         |   |
|-----------|---------|---|
| ACGTCACA  | 3217453 | + |
| TTATCAACA | 3217566 | - |
| ATACTCACA | 3217808 | + |

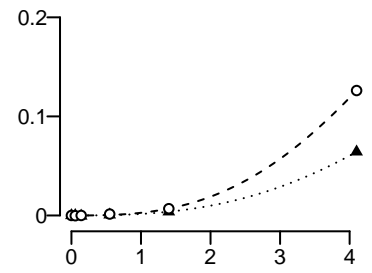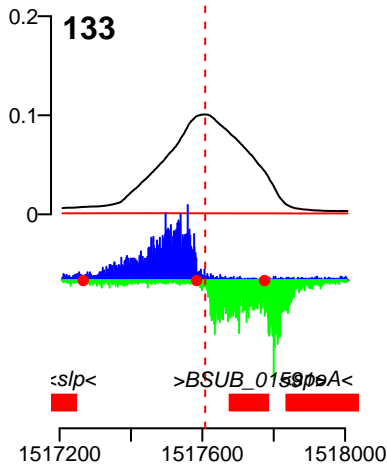

|           |         |   |
|-----------|---------|---|
| GTATAAACA | 1517267 | + |
| ATGTCAACA | 1517584 | - |
| TCATCAACA | 1517775 | - |

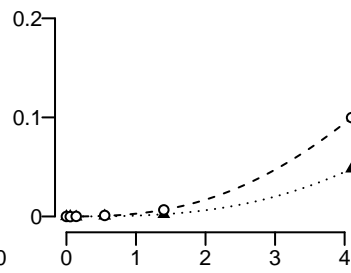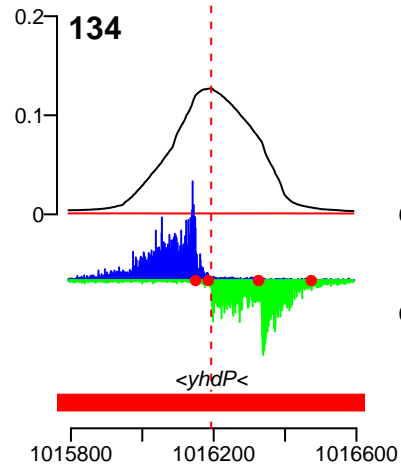

|           |         |   |
|-----------|---------|---|
| TTATTAACA | 1016150 | - |
| TCTTCCACA | 1016185 | + |
| TTATTCACA | 1016326 | + |
| TTTTGAACA | 1016474 | - |

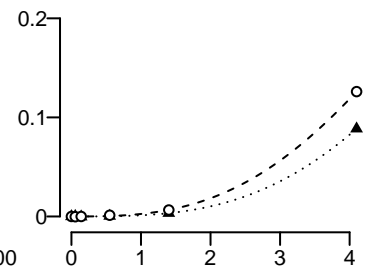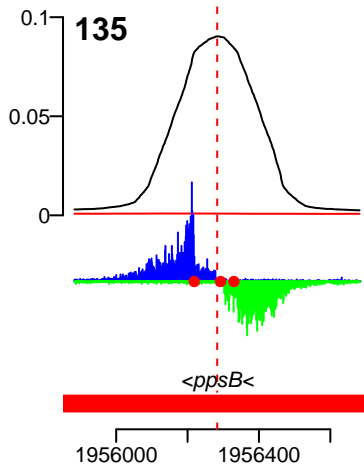

|           |         |   |
|-----------|---------|---|
| GATTTCACA | 1956219 | - |
| TTTTCAACA | 1956293 | - |
| GCATCAACA | 1956330 | + |

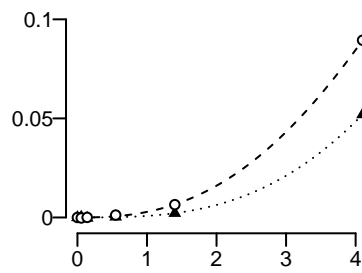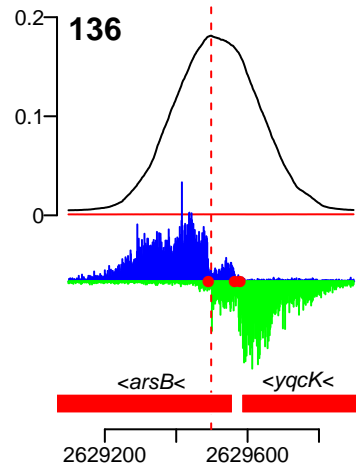

|           |         |   |
|-----------|---------|---|
| CTATCCCA  | 2629490 | + |
| TTATCTCA  | 2629564 | + |
| TTACTAACA | 2629579 | + |

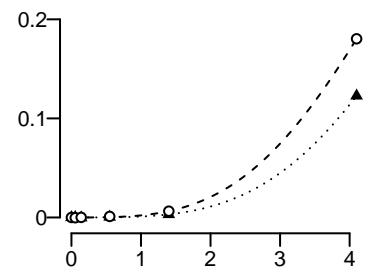

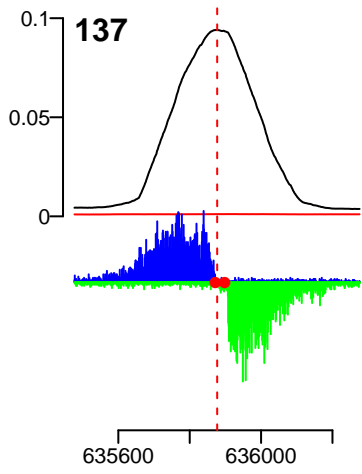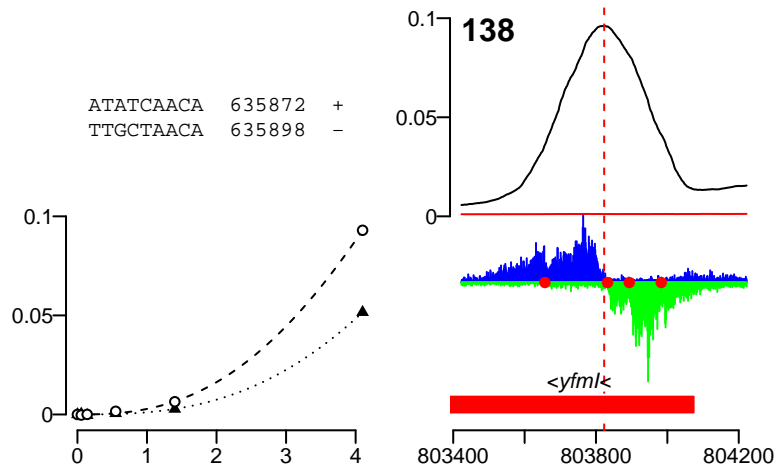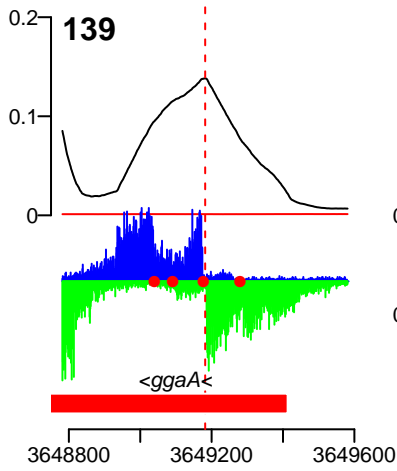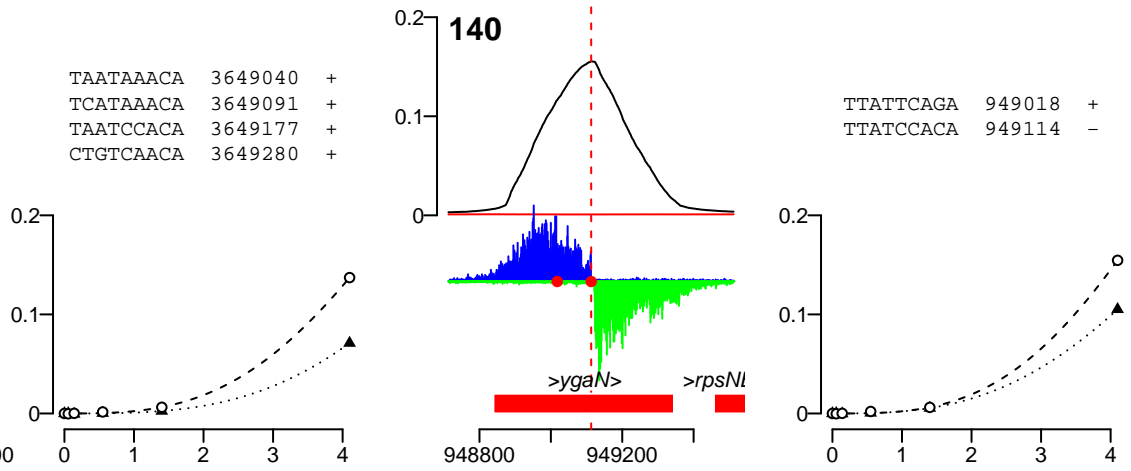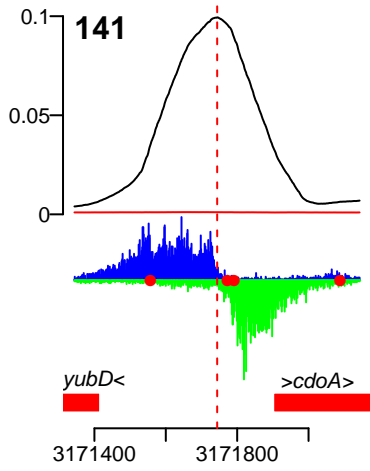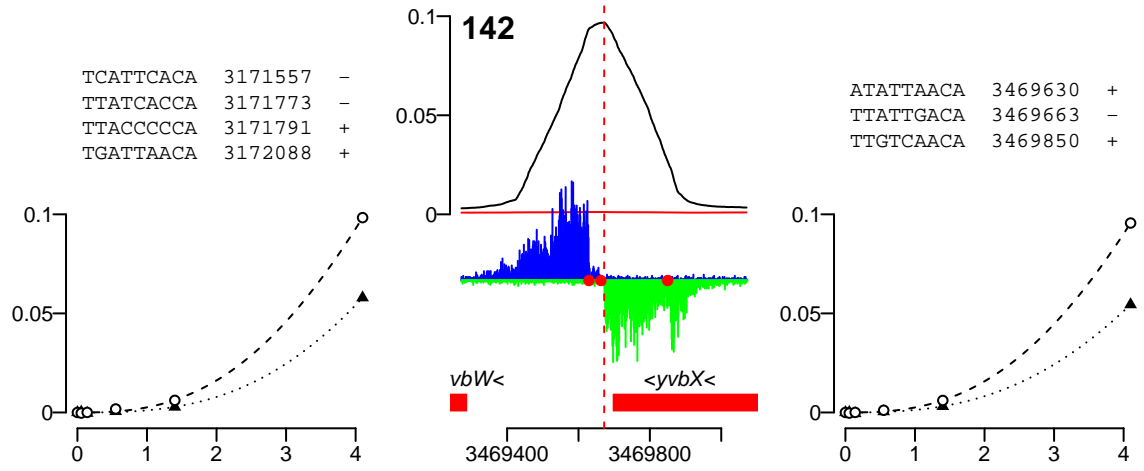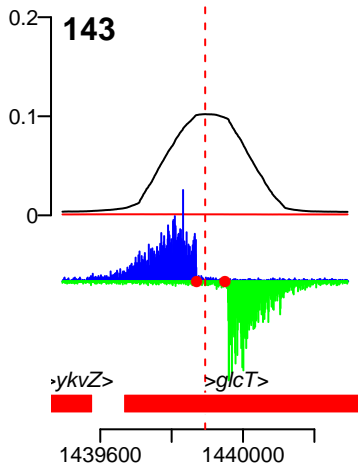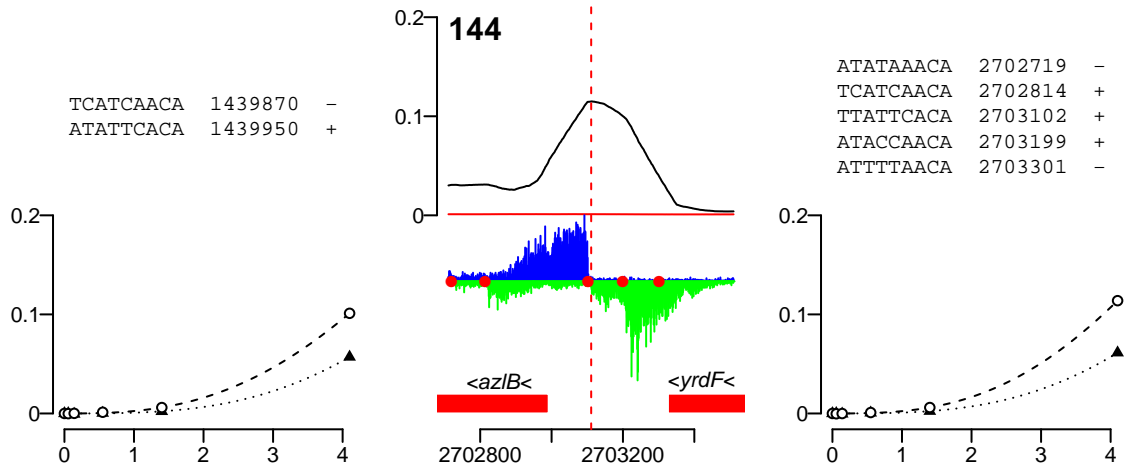

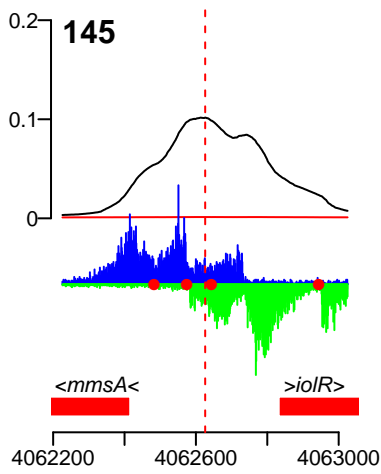

|           |         |   |
|-----------|---------|---|
| ATATCCACT | 4062483 | + |
| TCATGCACA | 4062574 | + |
| TCATAAACA | 4062643 | + |
| ATATCAACA | 4062944 | + |

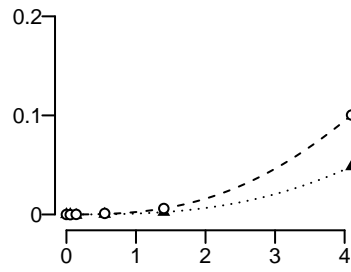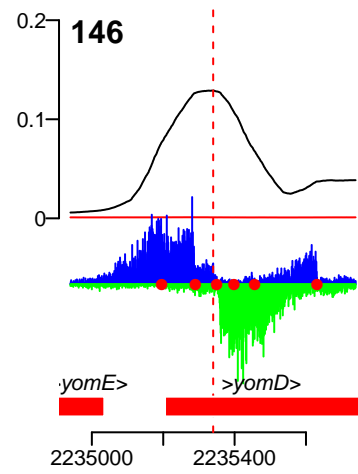

|            |         |   |
|------------|---------|---|
| CTATCCACC  | 2235196 | - |
| ACATTCACA  | 2235290 | + |
| ATAATCACA  | 2235350 | + |
| TTGTCCAGA  | 2235399 | + |
| and 2 more |         |   |

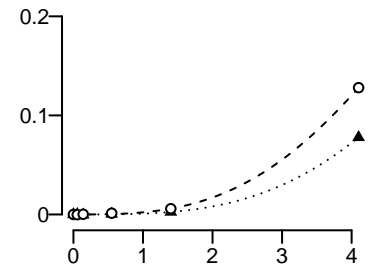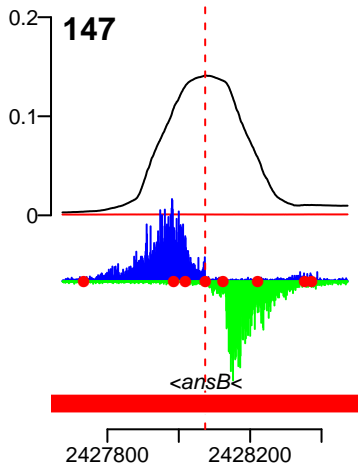

|            |         |   |
|------------|---------|---|
| GCATCAACA  | 2427734 | + |
| TTAATAACA  | 2427986 | + |
| TTAAACACA  | 2428019 | + |
| ATTTCCACA  | 2428075 | - |
| and 4 more |         |   |

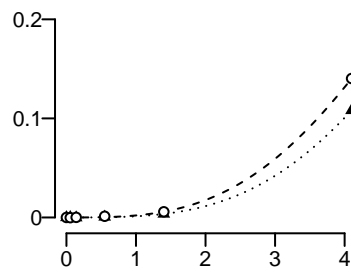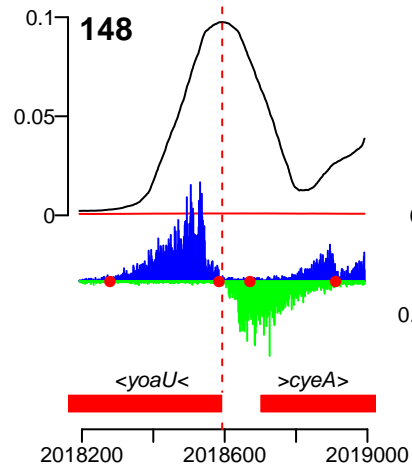

|            |         |   |
|------------|---------|---|
| GTTTCACA   | 2018279 | - |
| TTATGAACA  | 2018584 | - |
| ATTTTAAACA | 2018671 | + |
| CCATCAACA  | 2018911 | - |

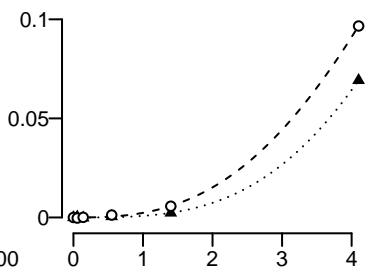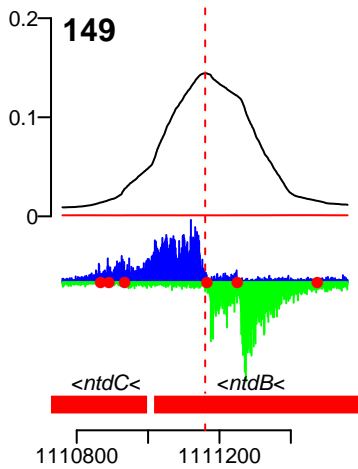

|            |         |   |
|------------|---------|---|
| GTTTCACA   | 1110867 | + |
| AAATCAACA  | 1110891 | - |
| TTATCTACA  | 1110935 | - |
| CTATCCCA   | 1111165 | + |
| and 2 more |         |   |

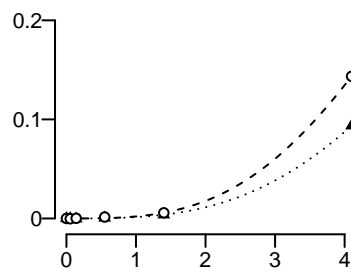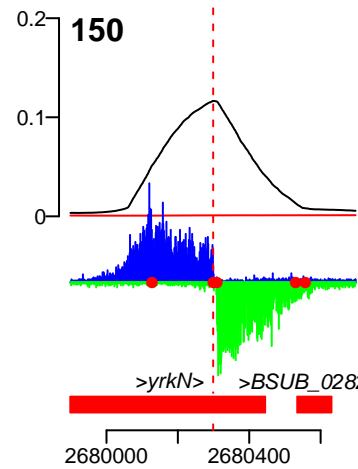

|           |         |   |
|-----------|---------|---|
| GTATCAACA | 2680128 | + |
| TTATTCACA | 2680300 | - |
| AAATCCACA | 2680310 | - |
| TTTTAAACA | 2680530 | - |
| TCATAAACA | 2680557 | + |

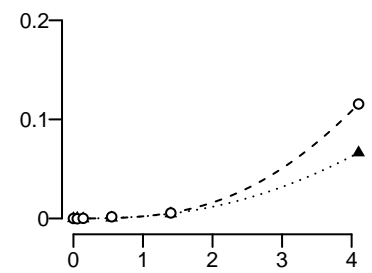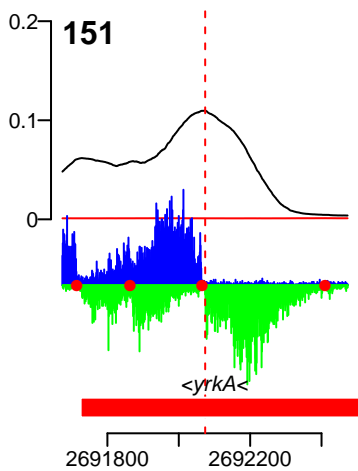

|           |         |   |
|-----------|---------|---|
| TTATCCAGA | 2691714 | + |
| GTATCCACT | 2691864 | + |
| TCATCCACA | 2692065 | + |
| TTATTTACA | 2692410 | + |

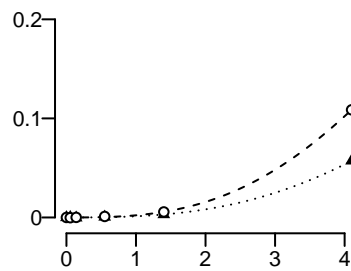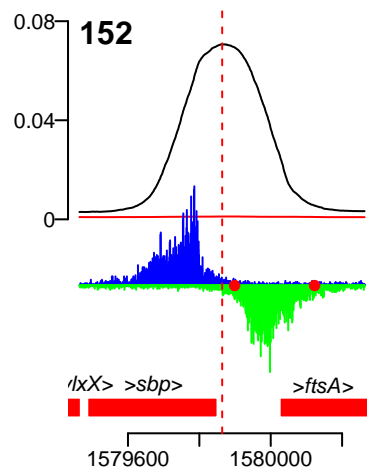

|           |         |   |
|-----------|---------|---|
| CTTTTCACA | 1579899 | - |
| TTTCCACA  | 1580123 | - |

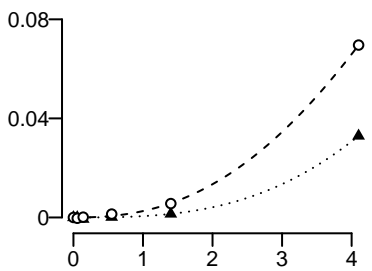

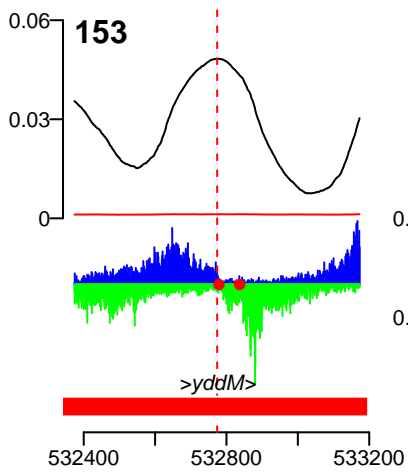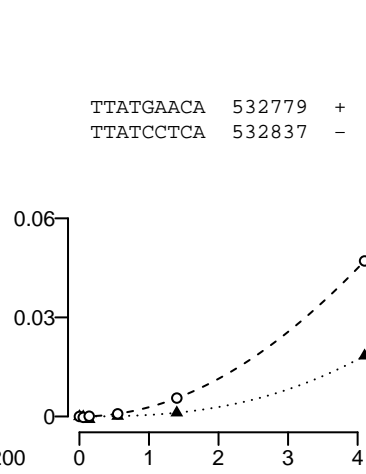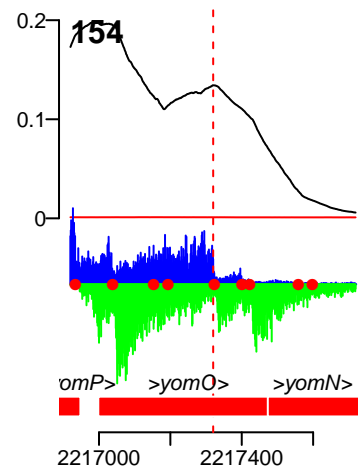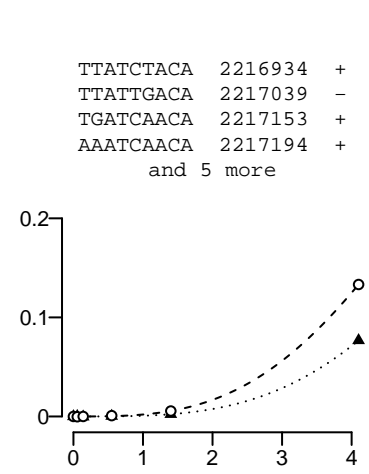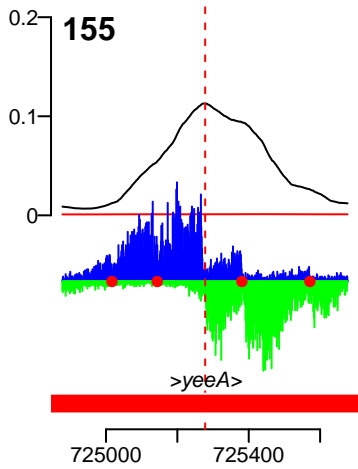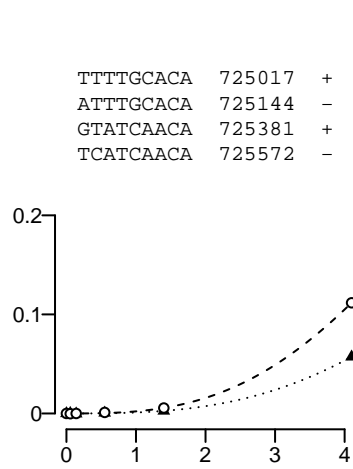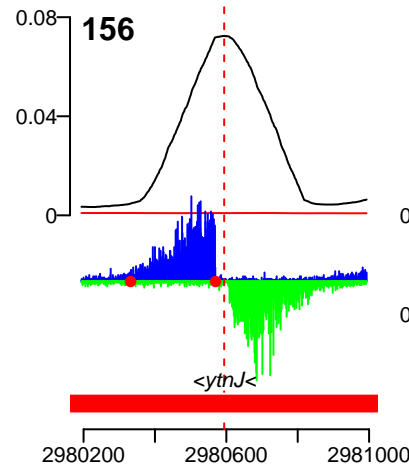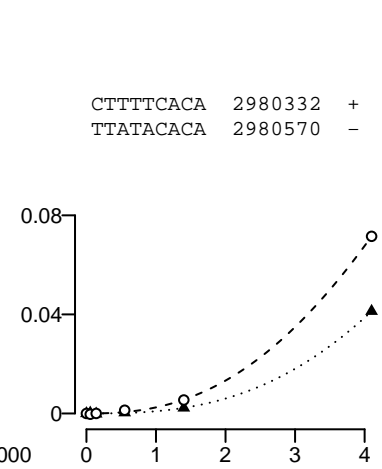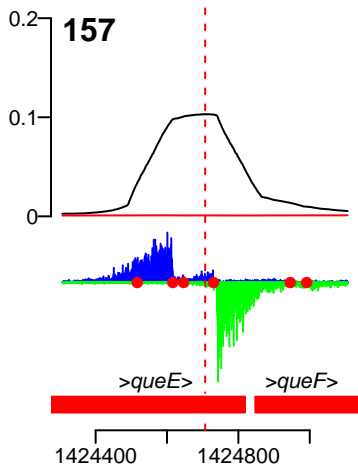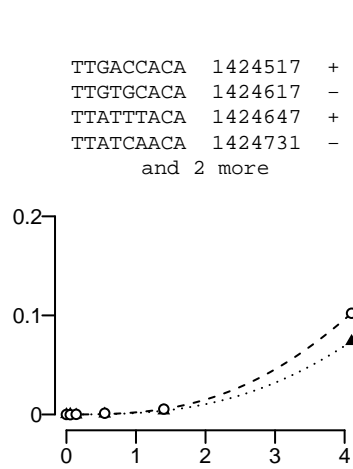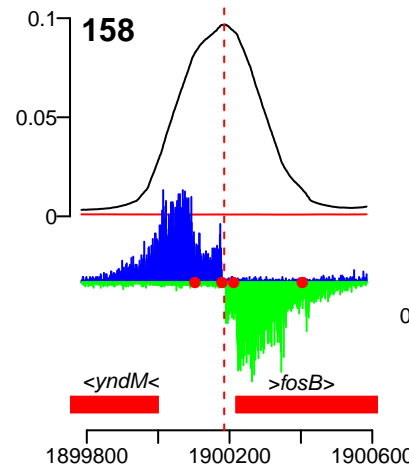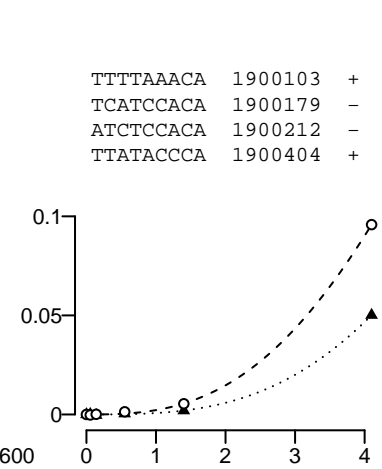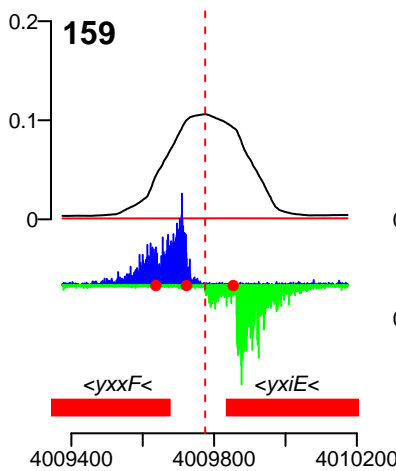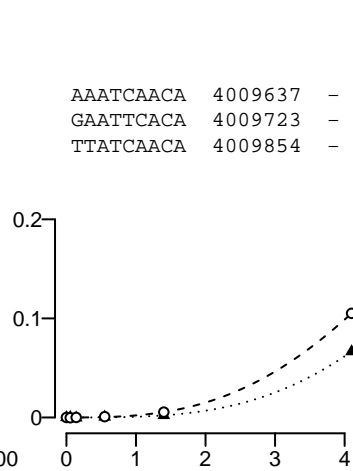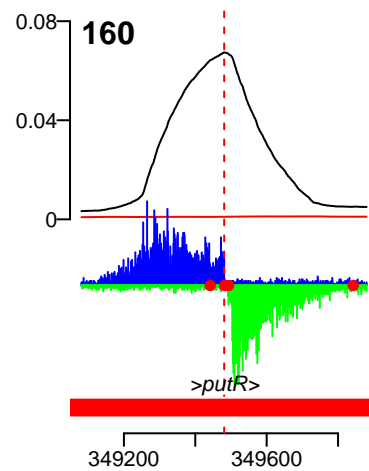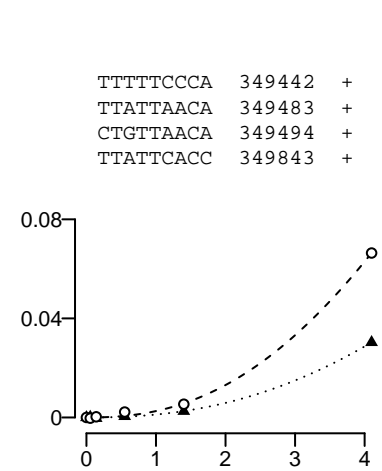

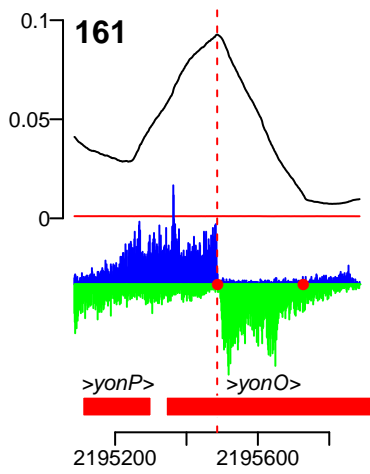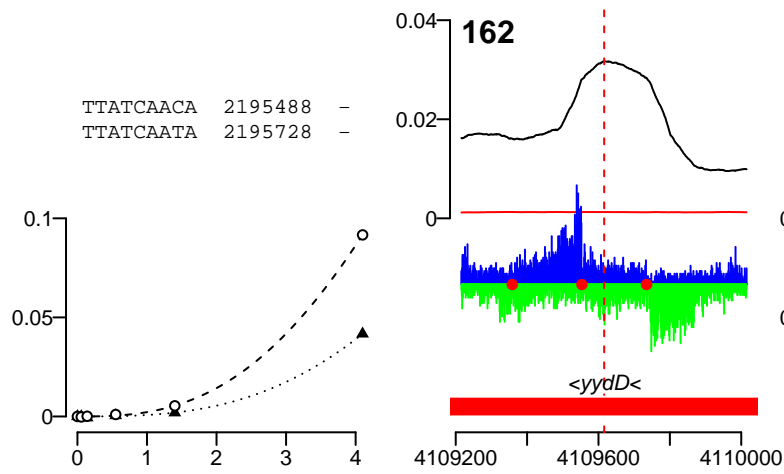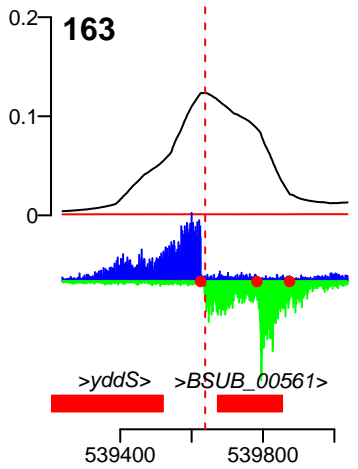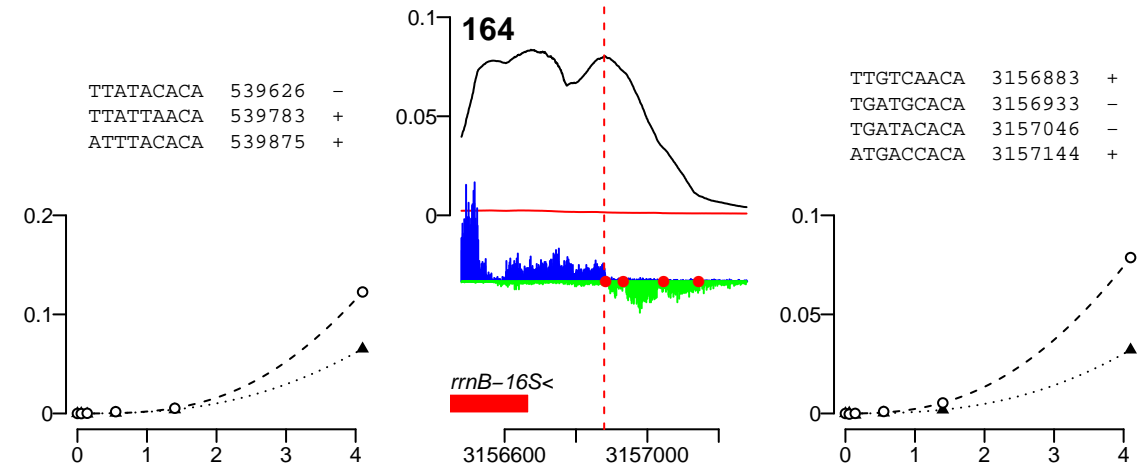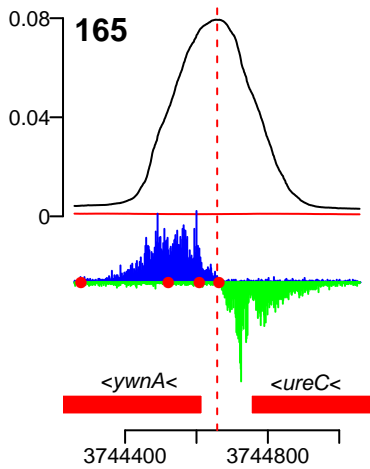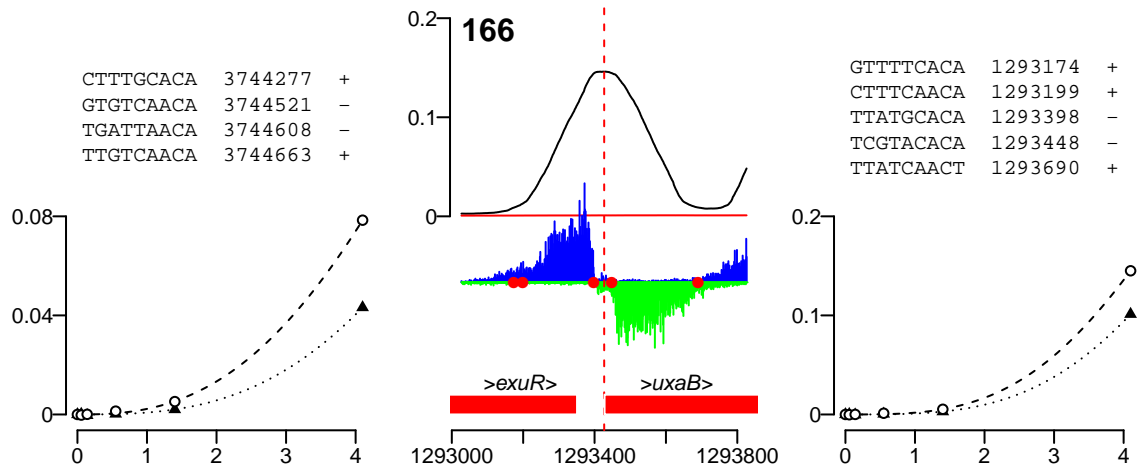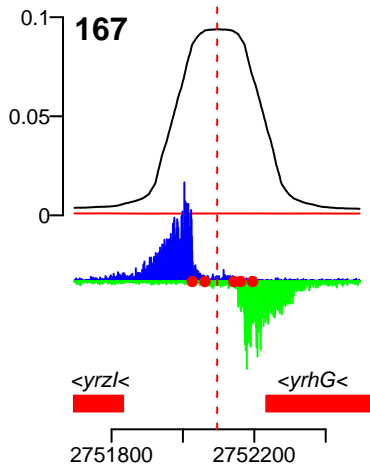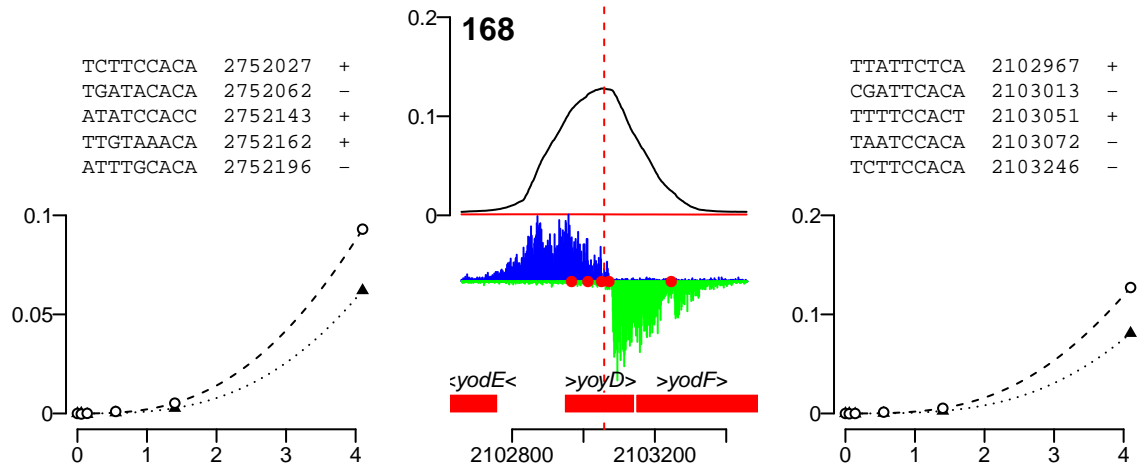

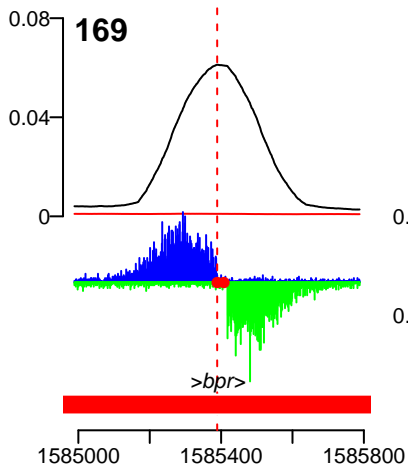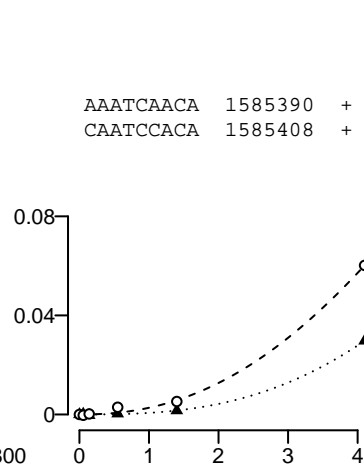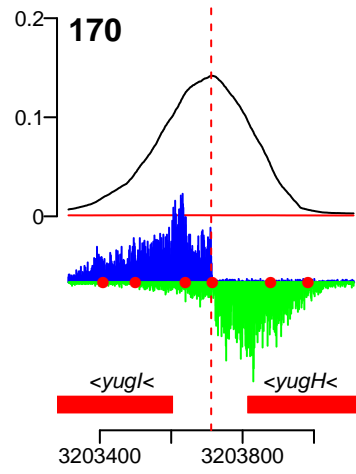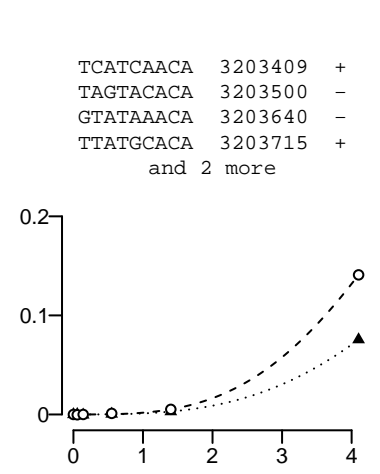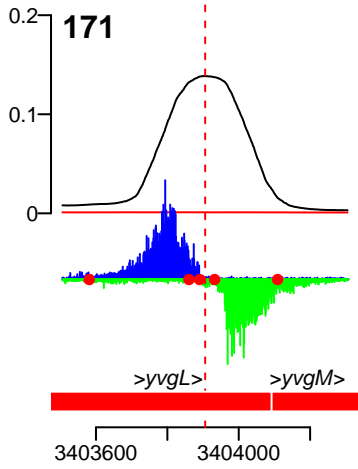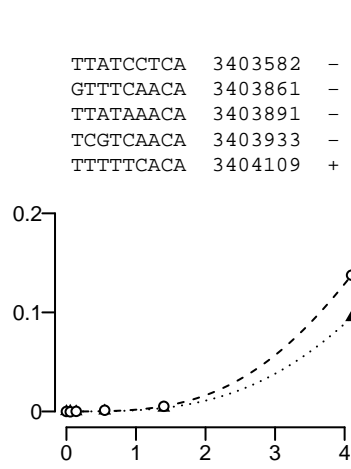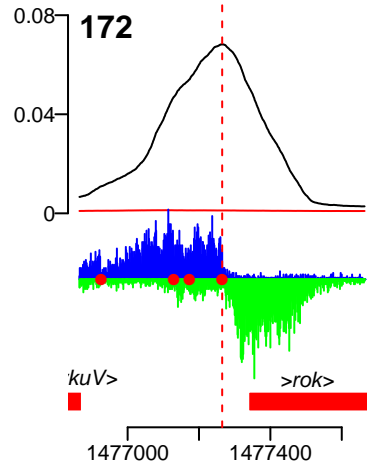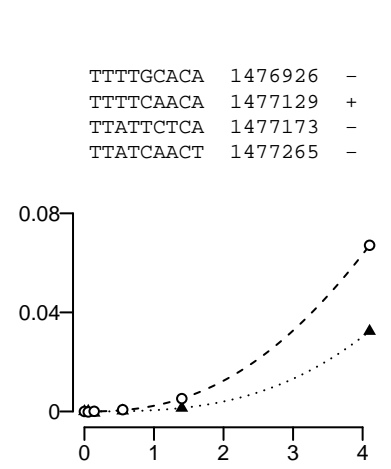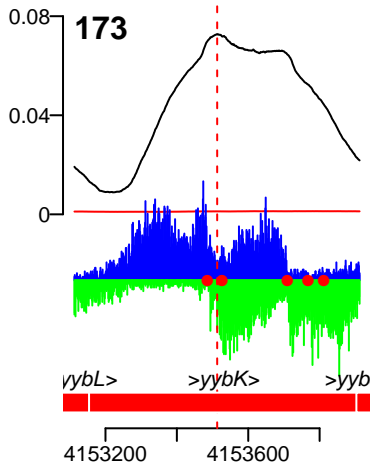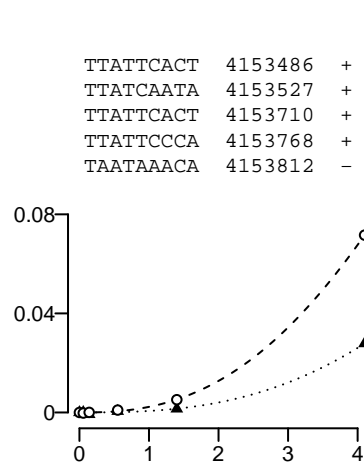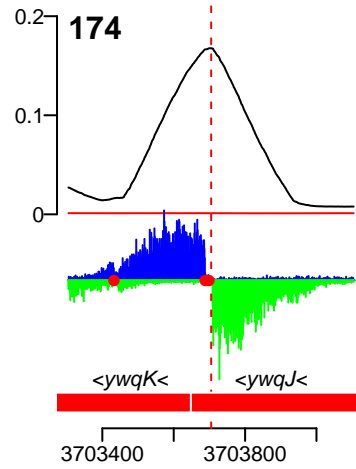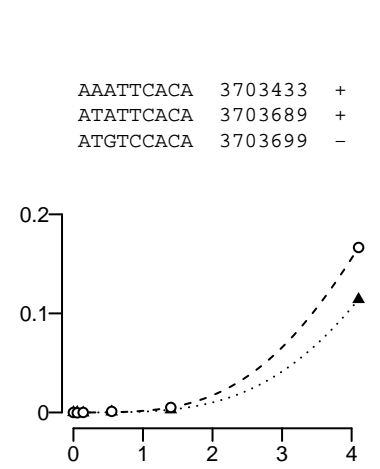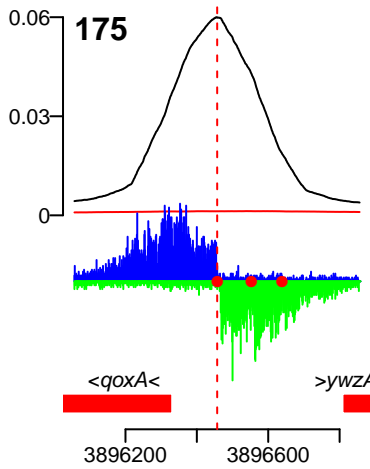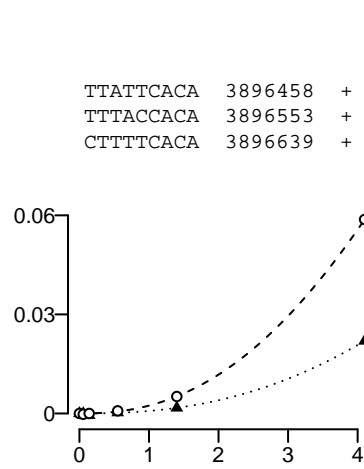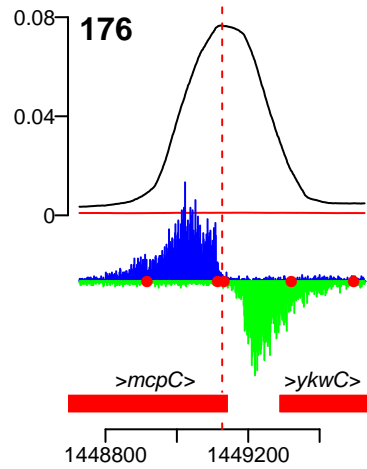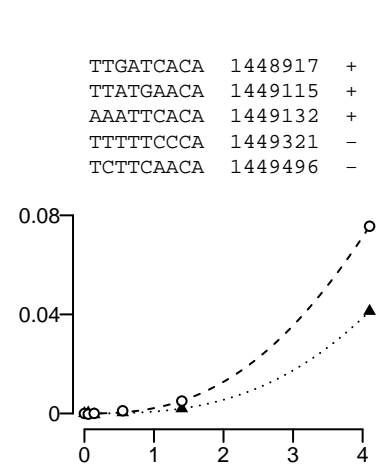

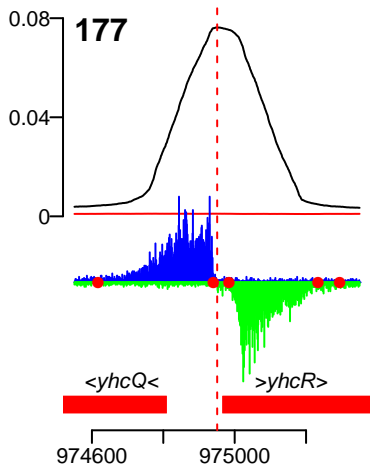

|           |        |   |
|-----------|--------|---|
| TCGTCAACA | 974617 | - |
| TTATACACA | 974940 | - |
| TGATCAACA | 974984 | - |
| ATTTGCACA | 975234 | - |
| TTTTTCCCA | 975294 | - |

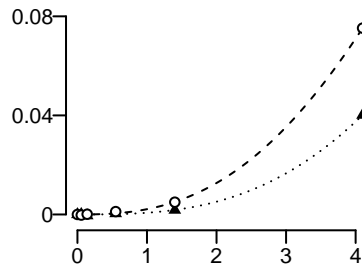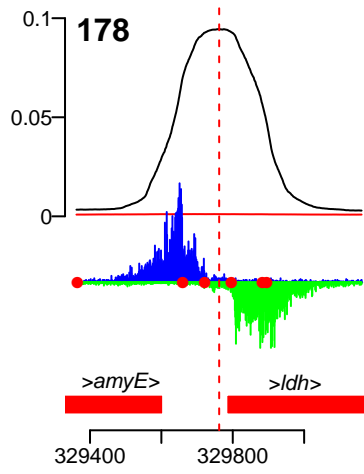

|            |        |   |
|------------|--------|---|
| CTATAAACA  | 329365 | + |
| TTATGAACA  | 329660 | - |
| TATTTCAACA | 329722 | - |
| TTATTTACA  | 329796 | - |
| and 2 more |        |   |

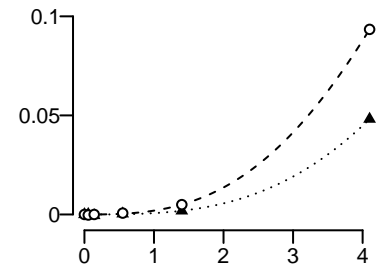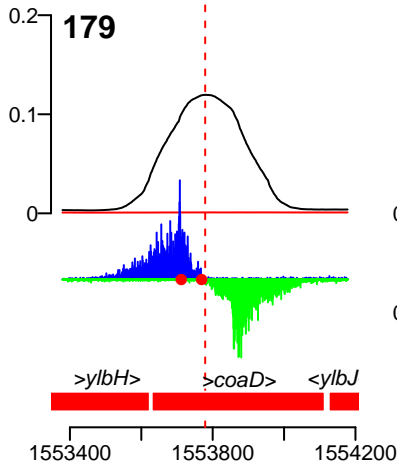

|           |         |   |
|-----------|---------|---|
| TTTTGAACA | 1553712 | + |
| TCTTCCACA | 1553769 | - |

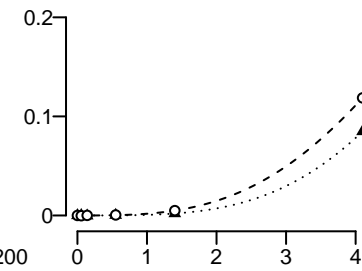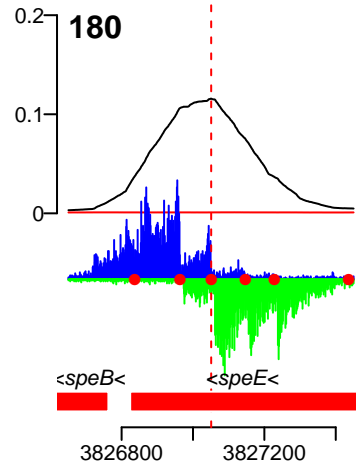

|            |         |   |
|------------|---------|---|
| TCACTCACA  | 3826837 | + |
| ATGTCCACA  | 3826964 | + |
| TTAATCACA  | 3827052 | - |
| TTGTAAACA  | 3827147 | + |
| and 2 more |         |   |

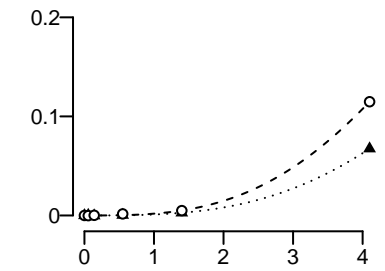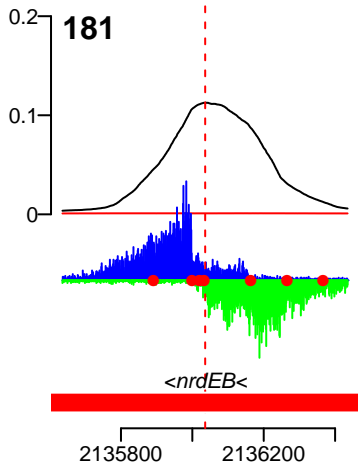

|            |         |   |
|------------|---------|---|
| TCATAAACA  | 2135891 | + |
| TTATAAACA  | 2135999 | + |
| ATTTCAACA  | 2136020 | + |
| TCATAAACA  | 2136033 | + |
| and 3 more |         |   |

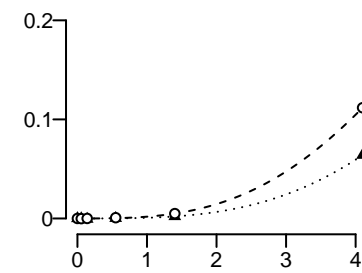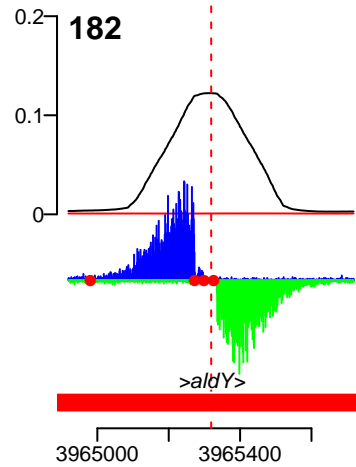

|            |         |   |
|------------|---------|---|
| TTGTTCAACA | 3964981 | + |
| GCATCCACA  | 3965273 | - |
| TTATTCACC  | 3965299 | + |
| TTATCAACA  | 3965326 | + |

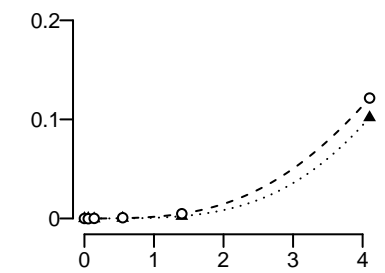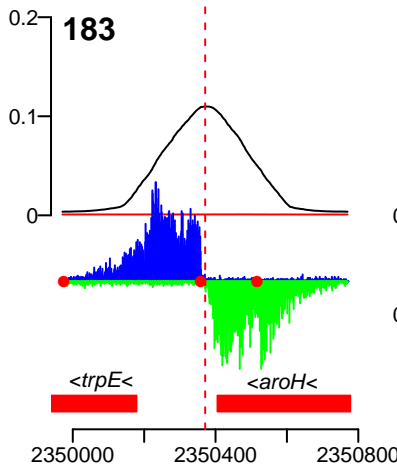

|           |         |   |
|-----------|---------|---|
| TTTCTCACA | 2349975 | - |
| TTATACACA | 2350359 | + |
| TTATGCACT | 2350516 | + |

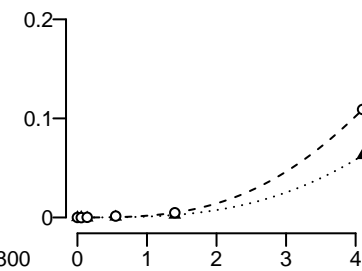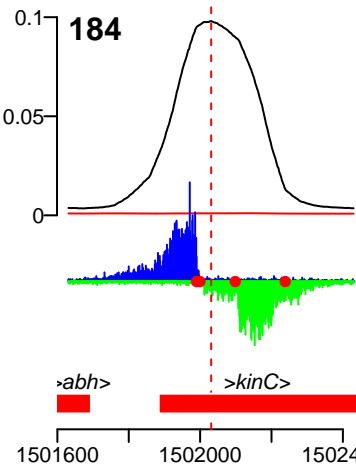

|           |         |   |
|-----------|---------|---|
| ATATCAACA | 1501991 | - |
| GTATACACA | 1502000 | - |
| GTATAAACA | 1502099 | + |
| TTGTTCCCA | 1502239 | - |

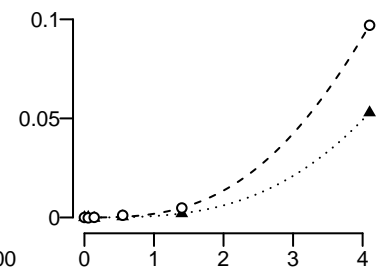

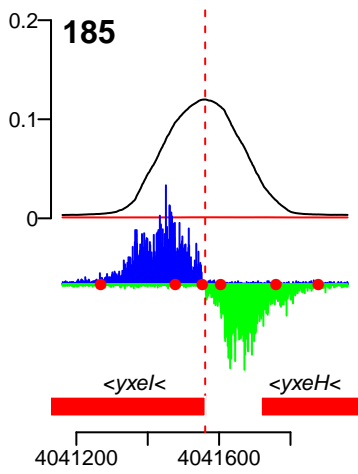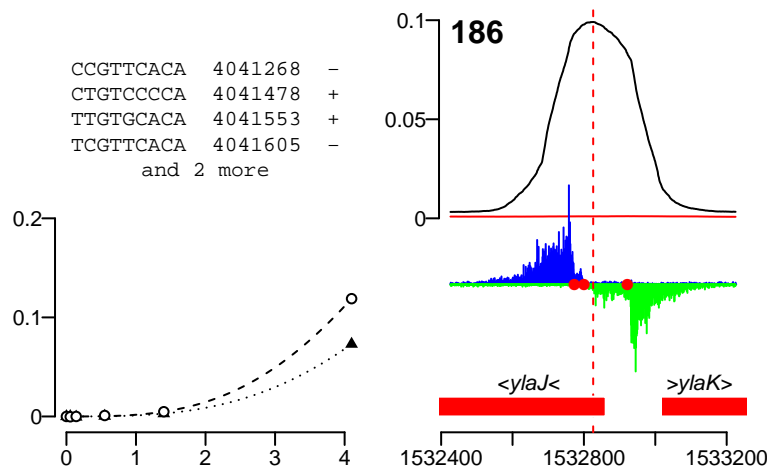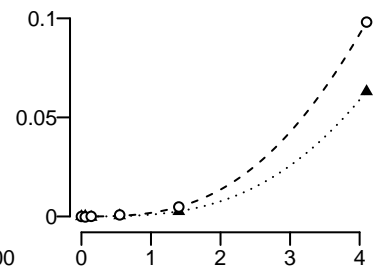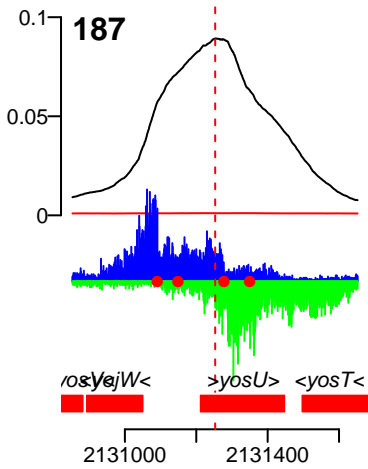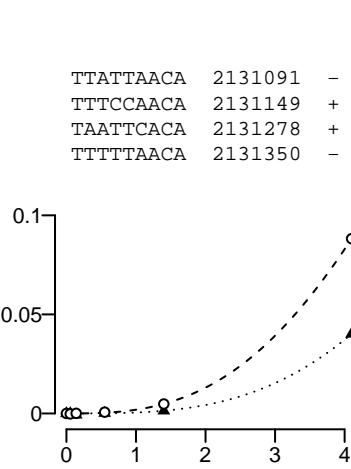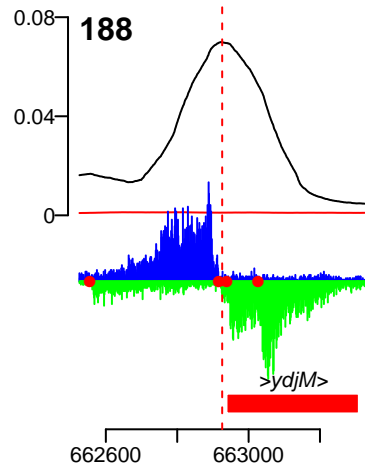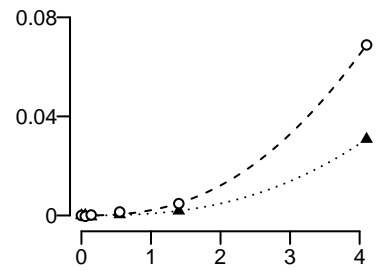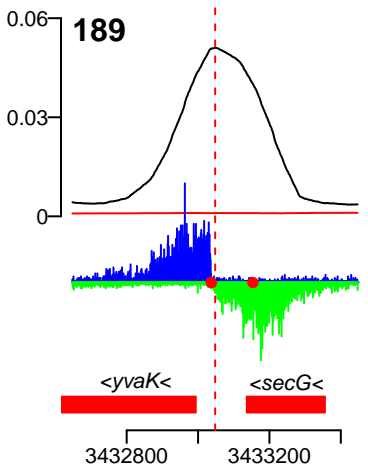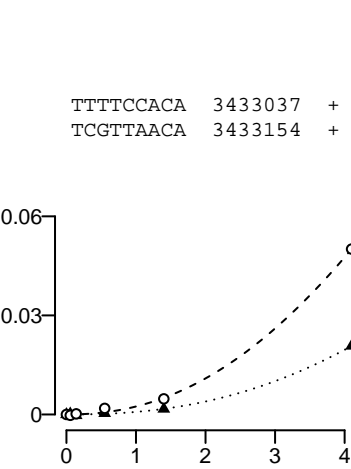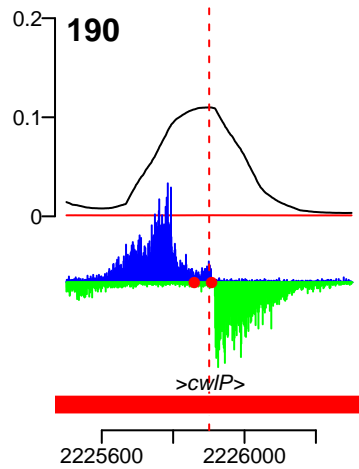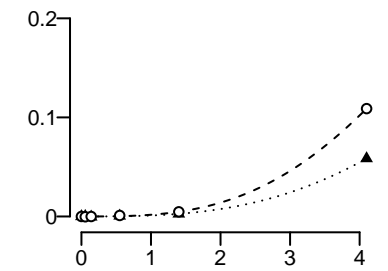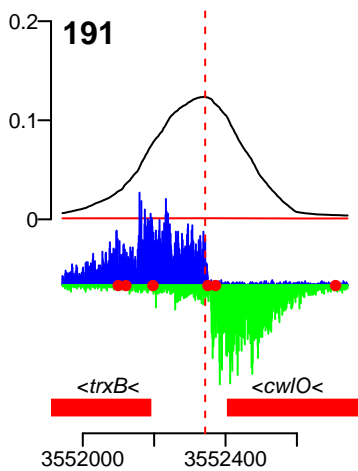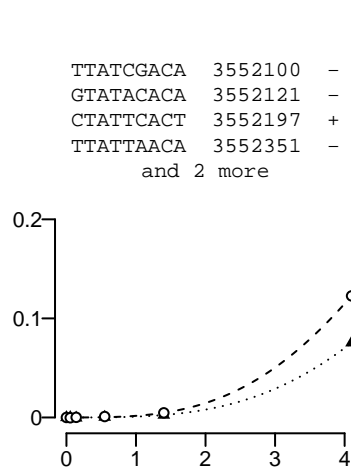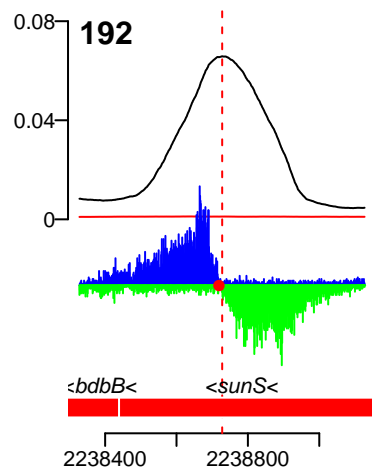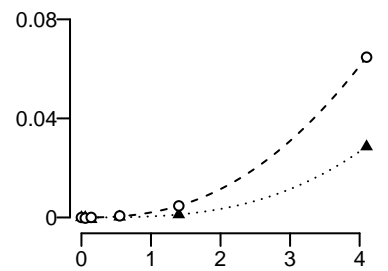



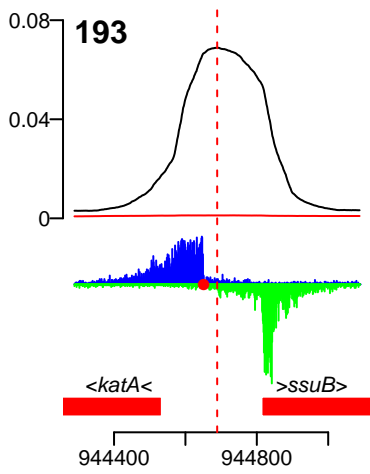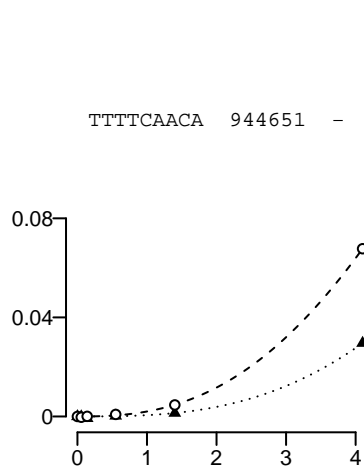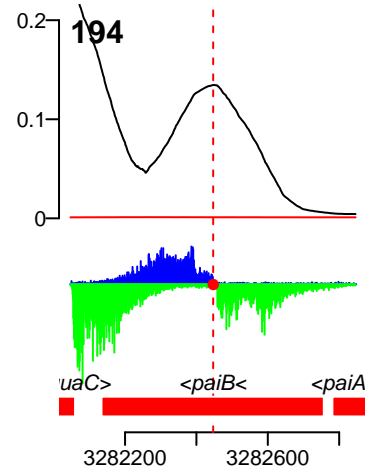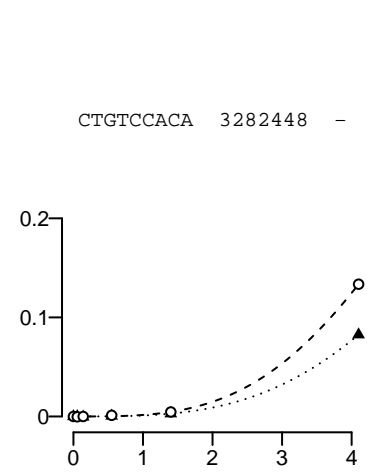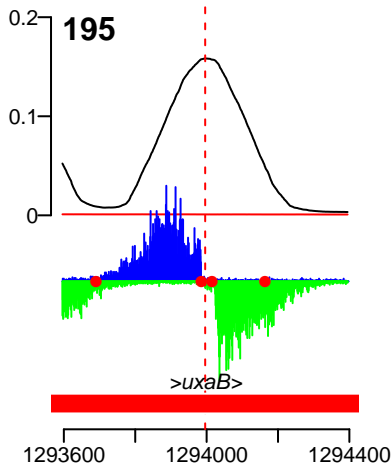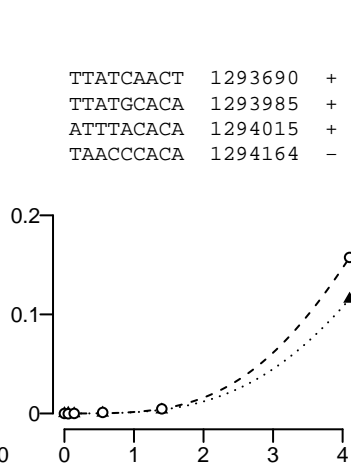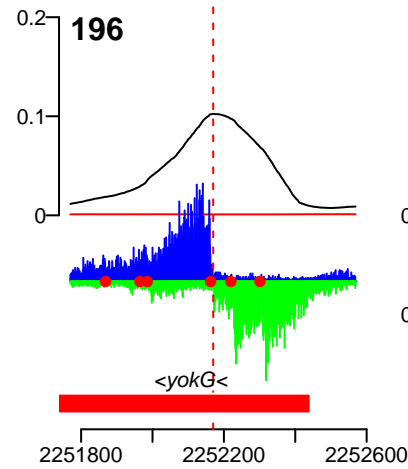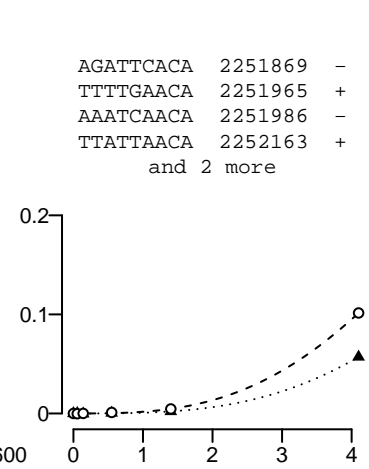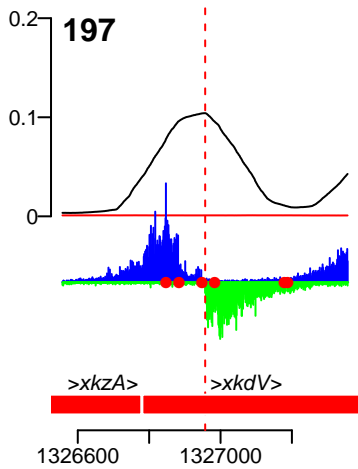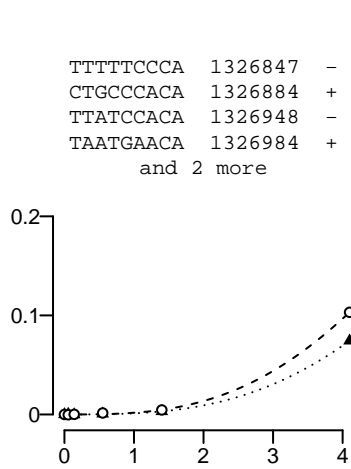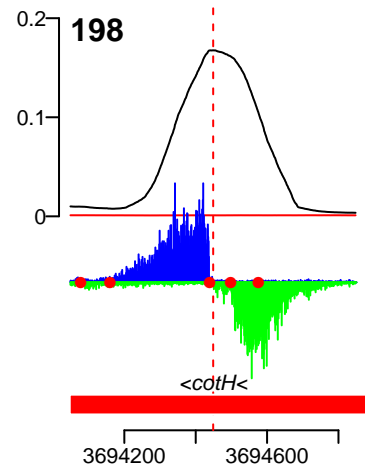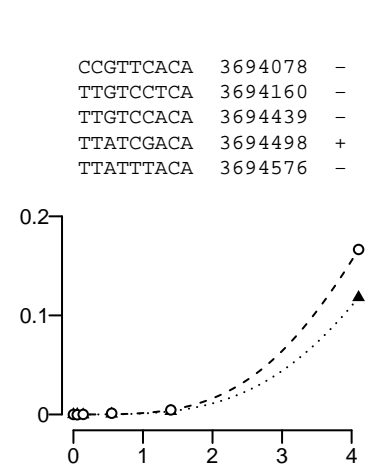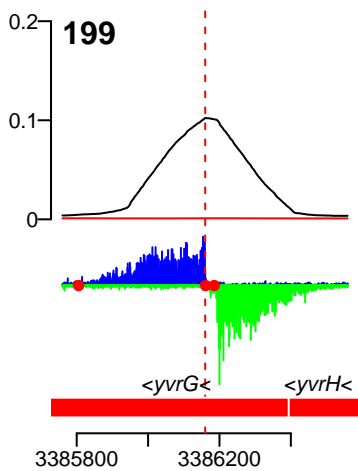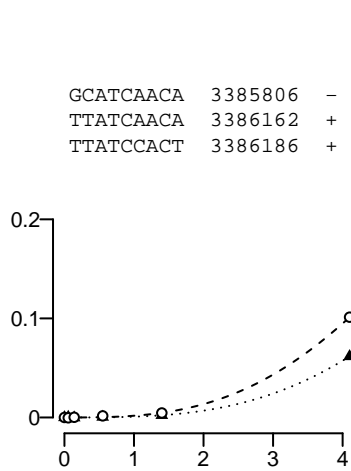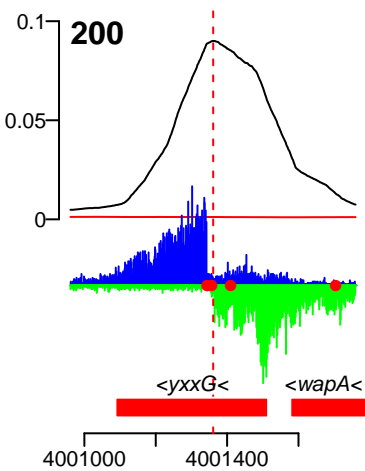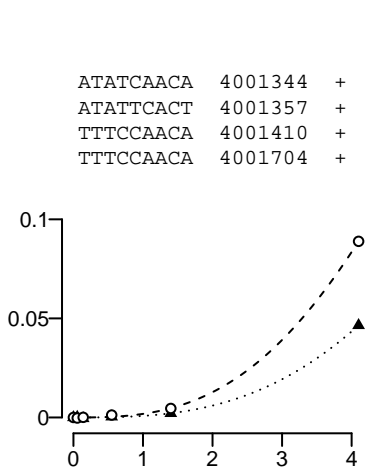

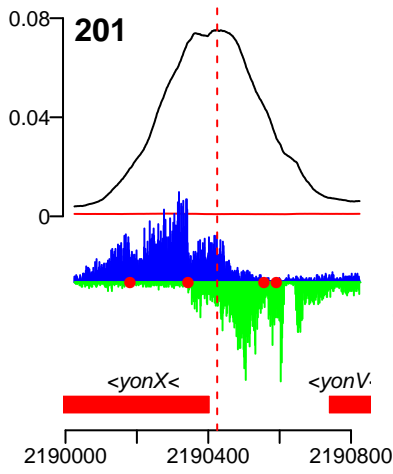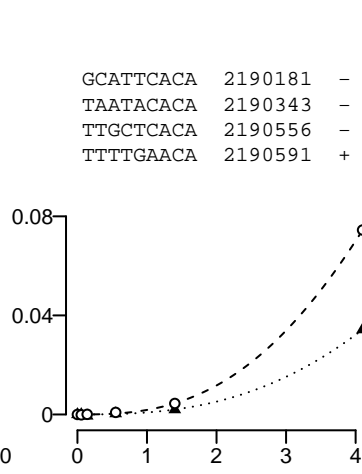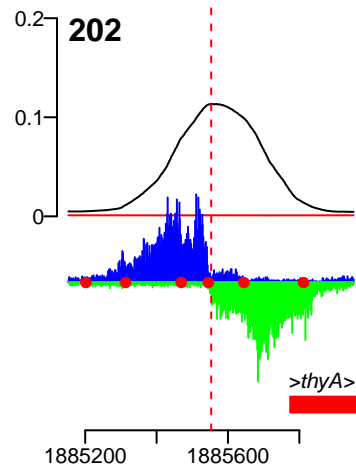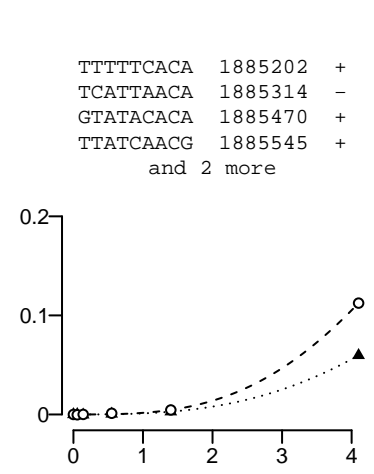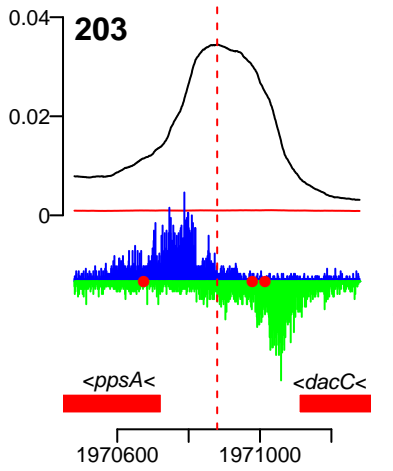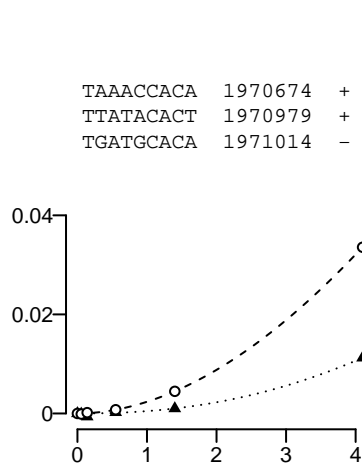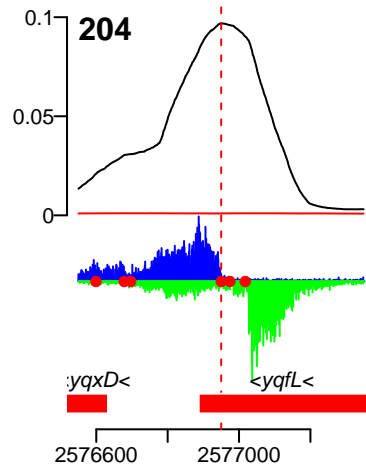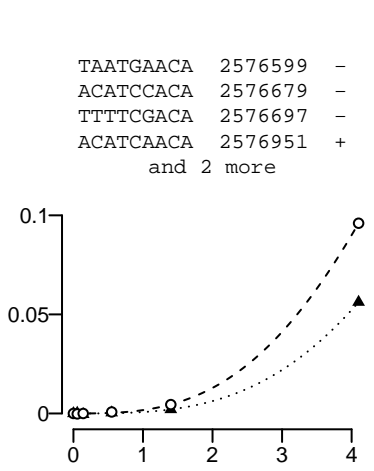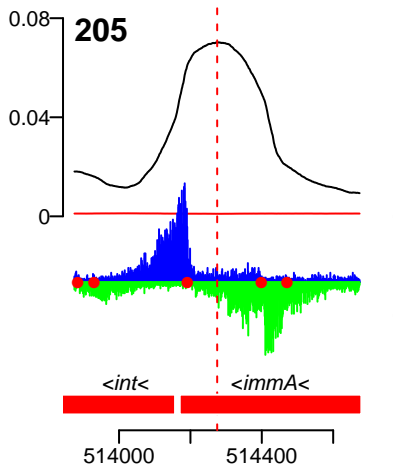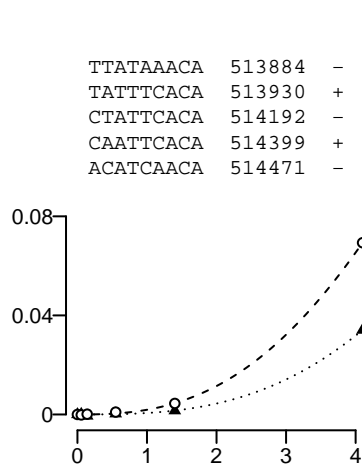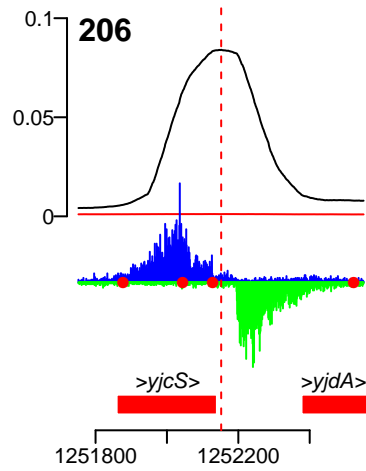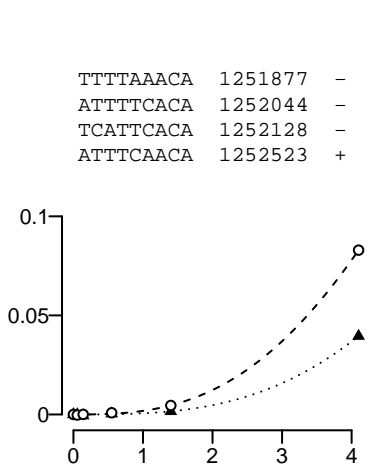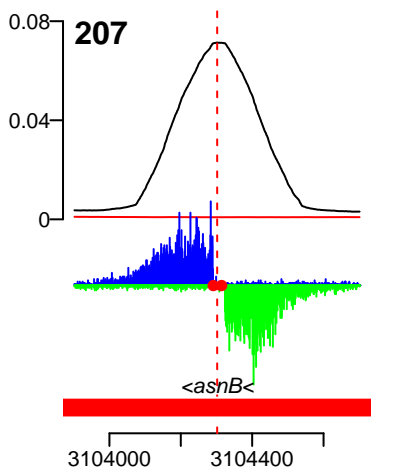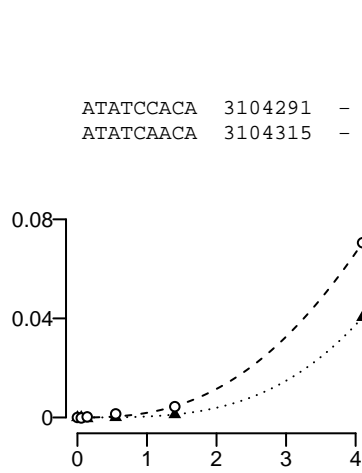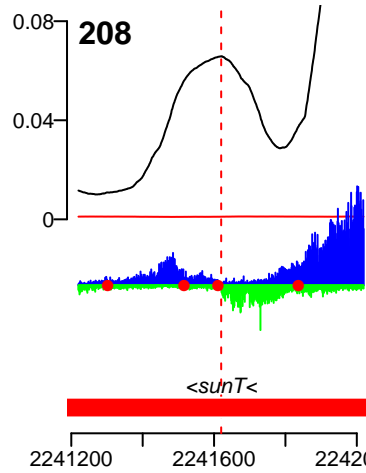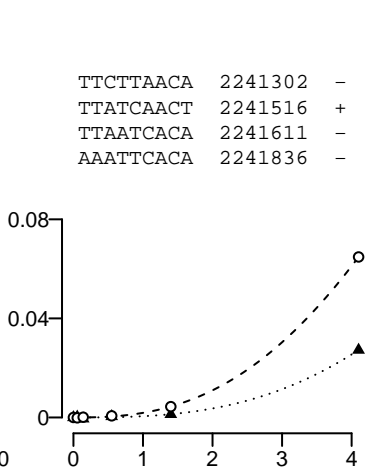

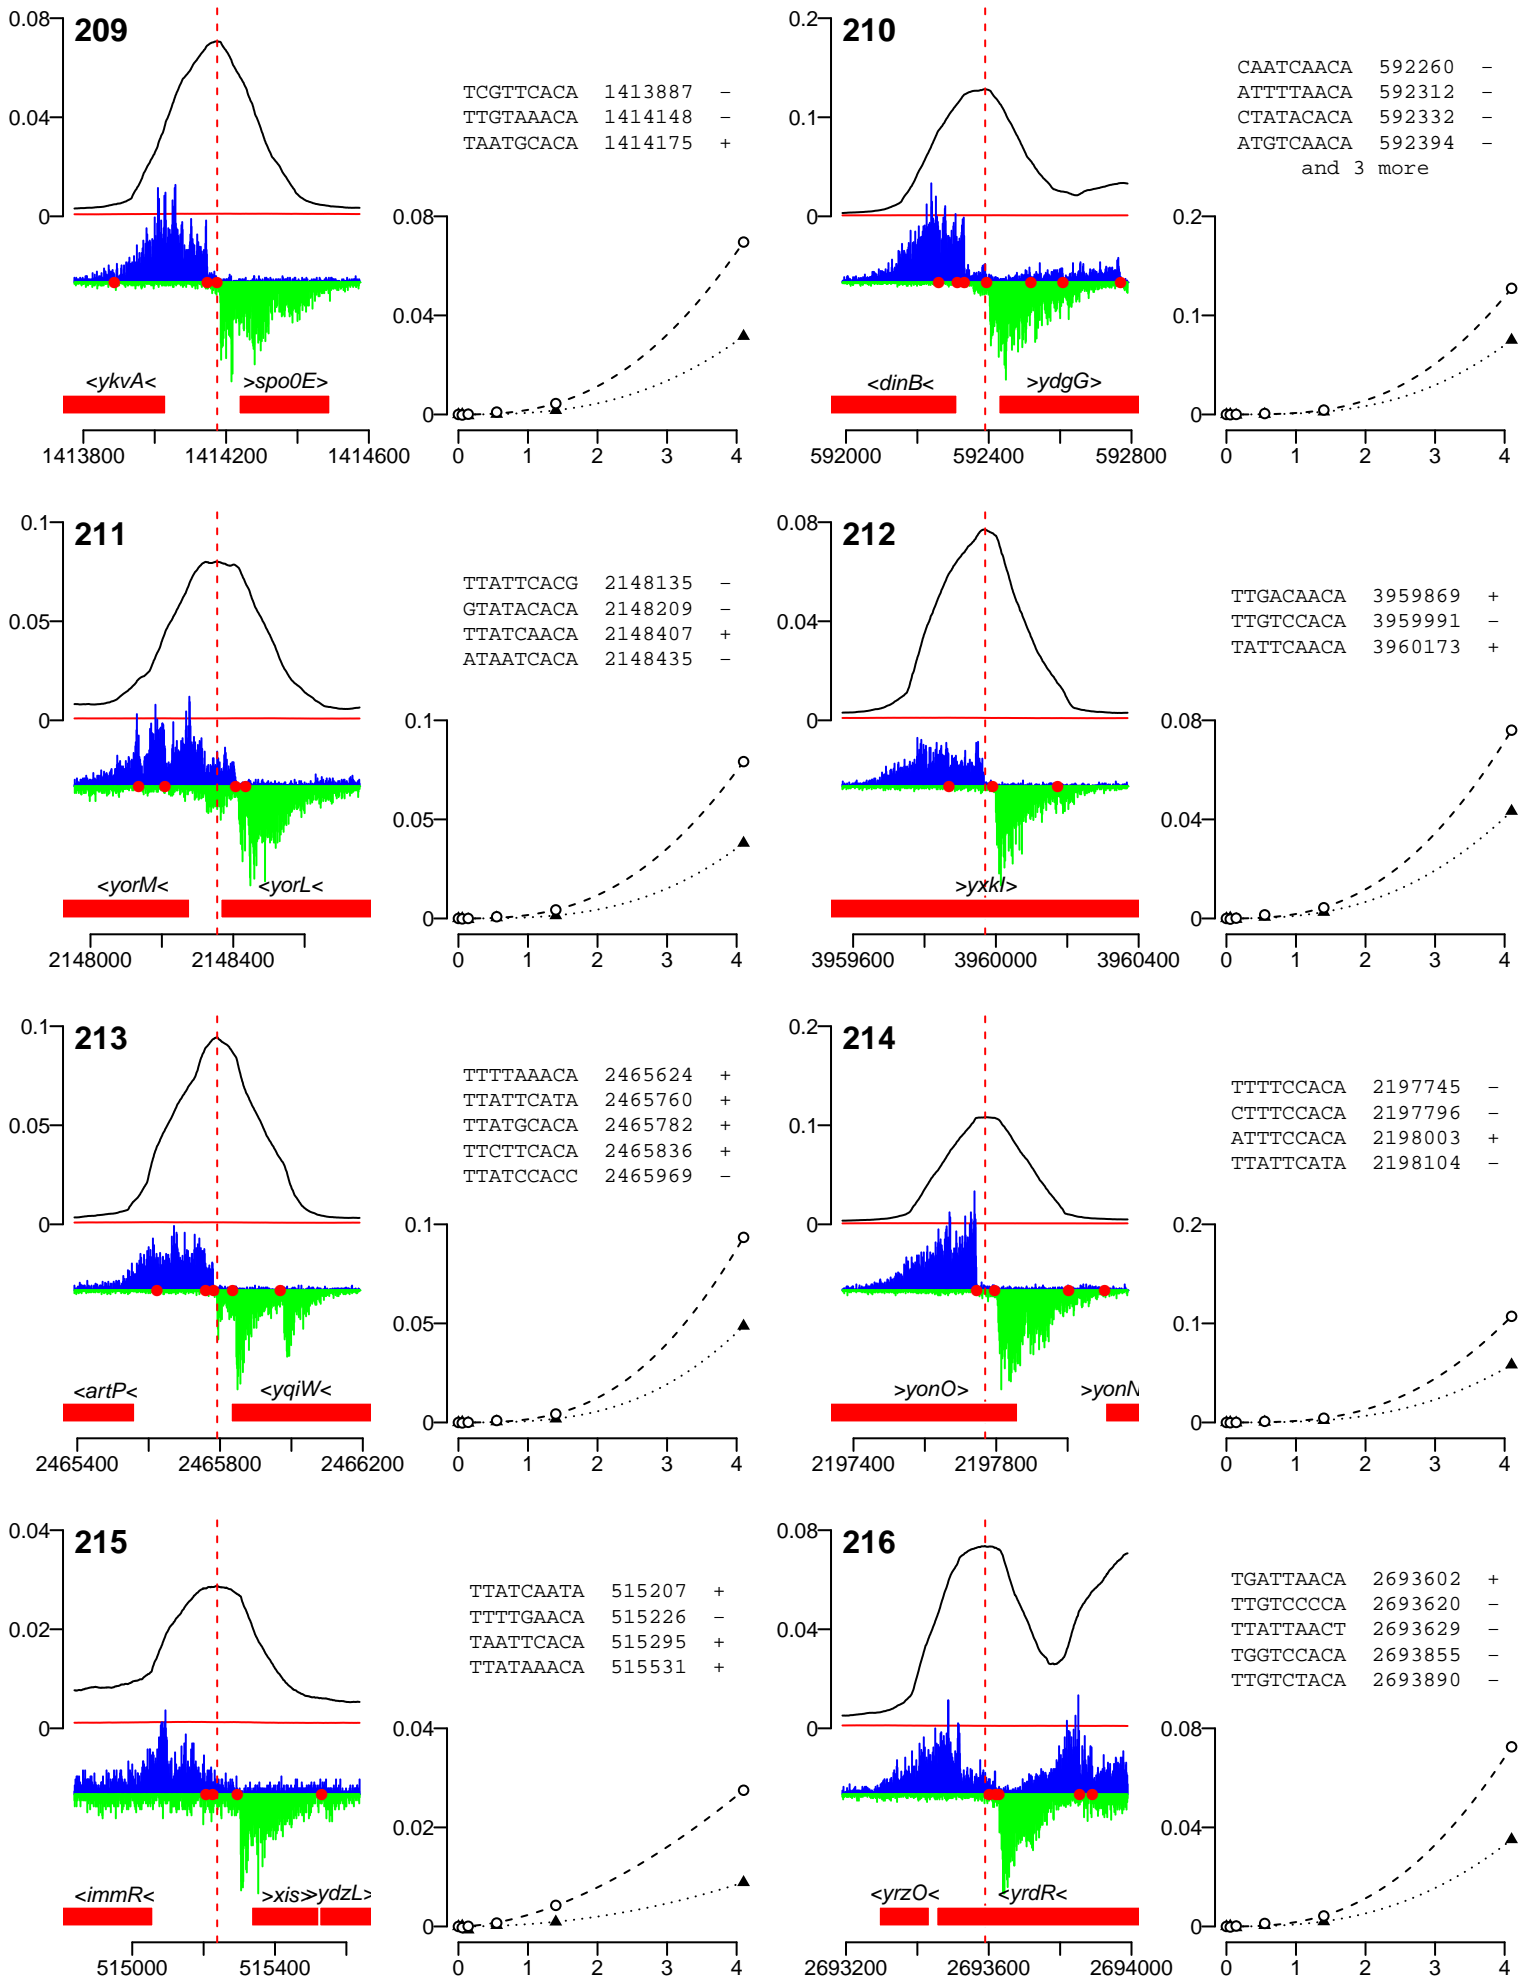

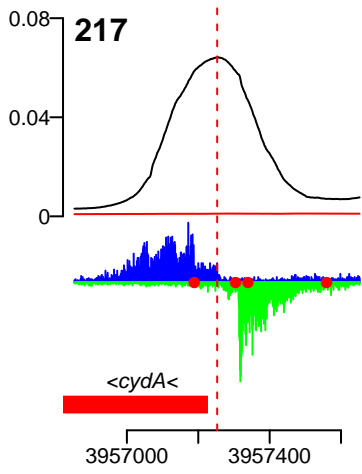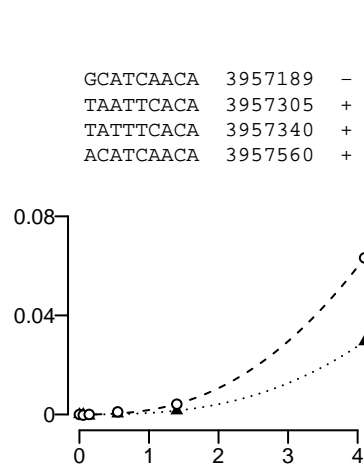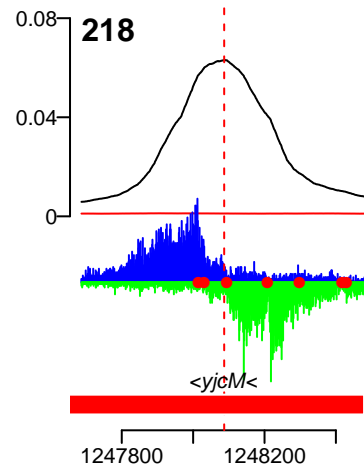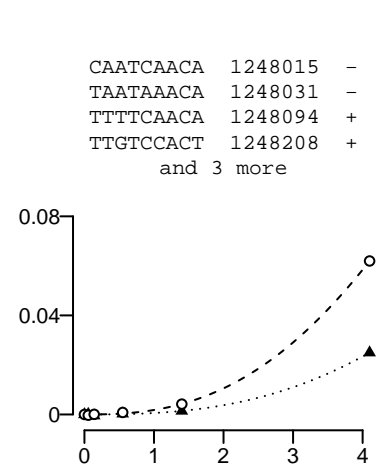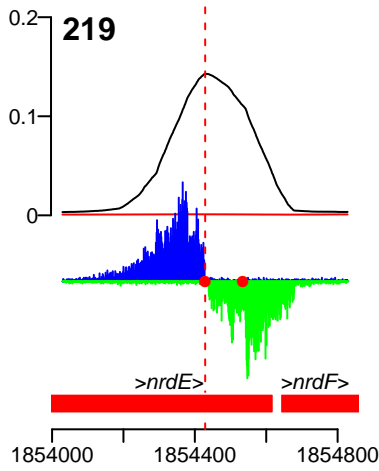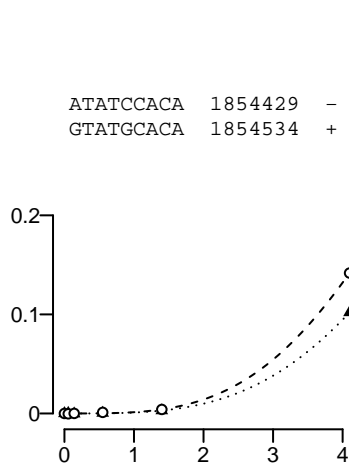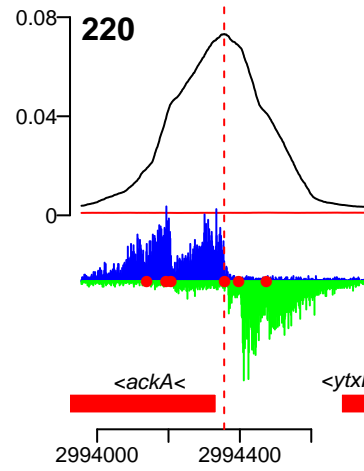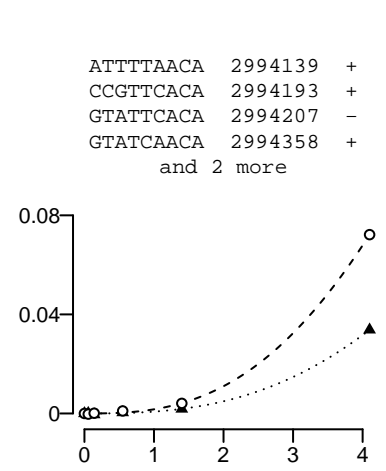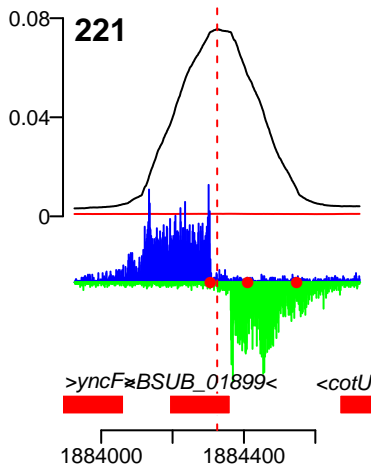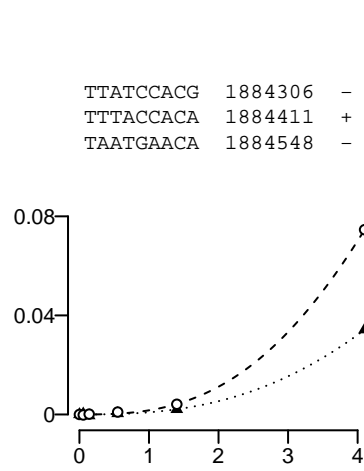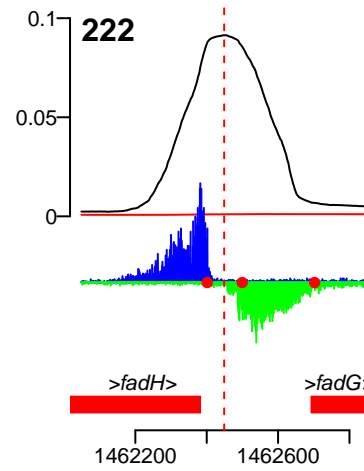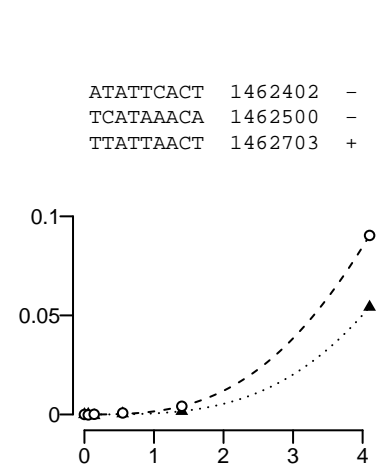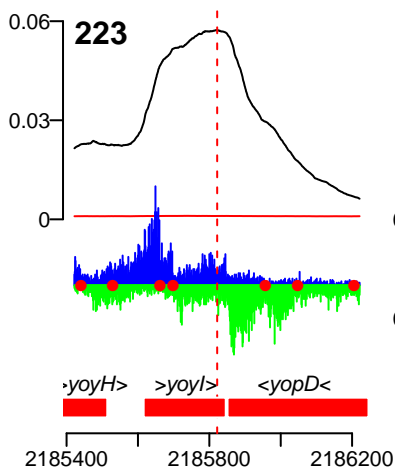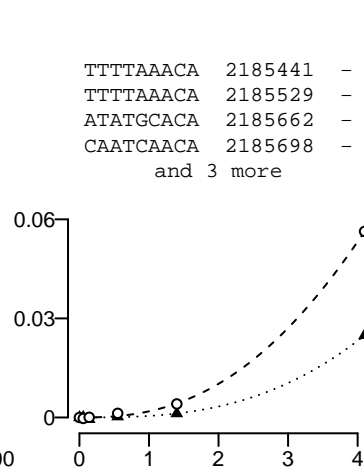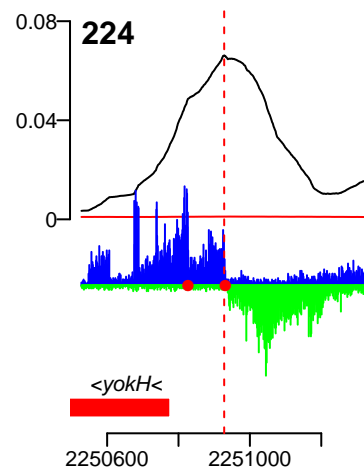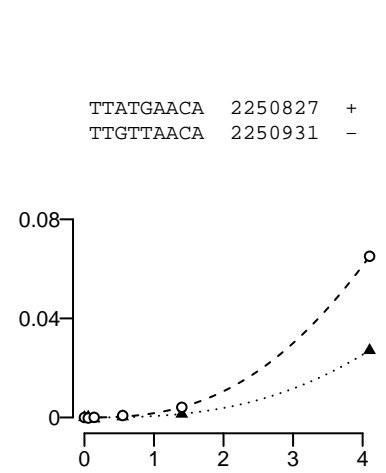

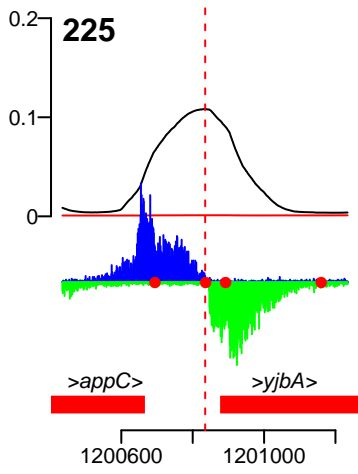

|           |         |   |
|-----------|---------|---|
| ATATCACCA | 1200695 | + |
| TTGTCCACA | 1200837 | - |
| TGACCCACA | 1200893 | - |
| GTGTCAACA | 1201161 | - |

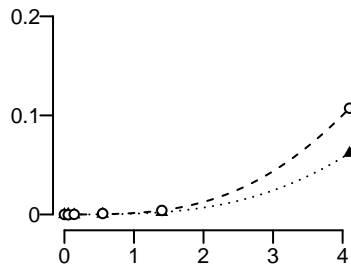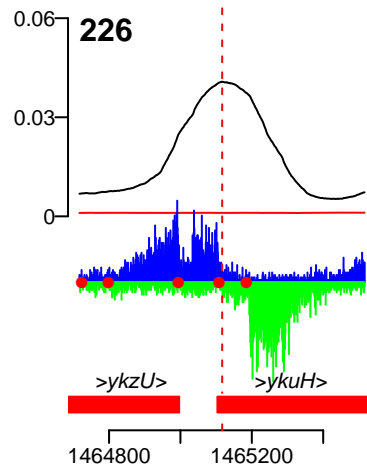

|           |         |   |
|-----------|---------|---|
| TAATGCACA | 1464723 | + |
| TTATTTACA | 1464798 | - |
| TTATTCAGA | 1464994 | - |
| TTTTAACA  | 1465108 | - |
| TTTTCCCA  | 1465185 | + |

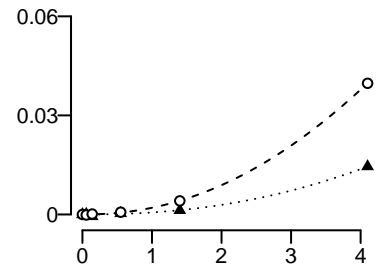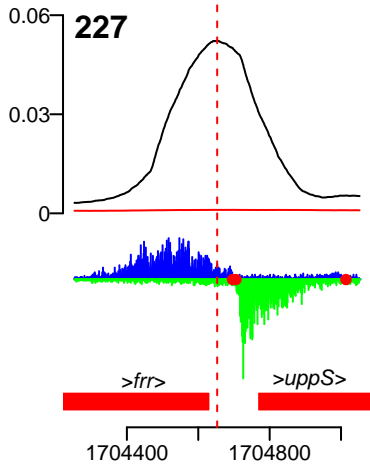

|           |         |   |
|-----------|---------|---|
| GTATTAACA | 1704697 | - |
| TAATCAACA | 1704706 | - |
| TTTTCAACA | 1705014 | + |

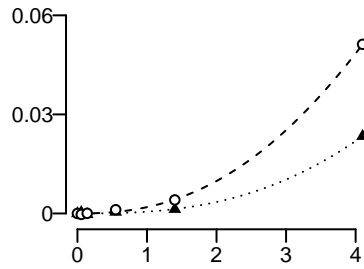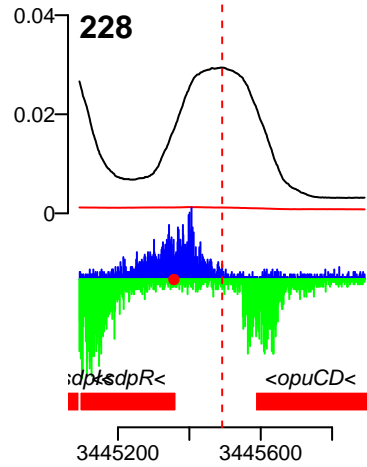

|           |         |   |
|-----------|---------|---|
| TTATTCATA | 3445357 | + |
|-----------|---------|---|

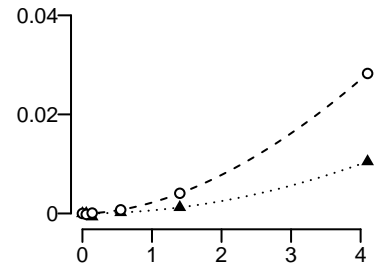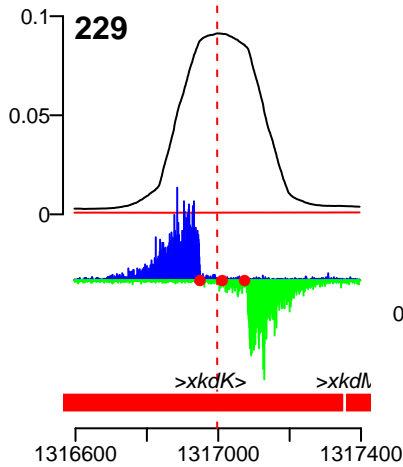

|            |         |   |
|------------|---------|---|
| TTATTCACA  | 1316949 | + |
| ACGTTACACA | 1317012 | + |
| TTATTCACA  | 1317074 | - |

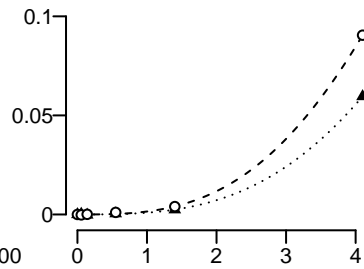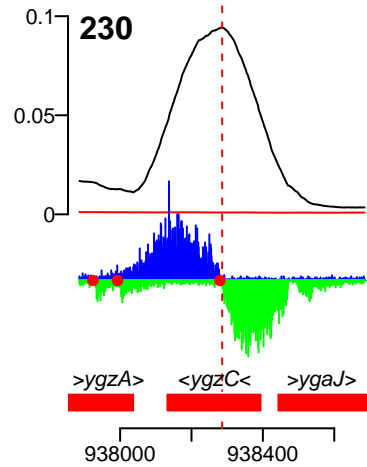

|           |        |   |
|-----------|--------|---|
| ATATAAACA | 937924 | + |
| TTATAAACA | 937993 | - |
| TTGTTAACA | 938280 | - |

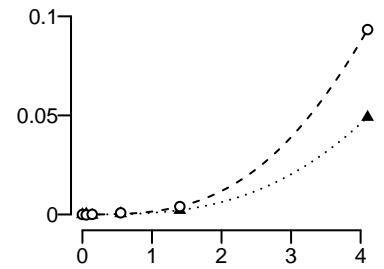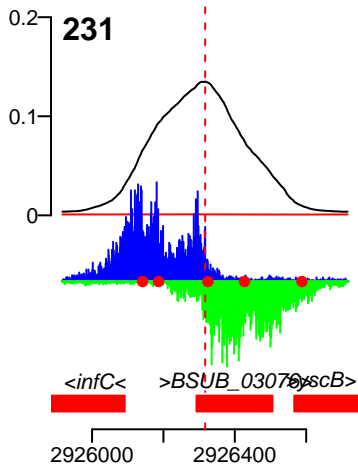

|            |         |   |
|------------|---------|---|
| TGATTCACA  | 2926142 | + |
| ATGCCACACA | 2926187 | - |
| TTCTACACA  | 2926325 | + |
| TCATCCCA   | 2926428 | + |
| TTTTTCACA  | 2926588 | + |

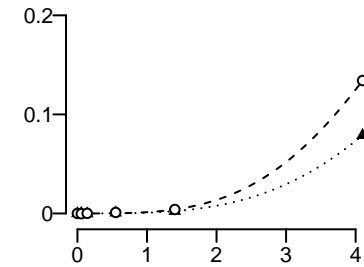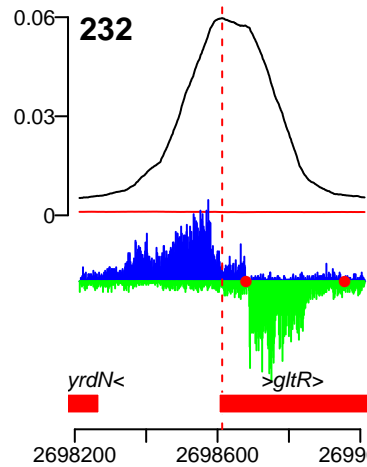

|           |         |   |
|-----------|---------|---|
| TTATGCACA | 2698680 | + |
| AAATCAACA | 2698956 | - |

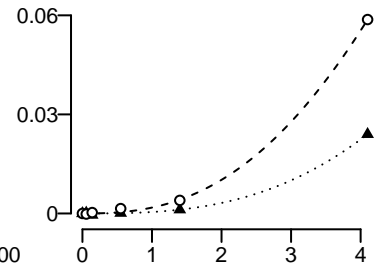

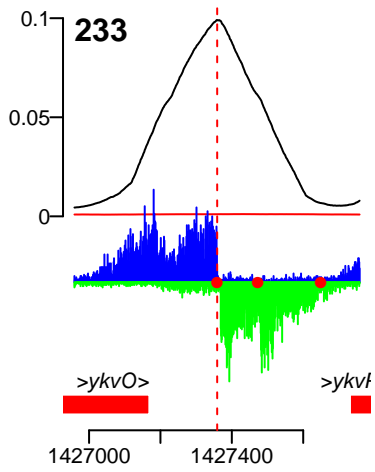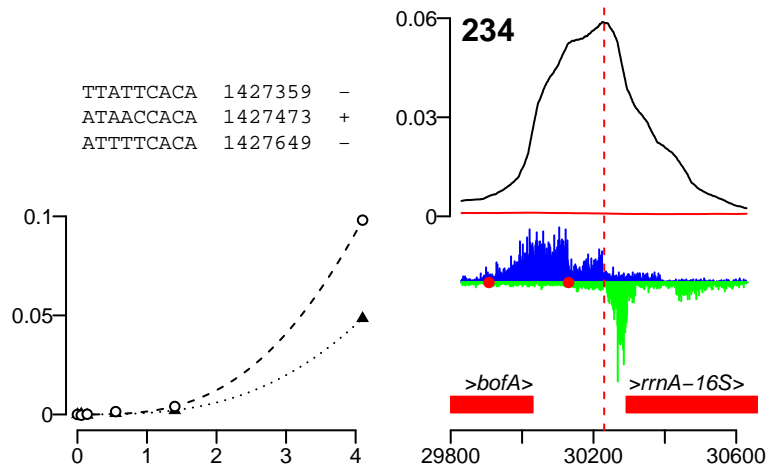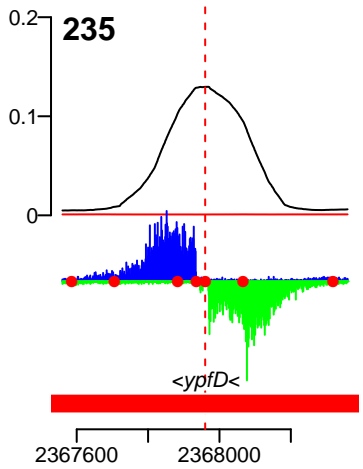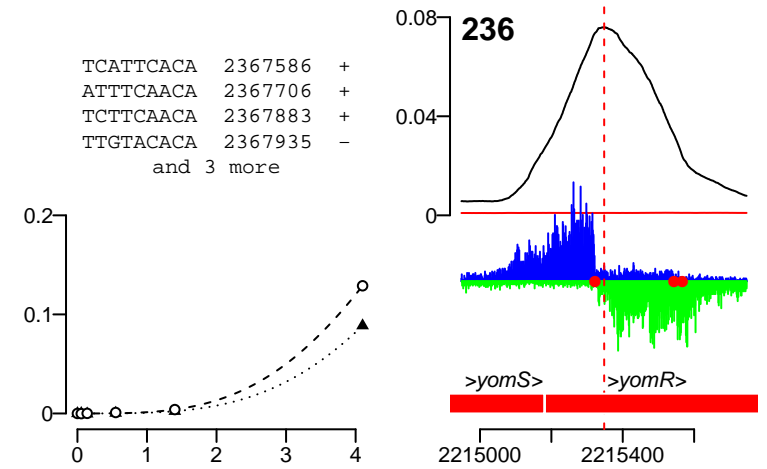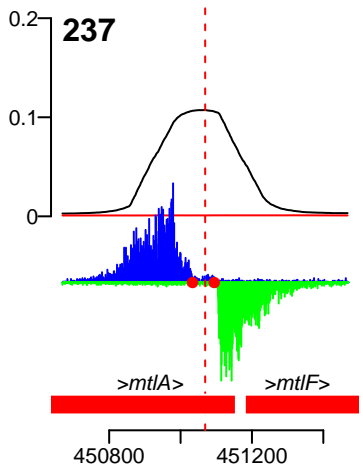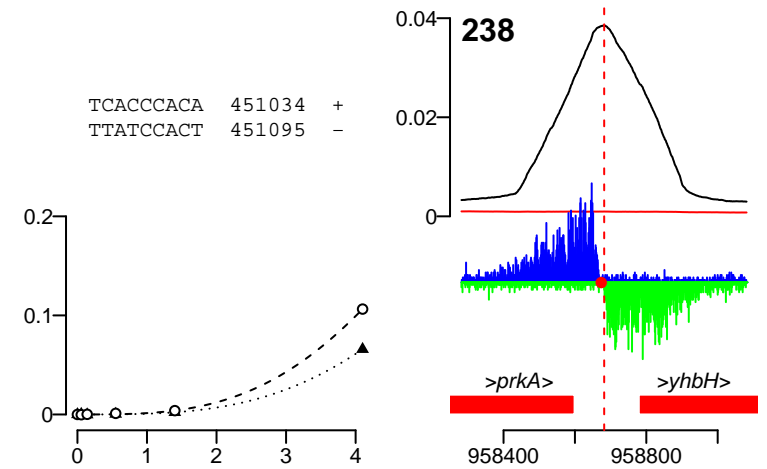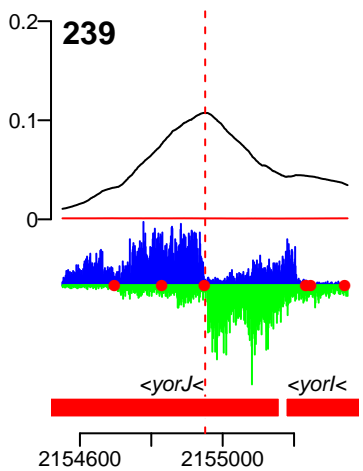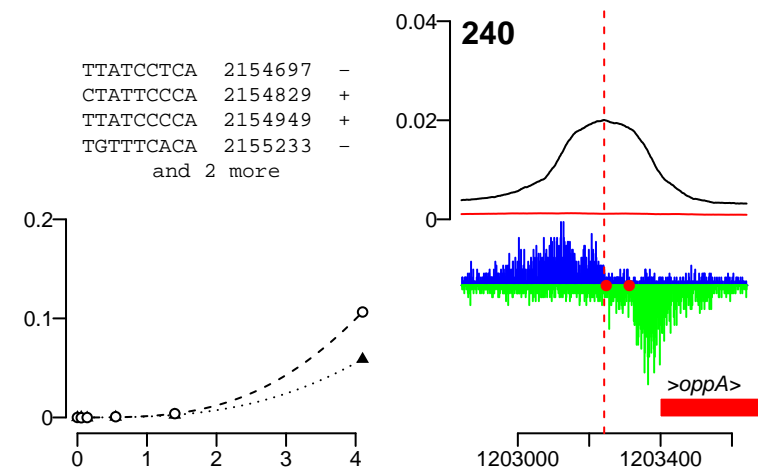

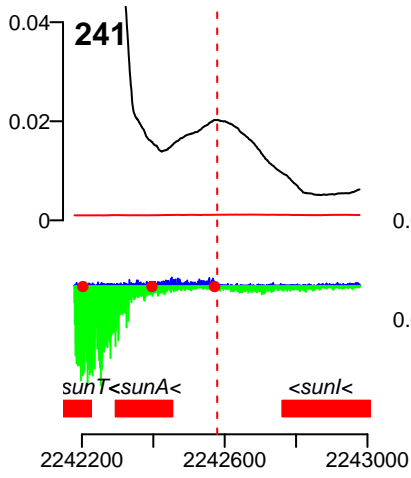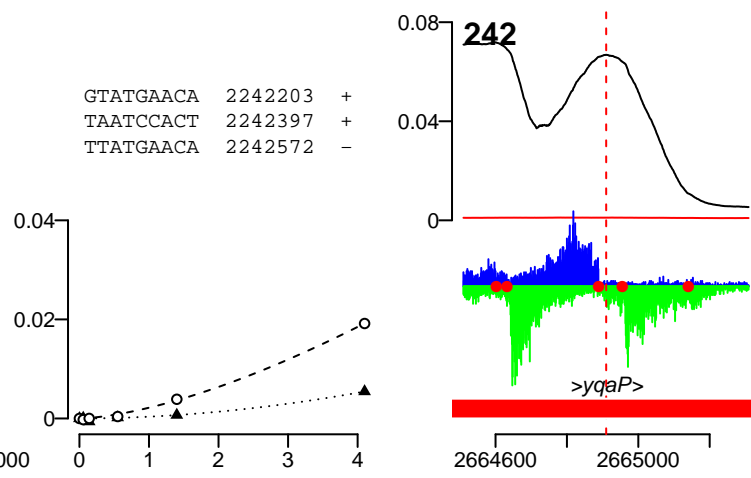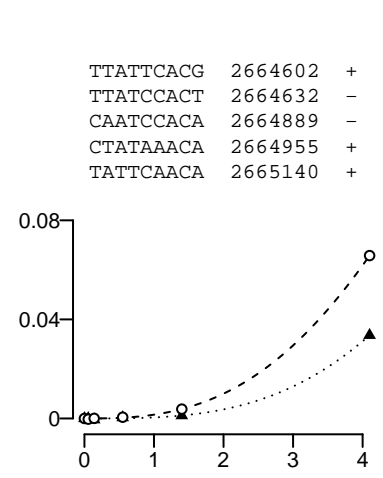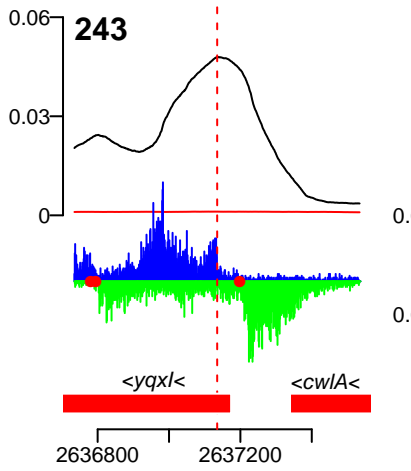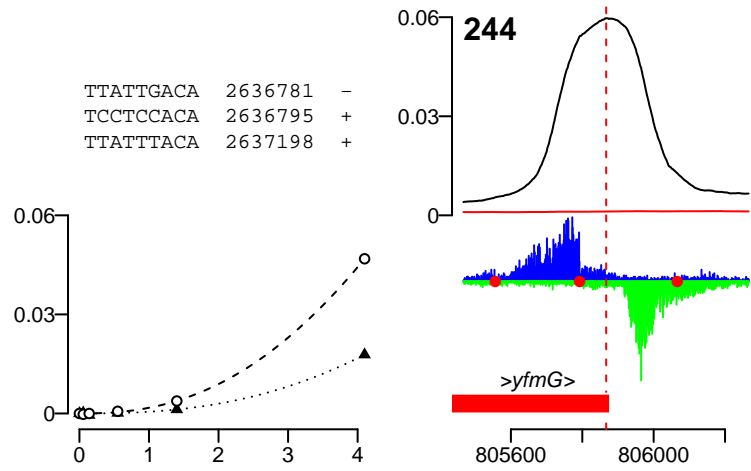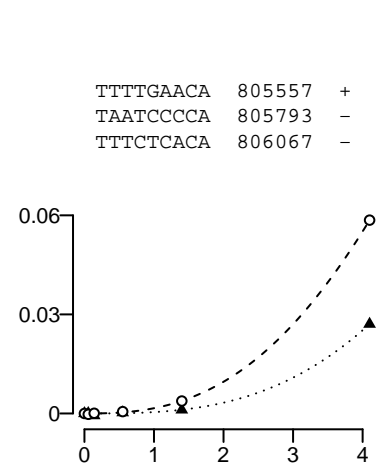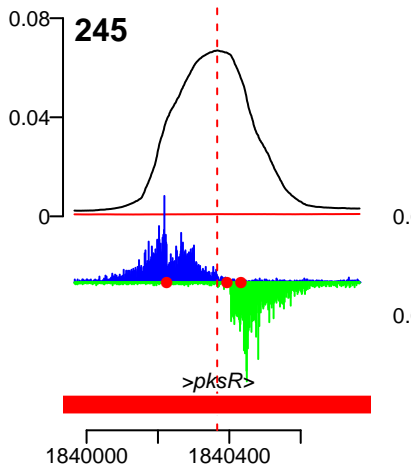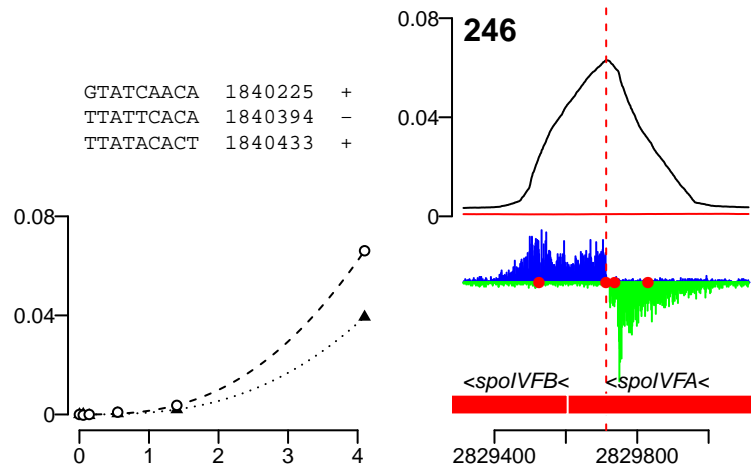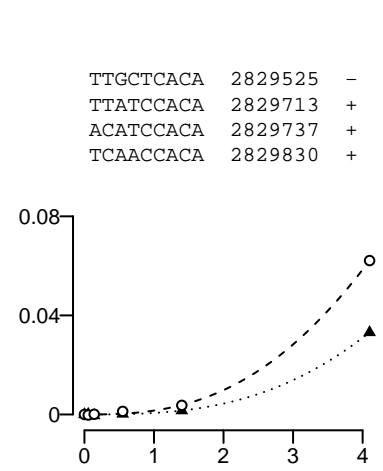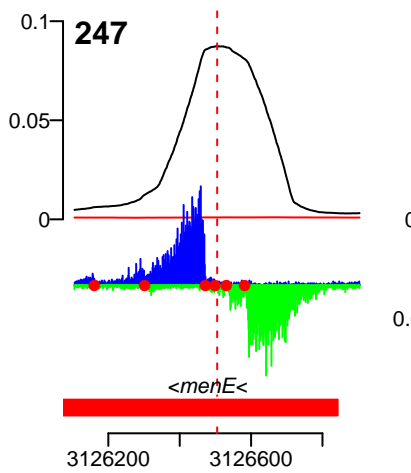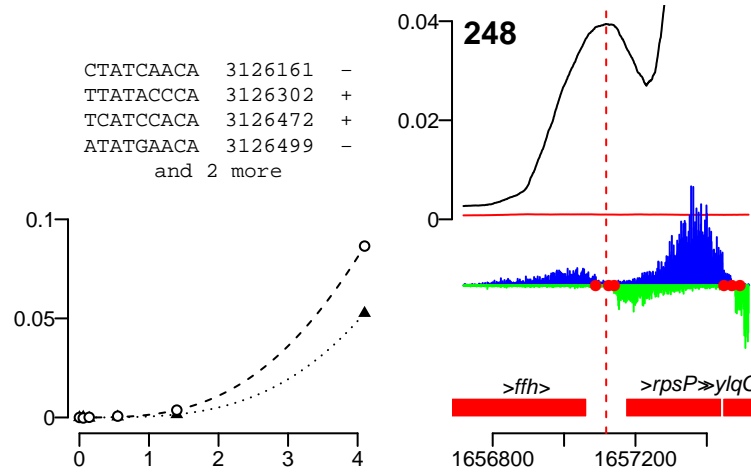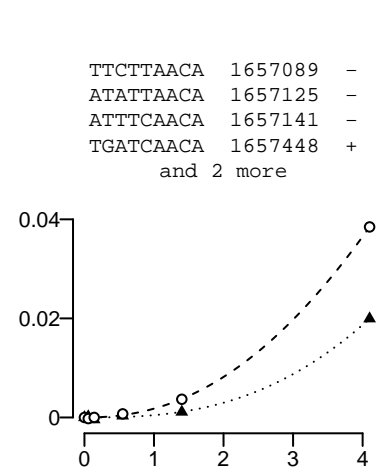

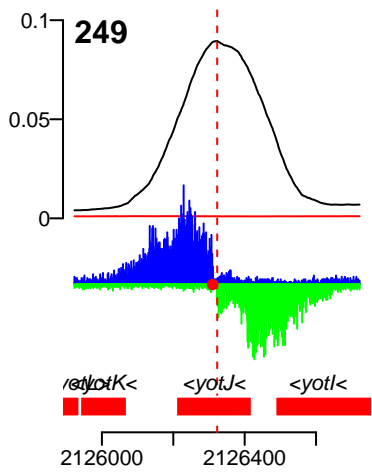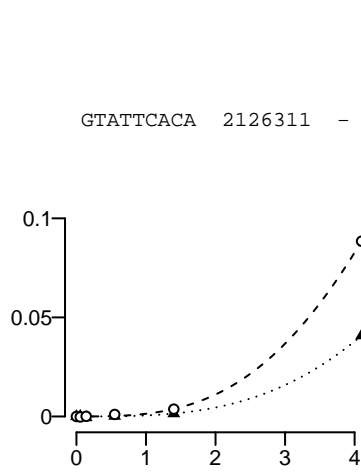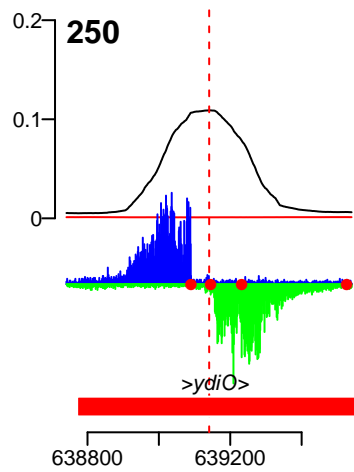

TTATCCCCA 639090 -  
TCGTACACA 639145 -  
TCTTCAACA 639232 -  
TGTTTCACA 639526 +

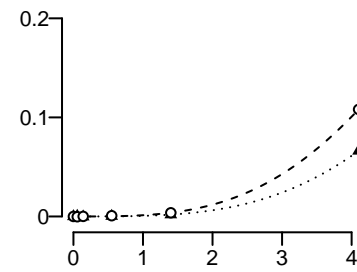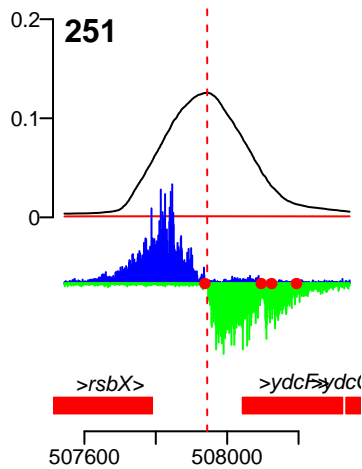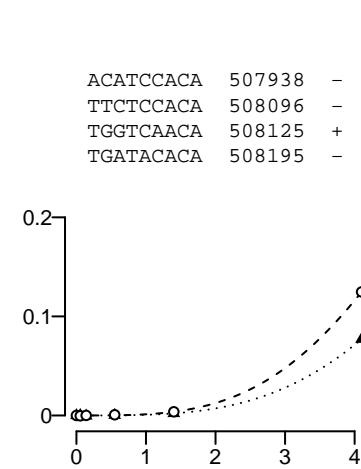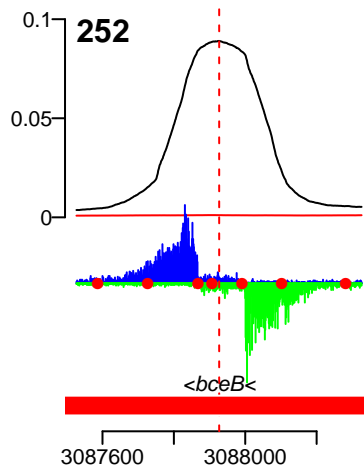

TCTTCCACA 3087587 -  
TTTAAACA 3087727 -  
TTTTCAACA 3087868 -  
TGTTTCACA 3087907 +  
and 3 more

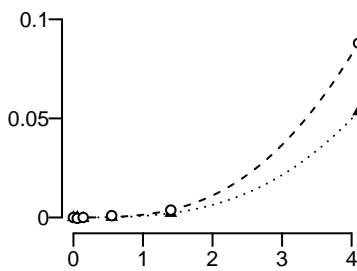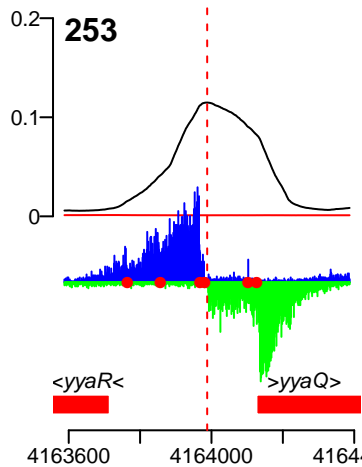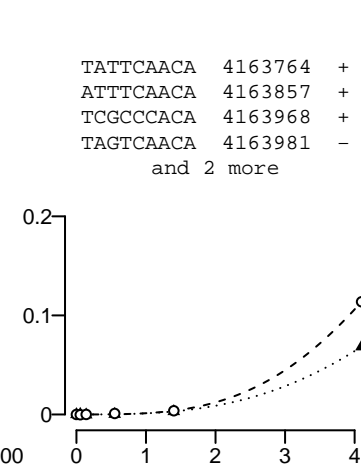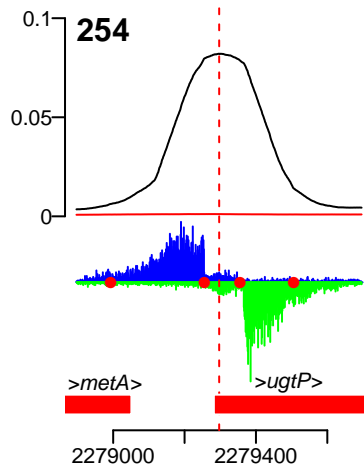

TCATAAACA 2278993 -  
TAATCAACA 2279256 -  
TTATGAACA 2279356 +  
TTGTCAACT 2279506 -

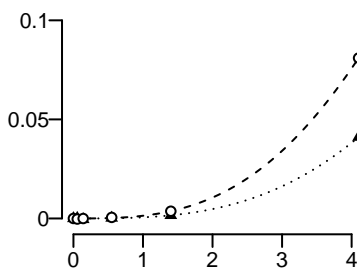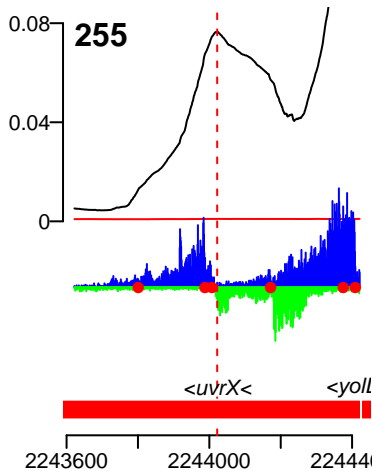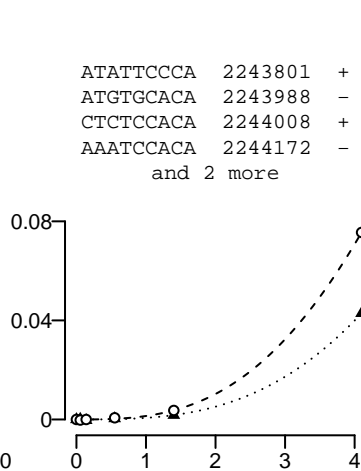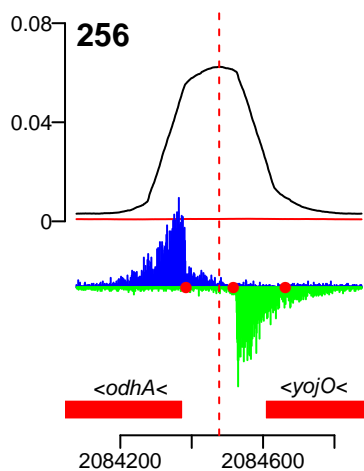

TTACCCCCA 2084384 +  
TTGTTCACA 2084517 +  
TGATCAACA 2084663 +

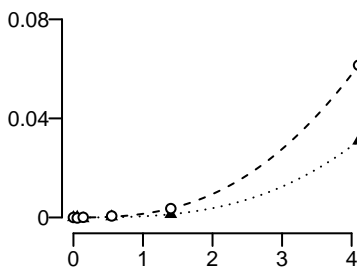



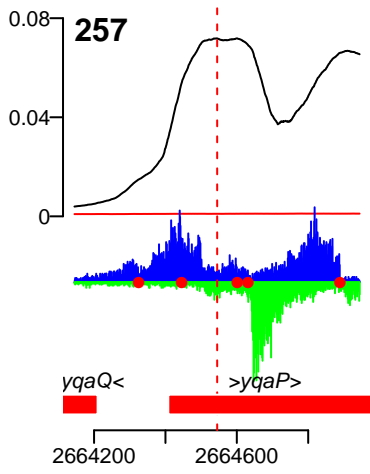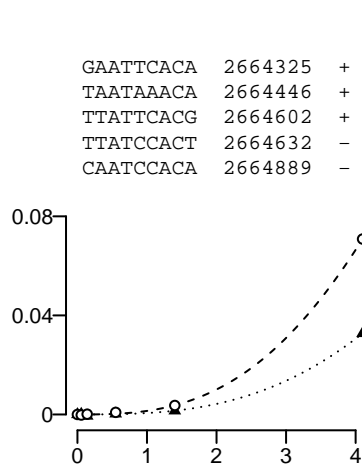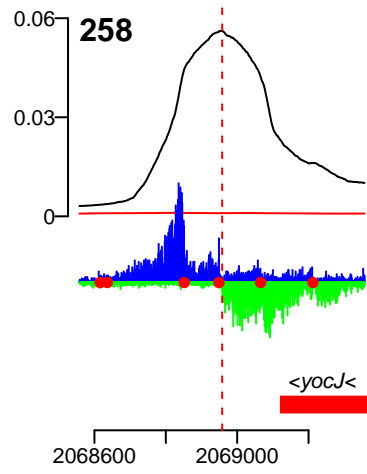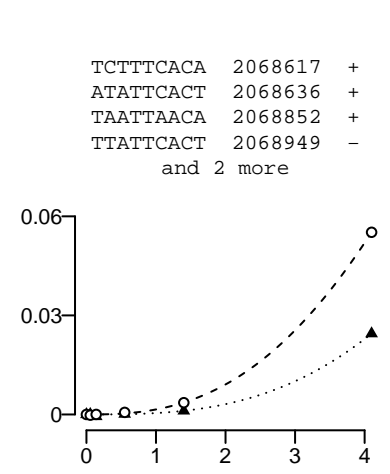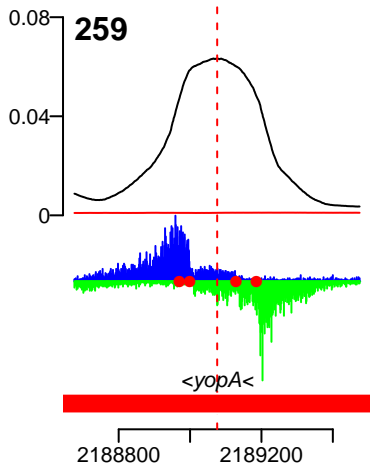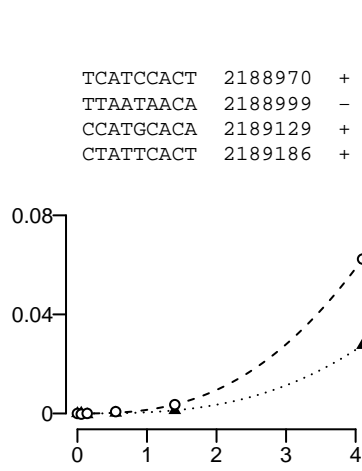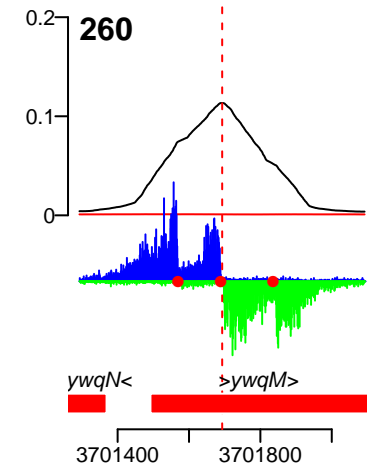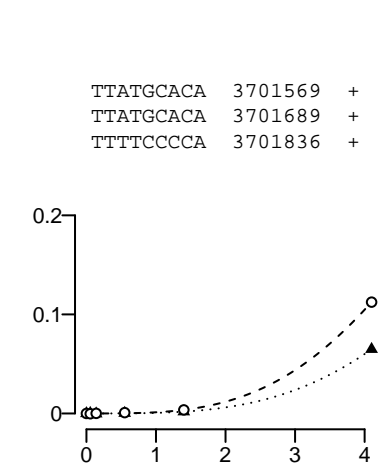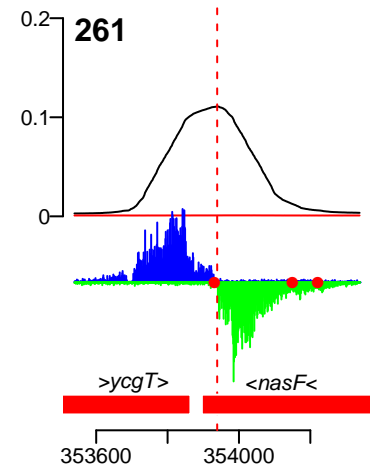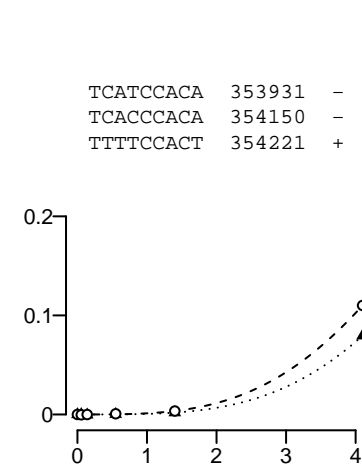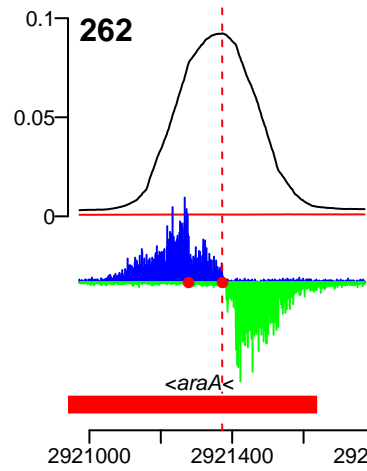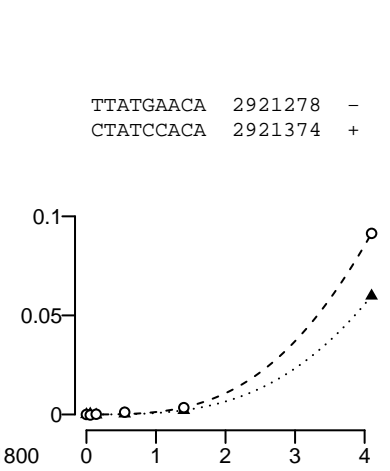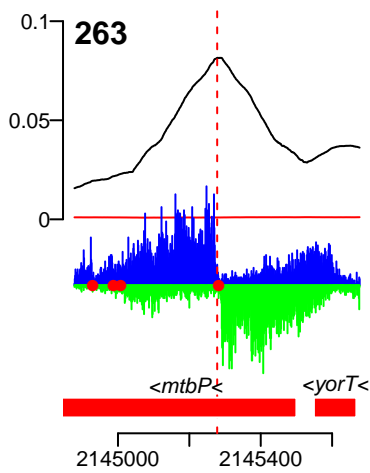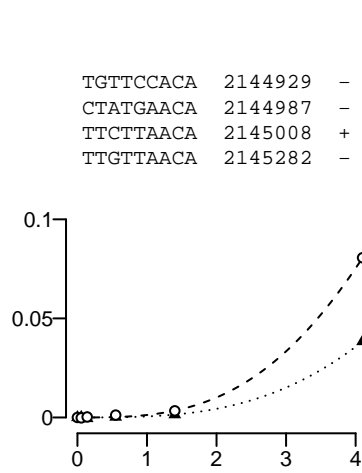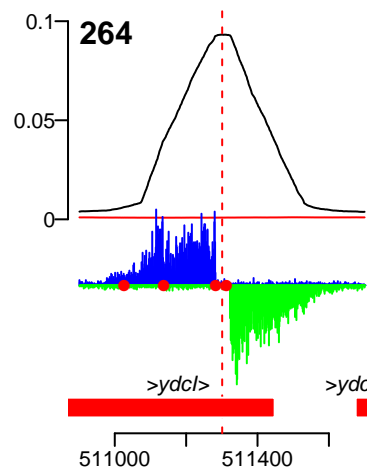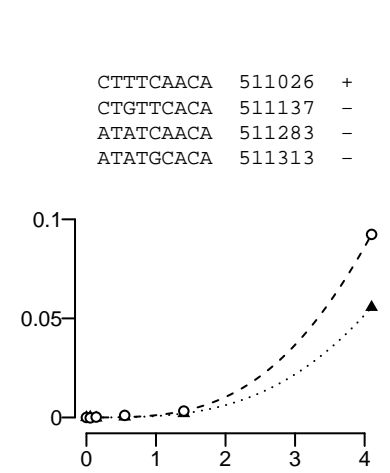

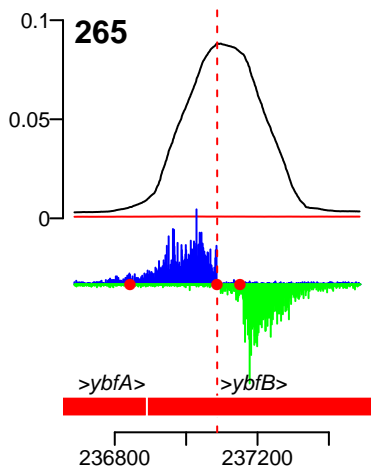

|           |        |   |
|-----------|--------|---|
| CTGTCCCA  | 236843 | - |
| TTGTCCACA | 237087 | - |
| TTCTTAACA | 237151 | + |

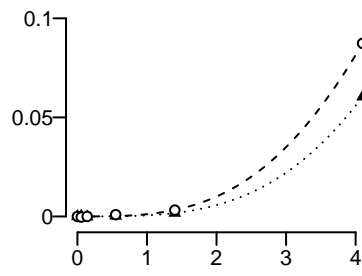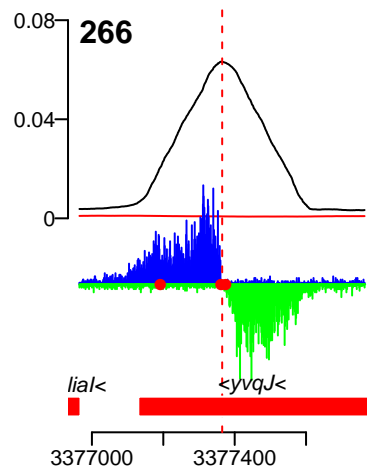

|           |         |   |
|-----------|---------|---|
| TTGTAAACA | 3377192 | + |
| CTATCCACA | 3377362 | + |
| TTATCCAGA | 3377375 | - |

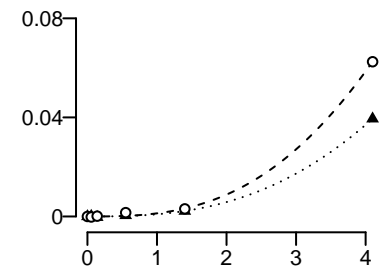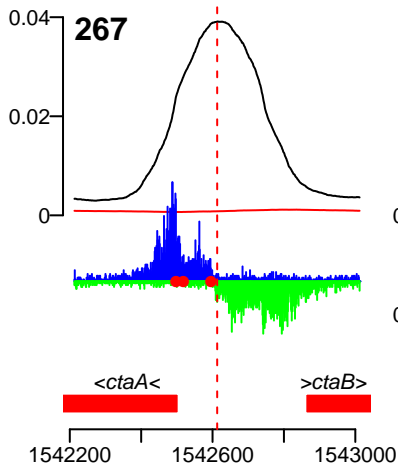

|           |         |   |
|-----------|---------|---|
| TTATTCATA | 1542498 | + |
| TTCTTAACA | 1542518 | + |
| TTGTTCACA | 1542596 | + |

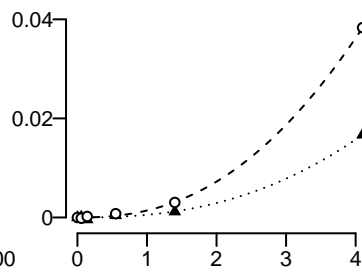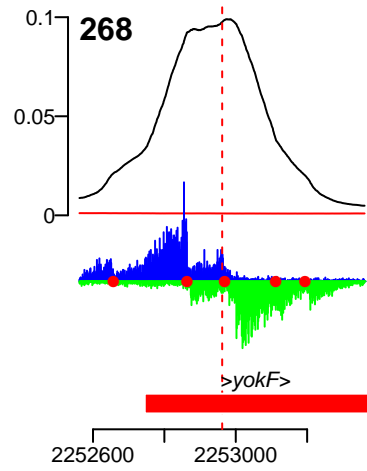

|           |         |   |
|-----------|---------|---|
| TAATTCACA | 2252657 | + |
| TTTCCACA  | 2252864 | - |
| CCATCAACA | 2252969 | - |
| TGGTCAACA | 2253112 | + |
| CCATCCACA | 2253194 | - |

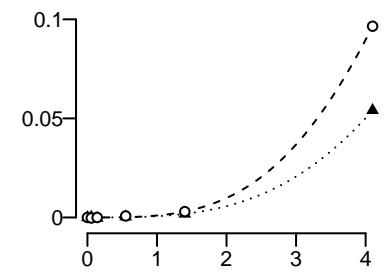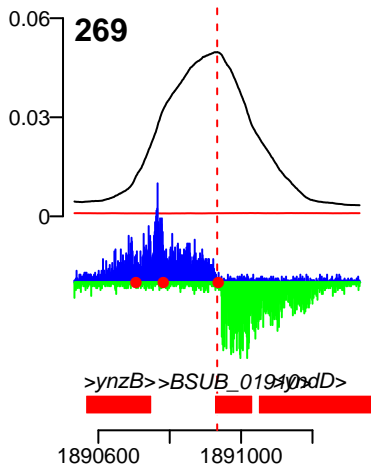

|           |         |   |
|-----------|---------|---|
| ACTTCCACA | 1890706 | - |
| TAATTAACA | 1890782 | - |
| ATATCAACA | 1890936 | + |

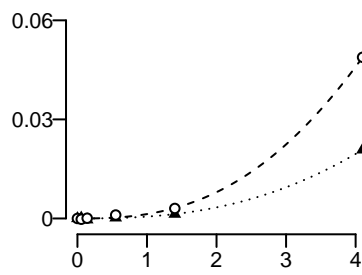

Supplement: pgen.1005258.s001.pdf [file pgen.1005258.s001.pdf]
