# Supplementary material for: In Vitro Whole Genome DNA Binding Analysis of the Bacterial Replication Initiator and Transcription Factor DnaA
Source: PubMed Central journal article supplement (PMC4447404; doi:10.1371/journal.pgen.1005258), 2015-05-28
Supplement: pgen.1005258.s008.pdf [file pgen.1005258.s008.pdf]

**Table S2. DnaA boxes used to determine the PSSM.**

| 5'      | 3'      | +/- | sequence   |
|---------|---------|-----|------------|
| 1006105 | 1006113 | +   | TTGTGAACA  |
| 1006129 | 1006137 | -   | TGGTCCACT  |
| 1012441 | 1012449 | +   | TTATACACG  |
| 1012588 | 1012596 | +   | TTATTCACT  |
| 1014428 | 1014436 | +   | TTATGCAGA  |
| 1014544 | 1014552 | -   | TGATTCACA  |
| 1014952 | 1014960 | +   | TTTTGTGCA  |
| 1015050 | 1015058 | +   | GTGTACACA  |
| 1016150 | 1016158 | -   | TTATTAACA  |
| 1016185 | 1016193 | +   | TCTTCCACA  |
| 1016326 | 1016334 | +   | TTATTCACA  |
| 1022553 | 1022561 | +   | TTATTCACA  |
| 1040122 | 1040130 | +   | CTATCAACA  |
| 1040211 | 1040219 | +   | CTATACACA  |
| 1070690 | 1070698 | +   | ATATTCACA  |
| 1070872 | 1070880 | +   | TTATACACA  |
| 1081420 | 1081428 | +   | GTATCAACA  |
| 1088429 | 1088437 | -   | TTATCAACA  |
| 1088569 | 1088577 | +   | TTATTAAGA  |
| 1088702 | 1088710 | -   | TTATCGACA  |
| 1088821 | 1088829 | +   | TCTTCCACA  |
| 1096308 | 1096316 | -   | TCGTCCACA  |
| 1096404 | 1096412 | -   | AAATCAACA  |
| 1096424 | 1096432 | +   | TTGTTCACA  |
| 1096790 | 1096798 | +   | TTGTCCACA  |
| 1104517 | 1104525 | -   | CAATTCACA  |
| 1104614 | 1104622 | -   | TTATTAACA  |
| 1109808 | 1109816 | -   | ATATCAACA  |
| 1109816 | 1109824 | -   | TTATCCATA  |
| 1111165 | 1111173 | +   | CTATCCCCA  |
| 1111250 | 1111258 | -   | TTATCCCCA  |
| 1111821 | 1111829 | -   | TTATCCACG  |
| 1111853 | 1111861 | +   | TTAATAACA  |
| 1112642 | 1112650 | -   | TAACCCACA  |
| 1112824 | 1112832 | -   | TTATCTACA  |
| 1113232 | 1113240 | +   | ATGTCAACA  |
| 1116247 | 1116255 | -   | ATATGCACA  |
| 1116422 | 1116430 | +   | ATATCCACA  |
| 1121963 | 1121971 | -   | TTGTTAACA  |
| 1122015 | 1122023 | -   | TTATTCACA  |
| 1139967 | 1139975 | -   | GTATCCACA  |
| 1140009 | 1140017 | -   | TTTTCAACA  |
| 1140076 | 1140084 | -   | ATGTACACA  |
| 1142254 | 1142262 | -   | TATTCACACA |
| 1142122 | 1142130 | -   | TTATCCACA  |
| 1154518 | 1154526 | -   | ATATCCCCA  |
| 1155386 | 1155394 | +   | GTGTACACA  |
| 1155488 | 1155496 | -   | TTATCCACT  |
| 1164978 | 1164986 | -   | TAATCAACA  |
| 1165048 | 1165056 | -   | TTGTTAACA  |
| 1165202 | 1165210 | -   | ATATCCTCA  |
| 1166036 | 1166044 | +   | CGATCCACA  |
| 1166144 | 1166152 | +   | GTATCAACA  |
| 1166154 | 1166162 | -   | TTGTCAACA  |
| 1166261 | 1166269 | +   | TCATCCACT  |
| 1175748 | 1175756 | +   | TTATTAACA  |
| 1175701 | 1175709 | -   | TTTTTAACA  |
| 1190177 | 1190185 | +   | TTGATCACA  |
| 1190228 | 1190236 | -   | TTGTCCACA  |
| 1190353 | 1190361 | -   | ACGTCCACA  |
| 1198413 | 1198421 | +   | TTATCCACA  |
| 1200206 | 1200214 | -   | TGATCAACA  |
| 1200240 | 1200248 | -   | TTGTCCACA  |
| 1200695 | 1200703 | +   | ATATCACCA  |
| 1200837 | 1200845 | -   | TTGTCCACA  |
| 1200893 | 1200901 | -   | TGACCCACA  |
| 1211254 | 1211262 | +   | CTATACACA  |
| 1212525 | 1212533 | -   | CCGTCCACA  |
| 1214737 | 1214745 | +   | ATATTCACA  |
| 1214885 | 1214893 | -   | ATATCCTCA  |
| 1218389 | 1218397 | +   | GTATCAACA  |
| 1218456 | 1218464 | -   | TAGTCAACA  |
| 1225637 | 1225645 | -   | CTGTCCACA  |
| 1225771 | 1225779 | -   | ATATTAACA  |
| 1226767 | 1226775 | +   | TTATTCACA  |
| 1226954 | 1226962 | +   | ATTTCCACA  |
| 1227479 | 1227487 | +   | CTATGCACA  |
| 1227537 | 1227545 | -   | ATATCCACA  |
| 1233829 | 1233837 | +   | TCATCCACA  |
| 1233858 | 1233866 | -   | TTCTCCACA  |
| 1233994 | 1234002 | +   | TTTTCCACT  |
| 1235164 | 1235172 | -   | CTTTTCACA  |
| 1235283 | 1235291 | -   | TTATCAACA  |
| 1236886 | 1236894 | -   | GAATGCACA  |
| 1236932 | 1236940 | -   | TTATCCATA  |
| 1237052 | 1237060 | -   | TTAATCACA  |
| 1248015 | 1248023 | -   | CAATCAACA  |
| 1248094 | 1248102 | +   | TTTTCAACA  |
| 1248208 | 1248216 | +   | TTGTCCACT  |
| 1252064 | 1252072 | +   | AAAAACACA  |
| 1252128 | 1252136 | -   | TCATTCACA  |
| 1252186 | 1252194 | -   | TTAGTCACA  |
| 1253817 | 1253825 | -   | CTATTAACA  |
| 1253706 | 1253714 | -   | TTATTAACA  |

| 5'      | 3'      | +/- | sequence  |
|---------|---------|-----|-----------|
| 1259479 | 1259487 | -   | TTGTCCACA |
| 1259554 | 1259562 | -   | TTATGAACA |
| 1275031 | 1275039 | -   | CGCTCCACA |
| 1275071 | 1275079 | -   | TTATCCCCA |
| 1281791 | 1281799 | -   | TTATTGACA |
| 1282049 | 1282057 | -   | TCATGCACA |
| 1293398 | 1293406 | -   | TTATGCACA |
| 1293448 | 1293456 | -   | TCGTACACA |
| 1293935 | 1293943 | -   | CAGTTCACA |
| 1293985 | 1293993 | +   | TTATGCACA |
| 1294015 | 1294023 | +   | ATTTACACA |
| 1304924 | 1304932 | -   | TTATCAACT |
| 1304958 | 1304966 | -   | TTTTCCCCA |
| 1305042 | 1305050 | -   | TTATTAACG |
| 1316949 | 1316957 | +   | TTATTCACA |
| 1317074 | 1317082 | -   | TTATTCACA |
| 1320714 | 1320722 | +   | TAATACACA |
| 1320735 | 1320743 | +   | TTACTCACC |
| 1321378 | 1321386 | -   | TTGCTCACA |
| 1321465 | 1321473 | -   | GTAATCACA |
| 1321477 | 1321485 | -   | TTGTCAACA |
| 1326884 | 1326892 | +   | CTGCCACA  |
| 1326948 | 1326956 | -   | TTATCCACA |
| 1327388 | 1327396 | +   | TTGTAAACA |
| 1327496 | 1327504 | -   | CAATCCACA |
| 1342829 | 1342837 | +   | TTATCCATC |
| 1342949 | 1342957 | -   | TTTTTCACA |
| 1343063 | 1343071 | -   | GTTTCAACA |
| 1369447 | 1369455 | -   | TTAATAACA |

| 5'      | 3'      | +/- | sequence  |
|---------|---------|-----|-----------|
| 1369478 | 1369486 | -   | TTACCAACA |
| 1369509 | 1369517 | +   | TTGTCAACA |
| 1382276 | 1382284 | +   | TTATTGACA |
| 1382343 | 1382351 | +   | TTACGCACA |
| 1382480 | 1382488 | +   | GCATACACA |
| 1392493 | 1392501 | -   | TCGTCCACA |
| 1392577 | 1392585 | +   | TGAATAACA |
| 1414148 | 1414156 | -   | TTGTAAACA |
| 1414176 | 1414184 | -   | TTGTGCATT |
| 1424617 | 1424625 | -   | TTGTGCACA |
| 1424731 | 1424739 | -   | TTATCAACA |
| 1427359 | 1427367 | -   | TTATTCACA |
| 1427984 | 1427992 | -   | TTTTACACA |
| 1428006 | 1428014 | -   | TTAATCCCC |
| 1429148 | 1429156 | -   | TTCCCACA  |
| 1429168 | 1429176 | -   | TCATCCCCA |
| 1429338 | 1429346 | -   | TTAATCACA |
| 1430349 | 1430357 | +   | TCATACACA |
| 1430529 | 1430537 | -   | TTATCAACA |
| 1431195 | 1431203 | -   | ATTTCCACA |
| 1431334 | 1431342 | +   | TTTTCAACA |
| 1431391 | 1431399 | +   | ATTTTCACA |
| 1439870 | 1439878 | -   | TCATCAACA |
| 1439950 | 1439958 | +   | ATATTCACA |
| 1446614 | 1446622 | +   | TTATCAACA |
| 1446692 | 1446700 | +   | ATATCCACT |
| 1449177 | 1449185 | -   | AAATCCCCA |
