# Supplementary material for: In Vitro Whole Genome DNA Binding Analysis of the Bacterial Replication Initiator and Transcription Factor DnaA
Source: PubMed Central journal article supplement (PMC4447404; doi:10.1371/journal.pgen.1005258), 2015-05-28
Supplement: pgen.1005258.s009.pdf [file pgen.1005258.s009.pdf]

**Table S3. Nucleotide frequencies for the DnaA box PSSM.**

| position | A   | C   | G  | T   |
|----------|-----|-----|----|-----|
| 1        | 23  | 16  | 10 | 101 |
| 2        | 13  | 15  | 7  | 115 |
| 3        | 96  | 3   | 33 | 18  |
| 4        | 8   | 9   | 1  | 132 |
| 5        | 16  | 78  | 13 | 43  |
| 6        | 45  | 100 | 3  | 2   |
| 7        | 138 | 9   | 1  | 2   |
| 8        | 0   | 144 | 2  | 4   |
| 9        | 135 | 3   | 3  | 9   |
