# Supplementary material for: In Vitro Whole Genome DNA Binding Analysis of the Bacterial Replication Initiator and Transcription Factor DnaA
Source: PubMed Central journal article supplement (PMC4447404; doi:10.1371/journal.pgen.1005258), 2015-05-28
Supplement: pgen.1005258.s010.pdf [file pgen.1005258.s010.pdf]

| peak | sequence  | p_value | start   | strand | bp to peak |
|------|-----------|---------|---------|--------|------------|
| 1    | TTGTCAACT | 1.0E-03 | 4193493 | +      | -297       |
| 1    | GTATCCACA | 7.7E-05 | 21      | +      | -129       |
| 1    | TTATCGACA | 3.9E-04 | 34      | +      | -116       |
| 1    | ATTTTCACA | 5.7E-04 | 45      | +      | -105       |
| 1    | TTGTCCACA | 9.3E-06 | 65      | -      | -85        |
| 1    | TTTTCAACA | 1.7E-04 | 78      | +      | -72        |
| 1    | TTATCCACA | 5.3E-06 | 99      | -      | -51        |
| 1    | TTATCCACA | 5.3E-06 | 193     | +      | 43         |
| 1    | TTATCCACA | 5.3E-06 | 205     | -      | 55         |
| 1    | CAATCCACA | 4.6E-04 | 216     | -      | 66         |
| 1    | TTCTACACA | 1.4E-03 | 238     | -      | 88         |
| 1    | TTGTCCACA | 9.3E-06 | 249     | +      | 99         |
| 1    | TTTTCGACA | 1.5E-03 | 270     | -      | 120        |
| 1    | TTTTCAACA | 1.7E-04 | 303     | +      | 153        |
| 1    | TCGTACACA | 8.7E-04 | 317     | -      | 167        |
| 2    | TTATTCACA | 1.6E-05 | 1777    | -      | -60        |
| 2    | TCATACACA | 4.3E-04 | 1797    | +      | -40        |
| 2    | CTGTCCACA | 1.1E-04 | 1808    | +      | -29        |
| 2    | CTATCCACA | 3.2E-05 | 1817    | -      | -20        |
| 2    | TTTTTCACA | 1.3E-04 | 1841    | +      | 4          |
| 2    | TTATCCACA | 5.3E-06 | 1852    | +      | 15         |
| 2    | AAATCCACA | 4.3E-04 | 1860    | +      | 23         |
| 2    | CTTTCACA  | 8.1E-04 | 1968    | -      | 131        |
| 3    | CCATCCACA | 3.4E-04 | 3885315 | +      | -355       |
| 3    | CTTTCACA  | 8.1E-04 | 3885553 | -      | -117       |
| 3    | TTATACACA | 5.9E-05 | 3885605 | +      | -65        |
| 3    | TTAATCACA | 4.3E-04 | 3885638 | +      | -32        |
| 3    | ATATCCACA | 2.8E-05 | 3885651 | +      | -19        |
| 3    | ATGTCCACA | 9.3E-05 | 3885659 | +      | -11        |
| 3    | ATATTCCCA | 1.2E-03 | 3885697 | +      | 27         |
| 3    | ATATACACA | 2.9E-04 | 3885711 | +      | 41         |
| 3    | TTATTCACT | 4.3E-04 | 3885723 | +      | 53         |
| 3    | TTATACACA | 5.9E-05 | 3885731 | +      | 61         |
| 3    | TTATACACA | 5.9E-05 | 3885746 | -      | 76         |
| 3    | TTATACACA | 5.9E-05 | 3885763 | +      | 93         |
| 3    | TTATCCACA | 5.3E-06 | 3885932 | +      | 262        |
| 4    | TTATTAACA | 7.3E-05 | 627872  | +      | -79        |
| 4    | CAATTCACA | 1.0E-03 | 627883  | +      | -68        |
| 4    | TTATCCACA | 5.3E-06 | 627894  | +      | -57        |
| 4    | TACTCACA  | 2.9E-04 | 627907  | -      | -44        |
| 4    | TTATTAACA | 7.3E-05 | 627952  | -      | 1          |
| 4    | TTATCCACT | 1.7E-04 | 627961  | -      | 10         |
| 4    | CTATCCACA | 3.2E-05 | 627983  | -      | 32         |
| 4    | TTATACACA | 5.9E-05 | 627992  | -      | 41         |
| 4    | TTATCCACA | 5.3E-06 | 628035  | -      | 84         |
| 4    | CTATCCACA | 3.2E-05 | 628088  | -      | 137        |

| peak | sequence  | p_value | start   | strand | bp to peak |
|------|-----------|---------|---------|--------|------------|
| 5    | ATTTCCACA | 2.3E-04 | 4190897 | -      | -170       |
| 5    | TTATCCACA | 5.3E-06 | 4191023 | +      | -44        |
| 5    | TTATCCACA | 5.3E-06 | 4191063 | +      | -4         |
| 5    | TTATTCACA | 1.6E-05 | 4191072 | -      | 5          |
| 5    | TTATCAACA | 2.3E-05 | 4191110 | +      | 43         |
| 5    | TTATTCACG | 8.7E-04 | 4191326 | -      | 259        |
| 6    | TTGTCCACA | 9.3E-06 | 3771832 | -      | -269       |
| 6    | TGATCCACA | 1.3E-04 | 3771990 | -      | -111       |
| 6    | TTATCCACA | 5.3E-06 | 3772001 | -      | -100       |
| 6    | ACATCCACA | 2.6E-04 | 3772020 | +      | -81        |
| 6    | TTATTCACA | 1.6E-05 | 3772064 | +      | -37        |
| 6    | TTATCCACA | 5.3E-06 | 3772144 | +      | 43         |
| 6    | TTGTCCACA | 9.3E-06 | 3772156 | -      | 55         |
| 6    | TTATCCACT | 1.7E-04 | 3772177 | -      | 76         |
| 6    | TTATACACA | 5.9E-05 | 3772189 | -      | 88         |
| 6    | TTATCCAGA | 7.0E-04 | 3772205 | +      | 104        |
| 6    | CGATTCACA | 1.4E-03 | 3772250 | +      | 149        |
| 7    | TTTTTAACA | 4.3E-04 | 2619869 | +      | -178       |
| 7    | TTTTCGACA | 1.5E-03 | 2619917 | -      | -130       |
| 7    | TTATCCACA | 5.3E-06 | 2619995 | -      | -52        |
| 7    | TTACACACA | 7.0E-04 | 2620006 | +      | -41        |
| 7    | CTATCCACT | 8.1E-04 | 2620015 | +      | -32        |
| 7    | TTATAAACA | 2.0E-04 | 2620049 | +      | 2          |
| 7    | ATACTCACA | 1.1E-03 | 2620060 | +      | 13         |
| 7    | TTATCCACT | 1.7E-04 | 2620071 | +      | 24         |
| 7    | TTATCCACA | 5.3E-06 | 2620086 | -      | 39         |
| 8    | ATATTCACA | 9.3E-05 | 4112941 | +      | -67        |
| 8    | TCATCCCCA | 7.0E-04 | 4112952 | +      | -56        |
| 8    | TTATTCATA | 1.0E-03 | 4112974 | +      | -34        |
| 8    | TTGTCCACA | 9.3E-06 | 4112987 | +      | -21        |
| 8    | ATATCCACA | 2.8E-05 | 4112998 | -      | -10        |
| 8    | TAATTCACA | 2.1E-04 | 4113068 | +      | 60         |
| 8    | TTATCCACA | 5.3E-06 | 4113080 | -      | 72         |
| 8    | TTCTTCACA | 5.7E-04 | 4113170 | +      | 162        |
| 8    | TTATTCACA | 1.6E-05 | 4113261 | +      | 253        |
| 8    | TTATCCACA | 5.3E-06 | 4113295 | +      | 287        |
| 8    | TCATCAACA | 1.9E-04 | 4113319 | -      | 311        |
| 9    | TTCTTAACA | 1.5E-03 | 1670746 | -      | -64        |
| 9    | TTATTCACA | 1.6E-05 | 1670797 | +      | -13        |
| 9    | TAATTCACA | 2.1E-04 | 1670815 | -      | 5          |
| 9    | GAATCCACA | 7.0E-04 | 1670824 | -      | 14         |
| 10   | TTATCAACA | 2.3E-05 | 137705  | +      | -18        |
| 10   | TTATGCACA | 5.9E-05 | 137730  | -      | 7          |
| 10   | TTATCAACA | 2.3E-05 | 137915  | +      | 192        |
| 10   | TCACCCACA | 7.0E-04 | 137997  | +      | 274        |
| 11   | TTTTCAACA | 1.7E-04 | 1870544 | -      | -74        |

| peak | sequence  | p_value | start   | strand | bp to peak |
|------|-----------|---------|---------|--------|------------|
| 11   | TGATCAACA | 4.3E-04 | 1870594 | +      | -24        |
| 11   | TTATCCACA | 5.3E-06 | 1870624 | +      | 6          |
| 12   | ATATACACA | 2.9E-04 | 962393  | +      | -366       |
| 12   | TTATTCACA | 1.6E-05 | 962597  | +      | -162       |
| 12   | TTATAAACA | 2.0E-04 | 962732  | +      | -27        |
| 12   | TTATCCCCA | 1.3E-04 | 962764  | -      | 5          |
| 12   | TTGCCCACA | 2.6E-04 | 962785  | -      | 26         |
| 13   | TTTTCAACA | 1.7E-04 | 2158624 | +      | -211       |
| 13   | TTGTACACA | 1.5E-04 | 2158684 | +      | -151       |
| 13   | CTGTTTACA | 2.6E-04 | 2158819 | +      | -16        |
| 13   | ATATCCACA | 2.8E-05 | 2158843 | -      | 8          |
| 13   | TTATTCACA | 1.6E-05 | 2158867 | -      | 32         |
| 14   | TGATCCCCA | 1.4E-03 | 3582497 | +      | -377       |
| 14   | TTTTCCACA | 4.3E-05 | 3582862 | +      | -12        |
| 14   | ATATCAACA | 1.3E-04 | 3582899 | +      | 25         |
| 14   | TAATGAACA | 1.4E-03 | 3583087 | +      | 213        |
| 15   | GAATTCACA | 1.5E-03 | 972562  | +      | -185       |
| 15   | TTGACAACA | 1.0E-03 | 972742  | +      | -5         |
| 15   | TCATTAACA | 4.6E-04 | 972752  | -      | 5          |
| 15   | TTATTGACA | 8.1E-04 | 972764  | -      | 17         |
| 15   | ATTTACACA | 1.4E-03 | 973097  | +      | 350        |
| 16   | TTATCCTCA | 6.2E-04 | 3287219 | -      | -324       |
| 16   | TTTTGCACA | 3.9E-04 | 3287471 | -      | -72        |
| 16   | TTATTAACA | 7.3E-05 | 3287506 | +      | -37        |
| 16   | TTATACACA | 5.9E-05 | 3287546 | -      | 3          |
| 16   | CTGTCCACA | 1.1E-04 | 3287587 | -      | 44         |
| 16   | TTCTCCACA | 2.6E-04 | 3287633 | -      | 90         |
| 17   | TTATCCACA | 5.3E-06 | 4104254 | +      | -4         |
| 17   | TTGTCCTCA | 1.3E-03 | 4104282 | -      | 24         |
| 17   | ATATGAACA | 8.1E-04 | 4104326 | +      | 68         |
| 17   | TTTTGCACA | 3.9E-04 | 4104484 | +      | 226        |
| 18   | ATATCCCCA | 5.2E-04 | 3648229 | +      | -355       |
| 18   | TCATCAACA | 1.9E-04 | 3648548 | +      | -36        |
| 18   | AGATCAACA | 1.4E-03 | 3648572 | -      | -12        |
| 18   | TTATAAACA | 2.0E-04 | 3648590 | +      | 6          |
| 18   | CCATCAACA | 8.7E-04 | 3648690 | +      | 106        |
| 19   | TTATCCCCA | 1.3E-04 | 2184370 | +      | 3          |
| 19   | TTATCCACC | 3.9E-04 | 2184382 | +      | 15         |
| 20   | ATCTCCACA | 1.0E-03 | 722356  | -      | -137       |
| 20   | ATATCCACA | 2.8E-05 | 722467  | -      | -26        |
| 20   | TTATCAACA | 2.3E-05 | 722508  | -      | 15         |
| 20   | ATATCACCA | 1.4E-03 | 722776  | -      | 283        |
| 21   | ATTTTAACA | 1.5E-03 | 1874926 | -      | -319       |
| 21   | TAATCCACA | 8.2E-05 | 1874945 | +      | -300       |
| 21   | ATATCCACT | 7.0E-04 | 1875209 | +      | -36        |
| 21   | TCATCCACT | 9.6E-04 | 1875218 | +      | -27        |

| peak | sequence   | p_value | start   | strand | bp to peak |
|------|------------|---------|---------|--------|------------|
| 21   | GTATCAACA  | 2.3E-04 | 1875251 | +      | 6          |
| 21   | TTATGAACA  | 1.9E-04 | 1875297 | -      | 52         |
| 22   | TTATCCACA  | 5.3E-06 | 2901929 | +      | -45        |
| 22   | ATATCCACA  | 2.8E-05 | 2901980 | +      | 6          |
| 22   | AAATCAACA  | 1.1E-03 | 2902148 | +      | 174        |
| 23   | TTATCCAGA  | 7.0E-04 | 2254794 | +      | -45        |
| 23   | TTTTCCCCA  | 6.2E-04 | 2254843 | -      | 4          |
| 23   | TAATCAACA  | 2.6E-04 | 2254869 | +      | 30         |
| 23   | TTATAAACA  | 2.0E-04 | 2255018 | +      | 179        |
| 24   | TTTTTAACA  | 4.3E-04 | 1253432 | +      | -384       |
| 24   | TTATTTACA  | 1.3E-03 | 1253696 | -      | -120       |
| 24   | TTATTAACA  | 7.3E-05 | 1253706 | -      | -110       |
| 24   | TCG TTCACA | 3.4E-04 | 1253717 | -      | -99        |
| 24   | CTATTAACA  | 3.9E-04 | 1253817 | -      | 1          |
| 24   | ATTTCCACA  | 2.3E-04 | 1253858 | -      | 42         |
| 25   | GTGTCCACA  | 2.0E-04 | 2036985 | -      | -339       |
| 25   | AAATCCACA  | 4.3E-04 | 2037062 | -      | -262       |
| 25   | ATATCGACA  | 1.3E-03 | 2037266 | +      | -58        |
| 25   | T TACTCACA | 2.9E-04 | 2037299 | -      | -25        |
| 25   | ATATCAACA  | 1.3E-04 | 2037343 | -      | 19         |
| 25   | TTTTGAACA  | 9.6E-04 | 2037393 | -      | 69         |
| 25   | TTTTCAACA  | 1.7E-04 | 2037429 | +      | 105        |
| 25   | ATATCAACA  | 1.3E-04 | 2037662 | +      | 338        |
| 26   | AAATTCACA  | 9.6E-04 | 2241836 | -      | -255       |
| 26   | TTATCCCCA  | 1.3E-04 | 2242042 | +      | -49        |
| 26   | TTATCCCCA  | 1.3E-04 | 2242095 | +      | 4          |
| 26   | TAGTCCACA  | 2.1E-04 | 2242172 | +      | 81         |
| 26   | GTATGAACA  | 1.3E-03 | 2242203 | +      | 112        |
| 26   | TAATCCACT  | 1.3E-03 | 2242397 | +      | 306        |
| 27   | TTATCCACA  | 5.3E-06 | 2864210 | +      | -4         |
| 27   | TTATCTACA  | 6.2E-04 | 2864309 | +      | 95         |
| 27   | AAATCAACA  | 1.1E-03 | 2864495 | +      | 281        |
| 28   | TTATCCACA  | 5.3E-06 | 2657843 | +      | -49        |
| 28   | TTATTCACC  | 8.7E-04 | 2657897 | +      | 5          |
| 28   | TTATCTACA  | 6.2E-04 | 2658001 | +      | 109        |
| 28   | TTATTCATA  | 1.0E-03 | 2658022 | +      | 130        |
| 28   | TATTT CACA | 1.1E-03 | 2658040 | -      | 148        |
| 29   | ATG TTCACA | 2.3E-04 | 3766372 | +      | -14        |
| 29   | TCTTCCACA  | 3.4E-04 | 3766589 | +      | 203        |
| 29   | CCATTCACA  | 7.0E-04 | 3766659 | -      | 273        |
| 29   | TCTTCCACA  | 3.4E-04 | 3766724 | +      | 338        |
| 30   | TTCTTAACA  | 1.5E-03 | 3637019 | -      | -40        |
| 30   | TAATTCACA  | 2.1E-04 | 3637029 | -      | -30        |
| 30   | TTAACAACA  | 4.9E-04 | 3637056 | -      | -3         |
| 30   | TTAATAACA  | 1.1E-03 | 3637296 | +      | 237        |
| 31   | TTGCCAACA  | 8.1E-04 | 537404  | +      | -328       |

| peak | sequence  | p_value | start   | strand | bp to peak |
|------|-----------|---------|---------|--------|------------|
| 31   | TTTTGAACA | 9.6E-04 | 537523  | -      | -209       |
| 31   | TAATCCACA | 8.2E-05 | 537680  | -      | -52        |
| 31   | GTATCCCCA | 9.6E-04 | 537727  | -      | -5         |
| 31   | TCATACACA | 4.3E-04 | 537766  | +      | 34         |
| 31   | TTAACCACA | 1.9E-04 | 537790  | -      | 58         |
| 31   | ATATGAACA | 8.1E-04 | 537898  | -      | 166        |
| 31   | ATATGAACA | 8.1E-04 | 538021  | +      | 289        |
| 32   | TTATTCACA | 1.6E-05 | 3930964 | -      | -51        |
| 32   | ATGTCCACA | 9.3E-05 | 3931017 | -      | 2          |
| 32   | ATTTGCACA | 1.3E-03 | 3931039 | -      | 24         |
| 32   | TTTTTCACA | 1.3E-04 | 3931066 | +      | 51         |
| 32   | ATATGAACA | 8.1E-04 | 3931284 | +      | 269        |
| 33   | ATTTCAACA | 7.0E-04 | 3444517 | -      | -309       |
| 33   | ATACCAACA | 1.3E-03 | 3444749 | +      | -77        |
| 33   | ATATTCACT | 1.4E-03 | 3444779 | +      | -47        |
| 33   | TTATCAATA | 1.2E-03 | 3444801 | +      | -25        |
| 33   | TAGTTAACA | 1.3E-03 | 3444897 | +      | 71         |
| 34   | ATATCAACA | 1.3E-04 | 2230877 | -      | -257       |
| 34   | CTATTAACA | 3.9E-04 | 2230913 | -      | -221       |
| 34   | TTATTAACT | 1.0E-03 | 2230970 | -      | -164       |
| 34   | TGATCAACA | 4.3E-04 | 2231030 | +      | -104       |
| 34   | GCATCCACA | 4.9E-04 | 2231124 | +      | -10        |
| 34   | TAATTAACA | 6.2E-04 | 2231171 | -      | 37         |
| 34   | TTGACAACA | 1.0E-03 | 2231255 | -      | 121        |
| 34   | TTGTCCACT | 3.9E-04 | 2231344 | +      | 210        |
| 35   | TTATCCACT | 1.7E-04 | 4103024 | +      | -4         |
| 35   | TCATCAACA | 1.9E-04 | 4103115 | -      | 87         |
| 35   | TTATCCAGA | 7.0E-04 | 4103315 | +      | 287        |
| 36   | CCTTCCACA | 1.4E-03 | 2046802 | -      | -169       |
| 36   | TTTTTCACA | 1.3E-04 | 2046865 | -      | -106       |
| 36   | TTATGAACA | 1.9E-04 | 2046964 | +      | -7         |
| 36   | CTGTTCACA | 2.6E-04 | 2047036 | -      | 65         |
| 36   | ATATTCACT | 1.4E-03 | 2047066 | -      | 95         |
| 36   | TTTTCAACA | 1.7E-04 | 2047232 | -      | 261        |
| 37   | ACATTCACA | 6.2E-04 | 513202  | -      | -286       |
| 37   | ACATTCACA | 6.2E-04 | 513328  | -      | -160       |
| 37   | TTATGCACA | 5.9E-05 | 513487  | +      | -1         |
| 37   | TTTTAAACA | 1.0E-03 | 513590  | +      | 102        |
| 38   | TCAACCACA | 1.0E-03 | 1005752 | +      | -373       |
| 38   | TCGTCCCCA | 1.4E-03 | 1006090 | -      | -35        |
| 38   | TTGTTCACA | 4.3E-05 | 1006106 | -      | -19        |
| 38   | TTGTTCACT | 8.7E-04 | 1006159 | -      | 34         |
| 38   | ATTTCAACA | 7.0E-04 | 1006205 | +      | 80         |
| 39   | TTATTCACA | 1.6E-05 | 2001370 | +      | -10        |
| 39   | AAATTCACA | 9.6E-04 | 2001392 | +      | 12         |
| 39   | ATTTCAACA | 7.0E-04 | 2001590 | +      | 210        |

| peak | sequence  | p_value | start   | strand | bp to peak |
|------|-----------|---------|---------|--------|------------|
| 39   | TTACCCCCA | 1.3E-03 | 2001749 | +      | 369        |
| 40   | GTTTCCACA | 4.6E-04 | 624755  | -      | -14        |
| 40   | TTATCCACA | 5.3E-06 | 624772  | +      | 3          |
| 40   | CTTTCAACA | 8.1E-04 | 624920  | -      | 151        |
| 41   | ACATACACA | 1.5E-03 | 2143834 | -      | -343       |
| 41   | ATATTCACT | 1.4E-03 | 2143903 | +      | -274       |
| 41   | TTTTAAACA | 1.0E-03 | 2144152 | -      | -25        |
| 41   | TTATTCAGA | 1.4E-03 | 2144169 | +      | -8         |
| 41   | TTATTAACA | 7.3E-05 | 2144182 | +      | 5          |
| 42   | TTGTTAACA | 1.7E-04 | 3360149 | -      | -1         |
| 42   | ATGTCCACA | 9.3E-05 | 3360180 | +      | 30         |
| 43   | TAATCCACA | 8.2E-05 | 3282009 | -      | -32        |
| 43   | TTCTTCACA | 5.7E-04 | 3282024 | -      | -17        |
| 43   | TTATCCCCA | 1.3E-04 | 3282045 | -      | 4          |
| 44   | ATGTCCCCA | 1.1E-03 | 4185782 | -      | -41        |
| 44   | TTATCCACA | 5.3E-06 | 4185822 | +      | -1         |
| 44   | ATATTCACT | 1.4E-03 | 4185860 | +      | 37         |
| 44   | TTTTTAACA | 4.3E-04 | 4185889 | -      | 66         |
| 45   | TTATCCACA | 5.3E-06 | 3887119 | -      | -37        |
| 45   | TTATACACA | 5.9E-05 | 3887167 | -      | 11         |
| 46   | TTTTAAACA | 1.0E-03 | 2687164 | -      | -199       |
| 46   | ATAATCACA | 1.5E-03 | 2687307 | +      | -56        |
| 46   | TTATTAACT | 1.0E-03 | 2687366 | +      | 3          |
| 46   | TTATTCACA | 1.6E-05 | 2687381 | +      | 18         |
| 47   | TTGTCACCA | 8.1E-04 | 2036861 | +      | -41        |
| 47   | ATGTGCACA | 6.2E-04 | 2036878 | -      | -24        |
| 47   | CTCTCCACA | 1.1E-03 | 2036898 | +      | -4         |
| 47   | GTGTCCACA | 2.0E-04 | 2036985 | -      | 83         |
| 47   | AAATCCACA | 4.3E-04 | 2037062 | -      | 160        |
| 47   | ATATCGACA | 1.3E-03 | 2037266 | +      | 364        |
| 48   | ATATTCCCA | 1.2E-03 | 730696  | +      | -234       |
| 48   | TTATTCACA | 1.6E-05 | 730928  | -      | -2         |
| 49   | TTTTGAACA | 9.6E-04 | 1098545 | +      | -210       |
| 49   | AAATCCACA | 4.3E-04 | 1098702 | -      | -53        |
| 49   | TTTTGAACA | 9.6E-04 | 1098710 | +      | -45        |
| 49   | CCATTCACA | 7.0E-04 | 1098760 | +      | 5          |
| 49   | TCATCCACA | 5.9E-05 | 1098782 | +      | 27         |
| 49   | TAATCAACA | 2.6E-04 | 1099121 | -      | 366        |
| 50   | GTATCAACA | 2.3E-04 | 1535900 | -      | -358       |
| 50   | TTATACACA | 5.9E-05 | 1536188 | +      | -70        |
| 50   | TTATTAACA | 7.3E-05 | 1536261 | +      | 3          |
| 50   | TTTTACACA | 3.9E-04 | 1536325 | +      | 67         |
| 50   | TTTTTAACA | 4.3E-04 | 1536451 | -      | 193        |
| 50   | TTATTCTCA | 1.4E-03 | 1536634 | +      | 376        |
| 51   | TAATTCACA | 2.1E-04 | 3107521 | +      | -79        |
| 51   | TTATTAACA | 7.3E-05 | 3107604 | +      | 4          |

| peak | sequence  | p_value | start   | strand | bp to peak |
|------|-----------|---------|---------|--------|------------|
| 51   | ACATCCACA | 2.6E-04 | 3107688 | +      | 88         |
| 52   | TAATCAACA | 2.6E-04 | 216184  | -      | -51        |
| 52   | TTGTCTACA | 1.3E-03 | 216294  | +      | 59         |
| 52   | TTATTAACA | 7.3E-05 | 216315  | +      | 80         |
| 53   | TCATTAACA | 4.6E-04 | 2760372 | -      | -263       |
| 53   | AAATTCACA | 9.6E-04 | 2760493 | +      | -142       |
| 53   | CTATTCACA | 1.1E-04 | 2760592 | +      | -43        |
| 53   | TTATCCACA | 5.3E-06 | 2760632 | +      | -3         |
| 53   | GTATCAACA | 2.3E-04 | 2760784 | -      | 149        |
| 54   | CAATCCACA | 4.6E-04 | 2009753 | -      | -68        |
| 54   | TCATCAACA | 1.9E-04 | 2009887 | -      | 66         |
| 54   | ATTTCCACA | 2.3E-04 | 2010214 | +      | 393        |
| 55   | CCTTCCACA | 1.4E-03 | 3822968 | +      | -16        |
| 55   | CTATCCACA | 3.2E-05 | 3822986 | +      | 2          |
| 56   | AAATCCACA | 4.3E-04 | 2040584 | +      | -23        |
| 56   | TTGCTAACA | 1.5E-03 | 2040618 | +      | 11         |
| 56   | ATACCAACA | 1.3E-03 | 2040662 | -      | 55         |
| 57   | TTTTCCACA | 4.3E-05 | 2861520 | +      | -67        |
| 57   | GTATCAACA | 2.3E-04 | 2861624 | +      | 37         |
| 57   | TTGTTTACA | 4.3E-05 | 2861635 | -      | 48         |
| 58   | TTATTAACT | 1.0E-03 | 4111680 | -      | -386       |
| 58   | TTATCAATA | 1.2E-03 | 4111731 | -      | -335       |
| 58   | TTATACACA | 5.9E-05 | 4112038 | +      | -28        |
| 58   | TTATTAACT | 1.0E-03 | 4112070 | -      | 4          |
| 58   | CTTTCCACA | 2.9E-04 | 4112301 | +      | 235        |
| 59   | TCATCAACA | 1.9E-04 | 3430955 | +      | -157       |
| 59   | TCATCAACA | 1.9E-04 | 3431099 | +      | -13        |
| 59   | TTATTCACA | 1.6E-05 | 3431114 | +      | 2          |
| 59   | TTGTCACCA | 8.1E-04 | 3431466 | -      | 354        |
| 60   | ATATGCACA | 2.9E-04 | 2170488 | +      | -361       |
| 60   | TTATTAACA | 7.3E-05 | 2170826 | +      | -23        |
| 60   | TTATCTACA | 6.2E-04 | 2170866 | +      | 17         |
| 60   | TCATTCCCA | 1.5E-03 | 2170881 | +      | 32         |
| 61   | ATATCAACA | 1.3E-04 | 918657  | +      | -49        |
| 61   | GTGTCCACA | 2.0E-04 | 918691  | +      | -15        |
| 61   | TTATCCTCA | 6.2E-04 | 918723  | -      | 17         |
| 61   | ATATAAACA | 8.7E-04 | 918813  | +      | 107        |
| 62   | ATATACACA | 2.9E-04 | 3222540 | -      | -316       |
| 62   | TAATAAACA | 1.5E-03 | 3222722 | -      | -134       |
| 62   | TTATACACA | 5.9E-05 | 3222919 | +      | 63         |
| 62   | GTATGAACA | 1.3E-03 | 3223220 | +      | 364        |
| 63   | TTGTGCACA | 1.5E-04 | 415844  | +      | -228       |
| 63   | ATATCCCCA | 5.2E-04 | 416085  | +      | 13         |
| 63   | TTATCAACA | 2.3E-05 | 416094  | -      | 22         |
| 63   | AGATCAACA | 1.4E-03 | 416203  | +      | 131        |
| 64   | TTATCCACA | 5.3E-06 | 202042  | -      | -42        |

| peak | sequence  | p_value | start   | strand | bp to peak |
|------|-----------|---------|---------|--------|------------|
| 64   | TTTTCCACT | 8.7E-04 | 202160  | -      | 76         |
| 64   | GTATTAACA | 5.2E-04 | 202316  | -      | 232        |
| 64   | TTATTGACA | 8.1E-04 | 202434  | +      | 350        |
| 65   | TTATCAACG | 1.0E-03 | 2171704 | +      | -24        |
| 65   | TTTTCCCCA | 6.2E-04 | 2171728 | +      | 0          |
| 65   | GTATACACA | 5.2E-04 | 2171761 | -      | 33         |
| 66   | ATATCACCA | 1.4E-03 | 643815  | -      | -129       |
| 66   | TTATCAACA | 2.3E-05 | 643938  | -      | -6         |
| 66   | ATGTCCCCA | 1.1E-03 | 644043  | -      | 99         |
| 66   | TCATCAACA | 1.9E-04 | 644052  | -      | 108        |
| 66   | TTATCACCA | 3.9E-04 | 644311  | -      | 367        |
| 67   | ATATTCACT | 1.4E-03 | 3645140 | -      | -244       |
| 67   | TTATCCACT | 1.7E-04 | 3645395 | +      | 11         |
| 67   | TTATCAATA | 1.2E-03 | 3645488 | -      | 104        |
| 67   | ATATTCACT | 1.4E-03 | 3645748 | +      | 364        |
| 68   | ATGTTCACA | 2.3E-04 | 666568  | -      | -145       |
| 68   | CAATTCACA | 1.0E-03 | 666695  | -      | -18        |
| 68   | TTCTCAACA | 7.0E-04 | 666706  | -      | -7         |
| 68   | TTATTCACA | 1.6E-05 | 666779  | +      | 66         |
| 68   | TGATCCCCA | 1.4E-03 | 667017  | -      | 304        |
| 69   | TGTTTCACA | 1.4E-03 | 2042255 | +      | -196       |
| 69   | ATAATCACA | 1.5E-03 | 2042392 | +      | -59        |
| 69   | TTTTACACA | 3.9E-04 | 2042441 | +      | -10        |
| 69   | ATATCGACA | 1.3E-03 | 2042456 | +      | 5          |
| 69   | AAATTCACA | 9.6E-04 | 2042541 | -      | 90         |
| 69   | ATGTCAACA | 2.9E-04 | 2042651 | +      | 200        |
| 69   | CTACCAACA | 1.4E-03 | 2042827 | -      | 376        |
| 70   | TTATCTACA | 6.2E-04 | 2216934 | +      | -46        |
| 70   | TTATTGACA | 8.1E-04 | 2217039 | -      | 59         |
| 70   | TGATCAACA | 4.3E-04 | 2217153 | +      | 173        |
| 70   | AAATCAACA | 1.1E-03 | 2217194 | +      | 214        |
| 70   | TTATTAACA | 7.3E-05 | 2217323 | +      | 343        |
| 71   | GTATACACA | 5.2E-04 | 1886249 | -      | -311       |
| 71   | GTGTACACA | 1.1E-03 | 1886435 | +      | -125       |
| 71   | CTATAAACA | 9.6E-04 | 1886566 | +      | 6          |
| 71   | TTGTCCCCA | 2.9E-04 | 1886575 | -      | 15         |
| 71   | CTATTCACT | 1.5E-03 | 1886628 | -      | 68         |
| 71   | TTATTCAGA | 1.4E-03 | 1886741 | +      | 181        |
| 72   | GTTTCCACA | 4.6E-04 | 546254  | -      | -122       |
| 72   | TTATCCCCA | 1.3E-04 | 546382  | +      | 6          |
| 72   | TTATCTACA | 6.2E-04 | 546401  | +      | 25         |
| 72   | TTGTTAACA | 1.7E-04 | 546488  | -      | 112        |
| 73   | TTTCTCACA | 1.3E-03 | 1369223 | +      | -291       |
| 73   | TTAATAACA | 1.1E-03 | 1369447 | -      | -67        |
| 73   | TTACCAACA | 3.9E-04 | 1369478 | -      | -36        |
| 73   | TTGTCAACA | 7.3E-05 | 1369509 | +      | -5         |



| peak | sequence  | p_value | start   | strand | bp to peak |
|------|-----------|---------|---------|--------|------------|
| 73   | TTATTTACA | 1.3E-03 | 1369533 | +      | 19         |
| 73   | TTATCCACC | 3.9E-04 | 1369836 | -      | 322        |
| 74   | TTGTCTACA | 1.3E-03 | 2228985 | -      | -326       |
| 74   | TTGTCCATA | 1.0E-03 | 2229229 | -      | -82        |
| 74   | TTCTTAACA | 1.5E-03 | 2229273 | -      | -38        |
| 74   | ATGTCCACA | 9.3E-05 | 2229306 | -      | -5         |
| 74   | TTCTCAACA | 7.0E-04 | 2229360 | -      | 49         |
| 74   | ATTTTAACA | 1.5E-03 | 2229508 | +      | 197        |
| 75   | TTTTCCACT | 8.7E-04 | 3233583 | +      | -39        |
| 75   | ATATTAACA | 3.4E-04 | 3233609 | -      | -13        |
| 75   | ATATCCCCA | 5.2E-04 | 3233625 | +      | 3          |
| 75   | TTGTCCATA | 1.0E-03 | 3233706 | +      | 84         |
| 75   | AAATTCACA | 9.6E-04 | 3233850 | -      | 228        |
| 76   | TGATCCCCA | 1.4E-03 | 2210860 | -      | -286       |
| 76   | TTTTACACA | 3.9E-04 | 2211045 | -      | -101       |
| 76   | ATTTTAACA | 1.5E-03 | 2211140 | +      | -6         |
| 76   | TTCCAACA  | 1.5E-03 | 2211272 | +      | 126        |
| 76   | TGTTCCACA | 7.0E-04 | 2211504 | -      | 358        |
| 77   | TTTTCCACA | 4.3E-05 | 2870061 | -      | -28        |
| 77   | TTATCCTCA | 6.2E-04 | 2870085 | +      | -4         |
| 77   | GTGTCAACA | 5.2E-04 | 2870248 | +      | 159        |
| 77   | ATATAAACA | 8.7E-04 | 2870404 | +      | 315        |
| 78   | ATATCAACA | 1.3E-04 | 1768475 | +      | -90        |
| 78   | TTTTTCACA | 1.3E-04 | 1768560 | +      | -5         |
| 78   | TTAACAACA | 4.9E-04 | 1768616 | +      | 51         |
| 78   | TTATACACA | 5.9E-05 | 1768675 | +      | 110        |
| 78   | TCTTCAACA | 9.6E-04 | 1768829 | -      | 264        |
| 78   | TTTTTCCCA | 1.4E-03 | 1768886 | +      | 321        |
| 79   | ATATTAACA | 3.4E-04 | 1250048 | -      | -25        |
| 79   | TTTTCAACA | 1.7E-04 | 1250075 | +      | 2          |
| 80   | CCATCAACA | 8.7E-04 | 727825  | +      | -132       |
| 80   | AGATTCACA | 1.2E-03 | 727893  | +      | -64        |
| 80   | TTATAAACA | 2.0E-04 | 728105  | +      | 148        |
| 81   | TCATTAACA | 4.6E-04 | 646029  | -      | -391       |
| 81   | AAATCAACA | 1.1E-03 | 646356  | -      | -64        |
| 81   | ATATAAACA | 8.7E-04 | 646395  | -      | -25        |
| 81   | TTTTCCACT | 8.7E-04 | 646447  | +      | 27         |
| 81   | TTGTAAACA | 4.6E-04 | 646544  | -      | 124        |
| 82   | TTGATCACA | 8.7E-04 | 2302293 | +      | -273       |
| 82   | TATTCAACA | 1.3E-03 | 2302325 | -      | -241       |
| 82   | ACATGCACA | 1.4E-03 | 2302558 | +      | -8         |
| 82   | TTATCAACA | 2.3E-05 | 2302603 | +      | 37         |
| 82   | ATGTCAACA | 2.9E-04 | 2302631 | -      | 65         |
| 82   | TTATCAATA | 1.2E-03 | 2302889 | -      | 323        |
| 83   | TTGCCAACA | 8.1E-04 | 1856118 | -      | -121       |
| 83   | ATATCAACA | 1.3E-04 | 1856280 | -      | 41         |

| peak | sequence   | p_value | start   | strand | bp to peak |
|------|------------|---------|---------|--------|------------|
| 84   | AAATCCACA  | 4.3E-04 | 2244172 | -      | -273       |
| 84   | ATATCGACA  | 1.3E-03 | 2244376 | +      | -69        |
| 84   | TTACTCACA  | 2.9E-04 | 2244409 | -      | -36        |
| 84   | ATATCAACA  | 1.3E-04 | 2244453 | -      | 8          |
| 84   | TTTTGAACA  | 9.6E-04 | 2244503 | -      | 58         |
| 84   | TTTTTCACA  | 1.3E-04 | 2244555 | -      | 110        |
| 84   | TGATCAACA  | 4.3E-04 | 2244629 | -      | 184        |
| 84   | ATATTAACA  | 3.4E-04 | 2244776 | +      | 331        |
| 84   | TTACCAACA  | 3.9E-04 | 2244835 | -      | 390        |
| 85   | GCATCAACA  | 1.3E-03 | 1974956 | +      | -338       |
| 85   | TTTTAAACA  | 1.0E-03 | 1975148 | +      | -146       |
| 85   | TTTTACACA  | 3.9E-04 | 1975241 | +      | -53        |
| 85   | TTACTCACA  | 2.9E-04 | 1975297 | -      | 3          |
| 85   | TTAAGCACA  | 1.0E-03 | 1975453 | +      | 159        |
| 86   | TAATCCACA  | 8.2E-05 | 3900226 | +      | -36        |
| 86   | ATATTCACA  | 9.3E-05 | 3900268 | +      | 6          |
| 86   | GTTTTTCACA | 1.0E-03 | 3900282 | -      | 20         |
| 87   | TTATTTACA  | 1.3E-03 | 2681545 | +      | -332       |
| 87   | TTATCACCA  | 3.9E-04 | 2681722 | +      | -155       |
| 87   | TTATTAACT  | 1.0E-03 | 2681789 | +      | -88        |
| 87   | TTTTCCACA  | 4.3E-05 | 2681923 | -      | 46         |
| 87   | TTATCAACG  | 1.0E-03 | 2681936 | -      | 59         |
| 88   | ATTTGCACA  | 1.3E-03 | 650778  | -      | -279       |
| 88   | TTTTTAACA  | 4.3E-04 | 650924  | -      | -133       |
| 88   | TTATGCACA  | 5.9E-05 | 651051  | +      | -6         |
| 88   | TAATCAACA  | 2.6E-04 | 651117  | -      | 60         |
| 88   | TTTTCCACA  | 4.3E-05 | 651196  | -      | 139        |
| 89   | TTAAACACA  | 1.0E-03 | 526032  | -      | -305       |
| 89   | TTGTCAACA  | 7.3E-05 | 526299  | -      | -38        |
| 89   | CAATCCACA  | 4.6E-04 | 526370  | -      | 33         |
| 89   | GTTTTTCACA | 1.0E-03 | 526379  | +      | 42         |
| 89   | TTATCAACT  | 4.9E-04 | 526434  | -      | 97         |
| 89   | TTGTTCCCA  | 6.2E-04 | 526486  | -      | 149        |
| 90   | TTATTCATA  | 1.0E-03 | 4152557 | -      | -224       |
| 90   | TTAATAACA  | 1.1E-03 | 4152758 | -      | -23        |
| 90   | GTGTACACA  | 1.1E-03 | 4152773 | +      | -8         |
| 90   | TAATAAACA  | 1.5E-03 | 4152831 | -      | 50         |
| 90   | ATATACACA  | 2.9E-04 | 4152935 | -      | 154        |
| 90   | ATATTCACA  | 9.3E-05 | 4153020 | +      | 239        |
| 91   | ATATGAACA  | 8.1E-04 | 2630360 | -      | -353       |
| 91   | ATATTCACA  | 9.3E-05 | 2630638 | -      | -75        |
| 91   | CCTTCCACA  | 1.4E-03 | 2630747 | +      | 34         |
| 91   | TTTTAAACA  | 1.0E-03 | 2630761 | +      | 48         |
| 91   | ACGTCAACA  | 1.5E-03 | 2631017 | +      | 304        |
| 92   | ATATGAACA  | 8.1E-04 | 211543  | +      | -263       |
| 92   | ATATCGACA  | 1.3E-03 | 211777  | +      | -29        |

| peak | sequence   | p_value | start   | strand | bp to peak |
|------|------------|---------|---------|--------|------------|
| 92   | TAATAAACA  | 1.5E-03 | 211836  | -      | 30         |
| 92   | TTATTACCA  | 8.7E-04 | 212000  | +      | 194        |
| 93   | TTATCAACT  | 4.9E-04 | 543310  | +      | 8          |
| 93   | ATATCCACT  | 7.0E-04 | 543369  | -      | 67         |
| 93   | TGATTCACA  | 3.4E-04 | 543503  | -      | 201        |
| 93   | TTATTTACA  | 1.3E-03 | 543577  | -      | 275        |
| 94   | TATTCACA   | 1.3E-03 | 347558  | +      | -65        |
| 94   | CAATCCACA  | 4.6E-04 | 347597  | -      | -26        |
| 94   | TTTTCCACA  | 4.3E-05 | 347723  | +      | 100        |
| 94   | TTATTACCA  | 8.7E-04 | 347988  | +      | 365        |
| 95   | TTTTAAACA  | 1.0E-03 | 2946809 | -      | -95        |
| 95   | TTATCTACA  | 6.2E-04 | 2946911 | +      | 7          |
| 95   | ATACCAACA  | 1.3E-03 | 2946933 | +      | 29         |
| 95   | CTATCAACA  | 1.5E-04 | 2947026 | +      | 122        |
| 96   | ATATGAACA  | 8.1E-04 | 659544  | +      | -237       |
| 96   | TGATTCACA  | 3.4E-04 | 659575  | +      | -206       |
| 96   | TTATGCACA  | 5.9E-05 | 659778  | +      | -3         |
| 96   | TTATTCATA  | 1.0E-03 | 659989  | -      | 208        |
| 96   | TTGTCACCA  | 8.1E-04 | 660150  | +      | 369        |
| 97   | TTATTCACC  | 8.7E-04 | 533438  | -      | -391       |
| 97   | TTTTCCACA  | 4.3E-05 | 533523  | -      | -306       |
| 97   | TAATAAACA  | 1.5E-03 | 533612  | -      | -217       |
| 97   | TTTTAAACA  | 1.0E-03 | 533806  | +      | -23        |
| 97   | TCATCCACA  | 5.9E-05 | 533817  | +      | -12        |
| 97   | TTTCCAACA  | 1.5E-03 | 533913  | -      | 84         |
| 97   | TTCTCCACA  | 2.6E-04 | 533980  | -      | 151        |
| 97   | TTATTTACA  | 1.3E-03 | 534165  | -      | 336        |
| 98   | TTCTTAACA  | 1.5E-03 | 584999  | -      | -220       |
| 98   | TTATTCTCA  | 1.4E-03 | 585105  | -      | -114       |
| 98   | ATATCCCCA  | 5.2E-04 | 585213  | -      | -6         |
| 98   | TGATCCACA  | 1.3E-04 | 585225  | -      | 6          |
| 98   | TTATCCATA  | 4.9E-04 | 585258  | -      | 39         |
| 98   | TCATACACA  | 4.3E-04 | 585529  | +      | 310        |
| 98   | ATTTCCACA  | 2.3E-04 | 585544  | +      | 325        |
| 99   | TTTTTCCCA  | 1.4E-03 | 2860335 | +      | -163       |
| 99   | TTATTAACA  | 7.3E-05 | 2860469 | -      | -29        |
| 99   | TTATACACA  | 5.9E-05 | 2860518 | +      | 20         |
| 99   | TTCTCCACA  | 2.6E-04 | 2860786 | +      | 288        |
| 100  | TTATCAACA  | 2.3E-05 | 3664578 | -      | 5          |
| 100  | ACG TTCACA | 1.3E-03 | 3664790 | -      | 217        |
| 101  | TTATGAACA  | 1.9E-04 | 1518956 | +      | -370       |
| 101  | TTATCACCA  | 3.9E-04 | 1518983 | +      | -343       |
| 101  | TTATACACA  | 5.9E-05 | 1519273 | -      | -53        |
| 101  | TAATACACA  | 5.7E-04 | 1519342 | -      | 16         |
| 102  | TTATTCACA  | 1.6E-05 | 2572747 | +      | -16        |
| 102  | TTATCCATA  | 4.9E-04 | 2572925 | +      | 162        |

| peak | sequence   | p_value | start   | strand | bp to peak |
|------|------------|---------|---------|--------|------------|
| 103  | TTATCAACA  | 2.3E-05 | 3661152 | +      | -1         |
| 103  | TTATCAACC  | 1.0E-03 | 3661173 | -      | 20         |
| 103  | TTTTGAACA  | 9.6E-04 | 3661368 | -      | 215        |
| 104  | TCGTCCACA  | 1.5E-04 | 1096308 | -      | -90        |
| 104  | AAATCAACA  | 1.1E-03 | 1096404 | -      | 6          |
| 104  | TTGTTCACA  | 4.3E-05 | 1096424 | +      | 26         |
| 104  | TCTTCAACA  | 9.6E-04 | 1096730 | +      | 332        |
| 104  | TTGTCCACA  | 9.3E-06 | 1096790 | +      | 392        |
| 105  | TTTTTAACA  | 4.3E-04 | 3599544 | +      | -118       |
| 105  | TCATCCACA  | 5.9E-05 | 3599670 | +      | 8          |
| 105  | ACATCCACA  | 2.6E-04 | 3599720 | +      | 58         |
| 106  | TTCTTAACA  | 1.5E-03 | 1657089 | -      | -375       |
| 106  | ATATTAACA  | 3.4E-04 | 1657125 | -      | -339       |
| 106  | ATTTCAACA  | 7.0E-04 | 1657141 | -      | -323       |
| 106  | TGATCAACA  | 4.3E-04 | 1657448 | +      | -16        |
| 106  | TTGTCCACA  | 9.3E-06 | 1657471 | +      | 7          |
| 106  | TGATCAACA  | 4.3E-04 | 1657493 | -      | 29         |
| 106  | TTATTCACC  | 8.7E-04 | 1657817 | +      | 353        |
| 107  | TTACCAACA  | 3.9E-04 | 1866389 | -      | -200       |
| 107  | GCATCCACA  | 4.9E-04 | 1866477 | +      | -112       |
| 107  | TTGTTCACA  | 4.3E-05 | 1866585 | +      | -4         |
| 107  | TATTCAACA  | 1.3E-03 | 1866632 | -      | 43         |
| 107  | TAATGCACA  | 5.2E-04 | 1866714 | +      | 125        |
| 107  | TTATTTACA  | 1.3E-03 | 1866856 | -      | 267        |
| 108  | TGGTCCACA  | 2.9E-04 | 2711790 | -      | -176       |
| 108  | TTATACACA  | 5.9E-05 | 2711961 | +      | -5         |
| 108  | ATTTACACA  | 1.4E-03 | 2712144 | -      | 178        |
| 108  | ACATGCACA  | 1.4E-03 | 2712163 | -      | 197        |
| 109  | TCTTCCACA  | 3.4E-04 | 4110576 | +      | -67        |
| 109  | TTATTA ACT | 1.0E-03 | 4110596 | -      | -47        |
| 109  | TTATTC ACT | 4.3E-04 | 4110654 | +      | 11         |
| 109  | TTCTTAACA  | 1.5E-03 | 4110769 | +      | 126        |
| 109  | ATTTTAACA  | 1.5E-03 | 4110825 | -      | 182        |
| 109  | TCATTAACA  | 4.6E-04 | 4110898 | +      | 255        |
| 110  | TGATCAACA  | 4.3E-04 | 3300863 | -      | -113       |
| 110  | GTTTTCAACA | 1.0E-03 | 3300952 | +      | -24        |
| 110  | TTGTAAACA  | 4.6E-04 | 3300962 | -      | -14        |
| 110  | TAATACACA  | 5.7E-04 | 3300973 | -      | -3         |
| 110  | CTGTCAACA  | 3.4E-04 | 3301173 | -      | 197        |
| 111  | TTATAAACA  | 2.0E-04 | 4015025 | +      | 4          |
| 111  | TTTTTCCCA  | 1.4E-03 | 4015334 | +      | 313        |
| 112  | CGATCCACA  | 6.2E-04 | 121546  | -      | -170       |
| 112  | ATATTAACA  | 3.4E-04 | 121690  | -      | -26        |
| 112  | ATATCACCA  | 1.4E-03 | 122072  | +      | 356        |
| 113  | ATATCGACA  | 1.3E-03 | 3659098 | +      | -321       |
| 113  | TCTTCAACA  | 9.6E-04 | 3659305 | -      | -114       |

| peak | sequence   | p_value | start   | strand | bp to peak |
|------|------------|---------|---------|--------|------------|
| 113  | ATTTTAACA  | 1.5E-03 | 3659318 | -      | -101       |
| 113  | CTATTCACA  | 1.1E-04 | 3659421 | +      | 2          |
| 113  | ATGTTAACA  | 7.0E-04 | 3659439 | +      | 20         |
| 113  | ATTTCCACA  | 2.3E-04 | 3659513 | +      | 94         |
| 113  | TTGCTAACA  | 1.5E-03 | 3659697 | +      | 278        |
| 113  | TTATTCAGA  | 1.4E-03 | 3659806 | +      | 387        |
| 114  | ATATCCACT  | 7.0E-04 | 2611132 | +      | -176       |
| 114  | TTATTCACA  | 1.6E-05 | 2611269 | -      | -39        |
| 114  | ACATCAACA  | 8.1E-04 | 2611321 | +      | 13         |
| 114  | TTAATCACA  | 4.3E-04 | 2611341 | -      | 33         |
| 114  | TTATCAATA  | 1.2E-03 | 2611364 | +      | 56         |
| 114  | CCATCAACA  | 8.7E-04 | 2611475 | +      | 167        |
| 115  | TAATAAACA  | 1.5E-03 | 3661958 | +      | -193       |
| 115  | CTATTAACA  | 3.9E-04 | 3662026 | +      | -125       |
| 115  | TTATTTACA  | 1.3E-03 | 3662051 | +      | -100       |
| 115  | TTGCCAACA  | 8.1E-04 | 3662183 | -      | 32         |
| 115  | TTGTCCACC  | 8.1E-04 | 3662196 | +      | 45         |
| 115  | TTATTCTCA  | 1.4E-03 | 3662210 | -      | 59         |
| 115  | TTTTCCACT  | 8.7E-04 | 3662295 | -      | 144        |
| 116  | GTTTTCAACA | 1.0E-03 | 3442609 | -      | -254       |
| 116  | TTCTCAACA  | 7.0E-04 | 3442887 | +      | 24         |
| 116  | ATTTTCACA  | 5.7E-04 | 3442959 | -      | 96         |
| 116  | TCTTTCACA  | 8.1E-04 | 3443247 | +      | 384        |
| 117  | ATGTCCACA  | 9.3E-05 | 2128220 | +      | -94        |
| 117  | CTGTTCACA  | 2.6E-04 | 2128303 | -      | -11        |
| 117  | CTTTCCACA  | 2.9E-04 | 2128378 | +      | 64         |
| 118  | CTGTGCACA  | 7.0E-04 | 548092  | -      | -24        |
| 118  | TTATGAACA  | 1.9E-04 | 548173  | -      | 57         |
| 118  | TCCTCCACA  | 1.3E-03 | 548400  | +      | 284        |
| 119  | TTTTCAACA  | 1.7E-04 | 108396  | -      | -337       |
| 119  | TTTTTAACA  | 4.3E-04 | 108652  | -      | -81        |
| 119  | ATACCAACA  | 1.3E-03 | 108721  | -      | -12        |
| 119  | TTAATAACA  | 1.1E-03 | 108779  | +      | 46         |
| 119  | CTATCCACT  | 8.1E-04 | 108873  | -      | 140        |
| 120  | TTGTCCAGA  | 1.4E-03 | 2560487 | -      | -151       |
| 120  | TTCTTAACA  | 1.5E-03 | 2560532 | +      | -106       |
| 120  | TTTTTAACA  | 4.3E-04 | 2560555 | +      | -83        |
| 120  | TCATCAACA  | 1.9E-04 | 2560710 | +      | 72         |
| 120  | ATGTCCCA   | 1.1E-03 | 2560928 | +      | 290        |
| 121  | TTATACACT  | 9.6E-04 | 2182564 | +      | -8         |
| 121  | TAGTCAACA  | 5.7E-04 | 2182763 | -      | 191        |
| 121  | TTATTAACT  | 1.0E-03 | 2182910 | +      | 338        |
| 122  | TGGTCAACA  | 8.7E-04 | 618442  | -      | -76        |
| 122  | TTGTAAACA  | 4.6E-04 | 618534  | -      | 16         |
| 122  | TTATACACA  | 5.9E-05 | 618554  | -      | 36         |
| 123  | TTCTTAACA  | 1.5E-03 | 2201801 | +      | -390       |

| peak | sequence  | p_value | start   | strand | bp to peak |
|------|-----------|---------|---------|--------|------------|
| 123  | TAATCCACT | 1.3E-03 | 2201976 | +      | -215       |
| 123  | ATGTCAACA | 2.9E-04 | 2201995 | +      | -196       |
| 123  | TTATTCAGA | 1.4E-03 | 2202176 | -      | -15        |
| 123  | TTTTCAACA | 1.7E-04 | 2202323 | -      | 132        |
| 123  | CAATCAACA | 1.2E-03 | 2202544 | -      | 353        |
| 124  | TGATCAACA | 4.3E-04 | 2321951 | +      | -286       |
| 124  | GTGTCCACA | 2.0E-04 | 2322223 | +      | -14        |
| 124  | CTTTCAACA | 8.1E-04 | 2322267 | -      | 30         |
| 125  | TTGTCCCCA | 2.9E-04 | 4164819 | -      | -306       |
| 125  | TCATCAACA | 1.9E-04 | 4165055 | -      | -70        |
| 125  | ATTTGCACA | 1.3E-03 | 4165178 | -      | 53         |
| 125  | TTATCAATA | 1.2E-03 | 4165297 | +      | 172        |
| 126  | TCATCAACA | 1.9E-04 | 3845937 | +      | -37        |
| 126  | CTTTCCACA | 2.9E-04 | 3845958 | -      | -16        |
| 126  | ATGTTCACA | 2.3E-04 | 3845981 | +      | 7          |
| 126  | TTTTCCACA | 4.3E-05 | 3846115 | -      | 141        |
| 127  | TTATTCACA | 1.6E-05 | 1922149 | -      | -4         |
| 127  | ATTTACACA | 1.4E-03 | 1922205 | -      | 52         |
| 127  | CTATTAACA | 3.9E-04 | 1922253 | -      | 100        |
| 127  | TTTTTAACA | 4.3E-04 | 1922414 | -      | 261        |
| 128  | TTTTTAACA | 4.3E-04 | 2697489 | -      | -269       |
| 128  | ATATGAACA | 8.1E-04 | 2697700 | -      | -58        |
| 128  | AAATCCACA | 4.3E-04 | 2697754 | +      | -4         |
| 128  | TTATAAACA | 2.0E-04 | 2697783 | +      | 25         |
| 128  | TTTTTAACA | 4.3E-04 | 2697892 | -      | 134        |
| 128  | TTTTCAACA | 1.7E-04 | 2697941 | +      | 183        |
| 128  | TCATGAACA | 1.0E-03 | 2698136 | +      | 378        |
| 129  | ACATGCACA | 1.4E-03 | 2193956 | -      | -349       |
| 129  | TTGTTAACA | 1.7E-04 | 2194263 | +      | -42        |
| 129  | AAATCAACA | 1.1E-03 | 2194302 | -      | -3         |
| 129  | TTATCCACT | 1.7E-04 | 2194414 | -      | 109        |
| 129  | ATTTCCACA | 2.3E-04 | 2194693 | +      | 388        |
| 130  | GTTTCAACA | 1.2E-03 | 1320347 | +      | -382       |
| 130  | TTGTCCATA | 1.0E-03 | 1320361 | -      | -368       |
| 130  | TAATGAACA | 1.4E-03 | 1320607 | +      | -122       |
| 130  | TCTTTCACA | 8.1E-04 | 1320616 | -      | -113       |
| 130  | TAATACACA | 5.7E-04 | 1320714 | +      | -15        |
| 130  | TTTTCAACA | 1.7E-04 | 1320850 | +      | 121        |
| 130  | TTATCAACC | 1.0E-03 | 1320946 | -      | 217        |
| 130  | TCTTTCACA | 8.1E-04 | 1320979 | +      | 250        |
| 130  | TAATGAACA | 1.4E-03 | 1321113 | +      | 384        |
| 131  | TTGTCTACA | 1.3E-03 | 2707153 | +      | 11         |
| 132  | ACGTCAACA | 1.5E-03 | 3217453 | +      | -107       |
| 132  | TTATCAACA | 2.3E-05 | 3217566 | -      | 6          |
| 132  | ATACTCACA | 1.1E-03 | 3217808 | +      | 248        |
| 133  | GTATAAACA | 1.3E-03 | 1517267 | +      | -337       |

| peak | sequence  | p_value | start   | strand | bp to peak |
|------|-----------|---------|---------|--------|------------|
| 133  | ATGTCAACA | 2.9E-04 | 1517584 | -      | -20        |
| 133  | TCATCAACA | 1.9E-04 | 1517775 | -      | 171        |
| 134  | TTATTAACA | 7.3E-05 | 1016150 | -      | -39        |
| 134  | TCTTCCACA | 3.4E-04 | 1016185 | +      | -4         |
| 134  | TTATTCACA | 1.6E-05 | 1016326 | +      | 137        |
| 134  | TTTTGAACA | 9.6E-04 | 1016474 | -      | 285        |
| 135  | GTATTCACA | 2.0E-04 | 1956219 | -      | -60        |
| 135  | TTTTCAACA | 1.7E-04 | 1956293 | -      | 14         |
| 135  | GCATCAACA | 1.3E-03 | 1956330 | +      | 51         |
| 136  | CTATCCCA  | 5.7E-04 | 2629490 | +      | -4         |
| 136  | TTATCCTCA | 6.2E-04 | 2629564 | +      | 70         |
| 136  | TACTAACA  | 8.1E-04 | 2629579 | +      | 85         |
| 137  | ATATCAACA | 1.3E-04 | 635872  | +      | -1         |
| 137  | TTGCTAACA | 1.5E-03 | 635898  | -      | 25         |
| 138  | TTATCTACA | 6.2E-04 | 803657  | -      | -162       |
| 138  | TTAATAACA | 1.1E-03 | 803833  | +      | 14         |
| 138  | TTAATAACA | 1.1E-03 | 803894  | -      | 75         |
| 138  | TTTTAAACA | 1.0E-03 | 803983  | +      | 164        |
| 139  | TAATAAACA | 1.5E-03 | 3649040 | +      | -138       |
| 139  | TCATAAACA | 1.1E-03 | 3649091 | +      | -87        |
| 139  | TAATCCACA | 8.2E-05 | 3649177 | +      | -1         |
| 139  | CTGTCAACA | 3.4E-04 | 3649280 | +      | 102        |
| 140  | TTATTCAGA | 1.4E-03 | 949018  | +      | -91        |
| 140  | TTATCCACA | 5.3E-06 | 949114  | -      | 5          |
| 141  | TCATTCACA | 1.5E-04 | 3171557 | -      | -183       |
| 141  | TTATCACCA | 3.9E-04 | 3171773 | -      | 33         |
| 141  | TTACCCCA  | 1.3E-03 | 3171791 | +      | 51         |
| 141  | TGATTAACA | 8.7E-04 | 3172088 | +      | 348        |
| 142  | ATATTAACA | 3.4E-04 | 3469630 | +      | -38        |
| 142  | TTATTGACA | 8.1E-04 | 3469663 | -      | -5         |
| 142  | TTGTCAACA | 7.3E-05 | 3469850 | +      | 182        |
| 143  | TCATCAACA | 1.9E-04 | 1439870 | -      | -20        |
| 143  | ATATTCACA | 9.3E-05 | 1439950 | +      | 60         |
| 144  | ATATAAACA | 8.7E-04 | 2702719 | -      | -388       |
| 144  | TCATCAACA | 1.9E-04 | 2702814 | +      | -293       |
| 144  | TTATTCACA | 1.6E-05 | 2703102 | +      | -5         |
| 144  | ATACCAACA | 1.3E-03 | 2703199 | +      | 92         |
| 144  | ATTTTAACA | 1.5E-03 | 2703301 | -      | 194        |
| 145  | ATATCCACT | 7.0E-04 | 4062483 | +      | -139       |
| 145  | TCATGCACA | 4.3E-04 | 4062574 | +      | -48        |
| 145  | TCATAAACA | 1.1E-03 | 4062643 | +      | 21         |
| 145  | ATATCAACA | 1.3E-04 | 4062944 | +      | 322        |
| 146  | CTATCCACC | 1.5E-03 | 2235196 | -      | -140       |
| 146  | ACATTCACA | 6.2E-04 | 2235290 | +      | -46        |
| 146  | ATAATCACA | 1.5E-03 | 2235350 | +      | 14         |
| 146  | TTGTCCAGA | 1.4E-03 | 2235399 | +      | 63         |

| peak | sequence   | p_value | start   | strand | bp to peak |
|------|------------|---------|---------|--------|------------|
| 146  | CTTTTCACA  | 6.2E-04 | 2235456 | -      | 120        |
| 146  | TTGTGCACA  | 1.5E-04 | 2235631 | -      | 295        |
| 147  | GCATCAACA  | 1.3E-03 | 2427734 | +      | -336       |
| 147  | TTAATAACA  | 1.1E-03 | 2427986 | +      | -84        |
| 147  | TTAAACACA  | 1.0E-03 | 2428019 | +      | -51        |
| 147  | ATTTCCACA  | 2.3E-04 | 2428075 | -      | 5          |
| 147  | ATGTTTACA  | 2.3E-04 | 2428124 | +      | 54         |
| 147  | CTATGAACA  | 8.7E-04 | 2428221 | -      | 151        |
| 147  | TTGCCAACA  | 8.1E-04 | 2428353 | -      | 283        |
| 147  | TTTTTCACA  | 1.3E-04 | 2428373 | +      | 303        |
| 148  | GTTTCAACA  | 1.2E-03 | 2018279 | -      | -310       |
| 148  | TTATGAACA  | 1.9E-04 | 2018584 | -      | -5         |
| 148  | ATTTTAAACA | 1.5E-03 | 2018671 | +      | 82         |
| 148  | CCATCAACA  | 8.7E-04 | 2018911 | -      | 322        |
| 149  | GTTTTTACA  | 1.0E-03 | 1110867 | +      | -289       |
| 149  | AAATCAACA  | 1.1E-03 | 1110891 | -      | -265       |
| 149  | TTATCTACA  | 6.2E-04 | 1110935 | -      | -221       |
| 149  | CTATCCCCA  | 5.7E-04 | 1111165 | +      | 9          |
| 149  | TTATCCCCA  | 1.3E-04 | 1111250 | -      | 94         |
| 149  | TGTTTTACA  | 1.4E-03 | 1111474 | +      | 318        |
| 150  | GTATCAACA  | 2.3E-04 | 2680128 | +      | -167       |
| 150  | TTATTCACA  | 1.6E-05 | 2680300 | -      | 5          |
| 150  | AAATCCACA  | 4.3E-04 | 2680310 | -      | 15         |
| 150  | TTTTAAACA  | 1.0E-03 | 2680530 | -      | 235        |
| 150  | TCATAAACA  | 1.1E-03 | 2680557 | +      | 262        |
| 151  | TTATCCAGA  | 7.0E-04 | 2691714 | +      | -356       |
| 151  | GTATCCACT  | 1.1E-03 | 2691864 | +      | -206       |
| 151  | TCATCCACA  | 5.9E-05 | 2692065 | +      | -5         |
| 151  | TTATTTACA  | 1.3E-03 | 2692410 | +      | 340        |
| 152  | CTTTTCACA  | 6.2E-04 | 1579899 | -      | 39         |
| 152  | TTTCCCACA  | 6.2E-04 | 1580123 | -      | 263        |
| 153  | TTATGAACA  | 1.9E-04 | 532779  | +      | 9          |
| 153  | TTATCCTCA  | 6.2E-04 | 532837  | -      | 67         |
| 154  | TTATCTACA  | 6.2E-04 | 2216934 | +      | -382       |
| 154  | TTATTGACA  | 8.1E-04 | 2217039 | -      | -277       |
| 154  | TGATCAACA  | 4.3E-04 | 2217153 | +      | -163       |
| 154  | AAATCAACA  | 1.1E-03 | 2217194 | +      | -122       |
| 154  | TTATTAACA  | 7.3E-05 | 2217323 | +      | 7          |
| 154  | TAGTTAACA  | 1.3E-03 | 2217401 | -      | 85         |
| 154  | AAATCAACA  | 1.1E-03 | 2217422 | +      | 106        |
| 154  | TGTTTTACA  | 1.4E-03 | 2217559 | -      | 243        |
| 154  | TCTTCAACA  | 9.6E-04 | 2217598 | -      | 282        |
| 155  | TTTTGCACA  | 3.9E-04 | 725017  | +      | -257       |
| 155  | ATTTGCACA  | 1.3E-03 | 725144  | -      | -130       |
| 155  | GTATCAACA  | 2.3E-04 | 725381  | +      | 107        |
| 155  | TCATCAACA  | 1.9E-04 | 725572  | -      | 298        |



| peak | sequence  | p_value | start   | strand | bp to peak |
|------|-----------|---------|---------|--------|------------|
| 156  | CTTTTCACA | 6.2E-04 | 2980332 | +      | -258       |
| 156  | TTATACACA | 5.9E-05 | 2980570 | -      | -20        |
| 157  | TTGACCACA | 4.3E-04 | 1424517 | +      | -186       |
| 157  | TTGTGCACA | 1.5E-04 | 1424617 | -      | -86        |
| 157  | TTATTTACA | 1.3E-03 | 1424647 | +      | -56        |
| 157  | TTATCAACA | 2.3E-05 | 1424731 | -      | 28         |
| 157  | TAATAAACA | 1.5E-03 | 1424946 | +      | 243        |
| 157  | GAATTCACA | 1.5E-03 | 1424992 | +      | 289        |
| 158  | TTTTAAACA | 1.0E-03 | 1900103 | +      | -78        |
| 158  | TCATCCACA | 5.9E-05 | 1900179 | -      | -2         |
| 158  | ATCTCCACA | 1.0E-03 | 1900212 | -      | 31         |
| 158  | TTATACCCA | 8.1E-04 | 1900404 | +      | 223        |
| 159  | AAATCAACA | 1.1E-03 | 4009637 | -      | -134       |
| 159  | GAATTCACA | 1.5E-03 | 4009723 | -      | -48        |
| 159  | TTATCAACA | 2.3E-05 | 4009854 | -      | 83         |
| 160  | TTTTTCCCA | 1.4E-03 | 349442  | +      | -35        |
| 160  | TTATTAACA | 7.3E-05 | 349483  | +      | 6          |
| 160  | CTGTTAACA | 8.1E-04 | 349494  | +      | 17         |
| 160  | TTATTCACC | 8.7E-04 | 349843  | +      | 366        |
| 161  | TTATCAACA | 2.3E-05 | 2195488 | -      | 6          |
| 161  | TTATCAATA | 1.2E-03 | 2195728 | -      | 246        |
| 162  | ATTTTAACA | 1.5E-03 | 4109359 | +      | -253       |
| 162  | TTGTAAACA | 4.6E-04 | 4109554 | -      | -58        |
| 162  | ATATTAACA | 3.4E-04 | 4109735 | -      | 123        |
| 163  | TTATACACA | 5.9E-05 | 539626  | -      | -8         |
| 163  | TTATTAACA | 7.3E-05 | 539783  | +      | 149        |
| 163  | ATTTACACA | 1.4E-03 | 539875  | +      | 241        |
| 164  | TTGTCAACA | 7.3E-05 | 3156883 | +      | 8          |
| 164  | TGATGCACA | 8.1E-04 | 3156933 | -      | 58         |
| 164  | TGATACACA | 8.7E-04 | 3157046 | -      | 171        |
| 164  | ATGACCACA | 1.5E-03 | 3157144 | +      | 269        |
| 165  | CTTTGCACA | 1.4E-03 | 3744277 | +      | -377       |
| 165  | GTGTCAACA | 5.2E-04 | 3744521 | -      | -133       |
| 165  | TGATTAACA | 8.7E-04 | 3744608 | -      | -46        |
| 165  | TTGTCAACA | 7.3E-05 | 3744663 | +      | 9          |
| 166  | GTTTTCACA | 1.0E-03 | 1293174 | +      | -249       |
| 166  | CTTTCAACA | 8.1E-04 | 1293199 | +      | -224       |
| 166  | TTATGCACA | 5.9E-05 | 1293398 | -      | -25        |
| 166  | TCGTACACA | 8.7E-04 | 1293448 | -      | 25         |
| 166  | TTATCAACT | 4.9E-04 | 1293690 | +      | 267        |
| 167  | TCTTCCACA | 3.4E-04 | 2752027 | +      | -65        |
| 167  | TGATACACA | 8.7E-04 | 2752062 | -      | -30        |
| 167  | ATATCCACC | 1.4E-03 | 2752143 | +      | 51         |
| 167  | TTGTAAACA | 4.6E-04 | 2752162 | +      | 70         |
| 167  | ATTTGCACA | 1.3E-03 | 2752196 | -      | 104        |
| 168  | TTATTCTCA | 1.4E-03 | 2102967 | +      | -87        |

| peak | sequence   | p_value | start   | strand | bp to peak |
|------|------------|---------|---------|--------|------------|
| 168  | CGATTCACA  | 1.4E-03 | 2103013 | -      | -41        |
| 168  | TTTTCCACT  | 8.7E-04 | 2103051 | +      | -3         |
| 168  | TAATCCACA  | 8.2E-05 | 2103072 | -      | 18         |
| 168  | TCTTCCACA  | 3.4E-04 | 2103246 | -      | 192        |
| 169  | AAATCAACA  | 1.1E-03 | 1585390 | +      | 5          |
| 169  | CAATCCACA  | 4.6E-04 | 1585408 | +      | 23         |
| 170  | TCATCAACA  | 1.9E-04 | 3203409 | +      | -299       |
| 170  | TAGTACACA  | 1.2E-03 | 3203500 | -      | -208       |
| 170  | GTATAAACA  | 1.3E-03 | 3203640 | -      | -68        |
| 170  | TTATGCACA  | 5.9E-05 | 3203715 | +      | 7          |
| 170  | GTATGAACA  | 1.3E-03 | 3203879 | +      | 171        |
| 170  | TCATTCCCA  | 1.5E-03 | 3203983 | +      | 275        |
| 171  | TTATCCTCA  | 6.2E-04 | 3403582 | -      | -320       |
| 171  | GTTTCAACA  | 1.2E-03 | 3403861 | -      | -41        |
| 171  | TTATAAACA  | 2.0E-04 | 3403891 | -      | -11        |
| 171  | TCGTCAACA  | 4.3E-04 | 3403933 | -      | 31         |
| 171  | TTTTTCACA  | 1.3E-04 | 3404109 | +      | 207        |
| 172  | TTTTGCACA  | 3.9E-04 | 1476926 | -      | -335       |
| 172  | TTTTCAACA  | 1.7E-04 | 1477129 | +      | -132       |
| 172  | TTATTCTCA  | 1.4E-03 | 1477173 | -      | -88        |
| 172  | TTATCAACT  | 4.9E-04 | 1477265 | -      | 4          |
| 173  | TTATTCACT  | 4.3E-04 | 4153486 | +      | -23        |
| 173  | TTATCAATA  | 1.2E-03 | 4153527 | +      | 18         |
| 173  | TTATTCACT  | 4.3E-04 | 4153710 | +      | 201        |
| 173  | TTATTCCCA  | 2.9E-04 | 4153768 | +      | 259        |
| 173  | TAATAAACA  | 1.5E-03 | 4153812 | -      | 303        |
| 174  | AAATTCACA  | 9.6E-04 | 3703433 | +      | -268       |
| 174  | ATATTCACA  | 9.3E-05 | 3703689 | +      | -12        |
| 174  | ATGTCCACA  | 9.3E-05 | 3703699 | -      | -2         |
| 175  | TTATTCACA  | 1.6E-05 | 3896458 | +      | 5          |
| 175  | TTTACCACA  | 9.6E-04 | 3896553 | +      | 100        |
| 175  | CTTTTCACA  | 6.2E-04 | 3896639 | +      | 186        |
| 176  | TTGATCACA  | 8.7E-04 | 1448917 | +      | -206       |
| 176  | TTATGAACA  | 1.9E-04 | 1449115 | +      | -8         |
| 176  | AAATTCACA  | 9.6E-04 | 1449132 | +      | 9          |
| 176  | TTTTTCCCA  | 1.4E-03 | 1449321 | -      | 198        |
| 176  | TCTTCAACA  | 9.6E-04 | 1449496 | -      | 373        |
| 177  | TCGTCAACA  | 4.3E-04 | 974617  | -      | -330       |
| 177  | TTATACACA  | 5.9E-05 | 974940  | -      | -7         |
| 177  | TGATCAACA  | 4.3E-04 | 974984  | -      | 37         |
| 177  | ATTTGCACA  | 1.3E-03 | 975234  | -      | 287        |
| 177  | TTTTTCCCA  | 1.4E-03 | 975294  | -      | 347        |
| 178  | CTATAAACA  | 9.6E-04 | 329365  | +      | -393       |
| 178  | TTATGAACA  | 1.9E-04 | 329660  | -      | -98        |
| 178  | TATTTCAACA | 1.1E-03 | 329722  | -      | -36        |
| 178  | TTATTTACA  | 1.3E-03 | 329796  | -      | 38         |

| peak | sequence  | p_value | start   | strand | bp to peak |
|------|-----------|---------|---------|--------|------------|
| 178  | ATGACCACA | 1.5E-03 | 329883  | -      | 125        |
| 178  | TTATTTACA | 1.3E-03 | 329895  | -      | 137        |
| 179  | TTTTGAACA | 9.6E-04 | 1553712 | +      | -63        |
| 179  | TCTTCCACA | 3.4E-04 | 1553769 | -      | -6         |
| 180  | TCACTCACA | 1.4E-03 | 3826837 | +      | -210       |
| 180  | ATGTCCACA | 9.3E-05 | 3826964 | +      | -83        |
| 180  | TTAATCACA | 4.3E-04 | 3827052 | -      | 5          |
| 180  | TTGTAAACA | 4.6E-04 | 3827147 | +      | 100        |
| 180  | TTATGCACA | 5.9E-05 | 3827228 | -      | 181        |
| 180  | TTATTCACG | 8.7E-04 | 3827436 | -      | 389        |
| 181  | TCATAAACA | 1.1E-03 | 2135891 | +      | -141       |
| 181  | TTATAAACA | 2.0E-04 | 2135999 | +      | -33        |
| 181  | ATTTCAACA | 7.0E-04 | 2136020 | +      | -12        |
| 181  | TCATAAACA | 1.1E-03 | 2136033 | +      | 1          |
| 181  | GTATAAACA | 1.3E-03 | 2136164 | +      | 132        |
| 181  | ATTTACACA | 1.4E-03 | 2136265 | +      | 233        |
| 181  | GTATGAACA | 1.3E-03 | 2136366 | -      | 334        |
| 182  | TTGTTTACA | 4.3E-05 | 3964981 | +      | -334       |
| 182  | GCATCCACA | 4.9E-04 | 3965273 | -      | -42        |
| 182  | TTATTCACC | 8.7E-04 | 3965299 | +      | -16        |
| 182  | TTATCAACA | 2.3E-05 | 3965326 | +      | 11         |
| 183  | TTTCTCACA | 1.3E-03 | 2349975 | -      | -392       |
| 183  | TTATACACA | 5.9E-05 | 2350359 | +      | -8         |
| 183  | TTATGCACT | 9.6E-04 | 2350516 | +      | 149        |
| 184  | ATATCAACA | 1.3E-04 | 1501991 | -      | -36        |
| 184  | GTATACACA | 5.2E-04 | 1502000 | -      | -27        |
| 184  | GTATAAACA | 1.3E-03 | 1502099 | +      | 72         |
| 184  | TTGTTCCCA | 6.2E-04 | 1502239 | -      | 212        |
| 185  | CCGTTTACA | 1.4E-03 | 4041268 | -      | -289       |
| 185  | CTGTCCCCA | 1.3E-03 | 4041478 | +      | -79        |
| 185  | TTGTGCACA | 1.5E-04 | 4041553 | +      | -4         |
| 185  | TCGTTTACA | 3.4E-04 | 4041605 | -      | 48         |
| 185  | TAATGAACA | 1.4E-03 | 4041760 | -      | 203        |
| 185  | CTATGCACA | 3.4E-04 | 4041878 | +      | 321        |
| 186  | TTTTCAACA | 1.7E-04 | 1532773 | +      | -49        |
| 186  | CTATCAACA | 1.5E-04 | 1532800 | -      | -22        |
| 186  | TTATGCACA | 5.9E-05 | 1532922 | +      | 100        |
| 187  | TTATTAACA | 7.3E-05 | 2131091 | -      | -158       |
| 187  | TTTCCAACA | 1.5E-03 | 2131149 | +      | -100       |
| 187  | TAATTCACA | 2.1E-04 | 2131278 | +      | 29         |
| 187  | TTTTTAACA | 4.3E-04 | 2131350 | -      | 101        |
| 188  | CTGTTTACA | 2.6E-04 | 662555  | +      | -367       |
| 188  | TTGTTAACA | 1.7E-04 | 662916  | -      | -6         |
| 188  | TCTTCAACA | 9.6E-04 | 662939  | -      | 17         |
| 188  | CCGTTTACA | 1.4E-03 | 663027  | -      | 105        |
| 189  | TTTTCCACA | 4.3E-05 | 3433037 | +      | -7         |

| peak | sequence  | p_value | start   | strand | bp to peak |
|------|-----------|---------|---------|--------|------------|
| 189  | TCGTTAACA | 9.6E-04 | 3433154 | +      | 110        |
| 190  | AGATCAACA | 1.4E-03 | 2225860 | +      | -37        |
| 190  | TTATCAACA | 2.3E-05 | 2225908 | -      | 11         |
| 191  | TTATCGACA | 3.9E-04 | 3552100 | -      | -239       |
| 191  | GTATACACA | 5.2E-04 | 3552121 | -      | -218       |
| 191  | CTATTCACT | 1.5E-03 | 3552197 | +      | -142       |
| 191  | TTATTAACA | 7.3E-05 | 3552351 | -      | 12         |
| 191  | CTATAAACA | 9.6E-04 | 3552373 | -      | 34         |
| 191  | ATATCAACA | 1.3E-04 | 3552709 | -      | 370        |
| 192  | TAATCAACA | 2.6E-04 | 2238719 | +      | -5         |
| 193  | TTTTCAACA | 1.7E-04 | 944651  | -      | -34        |
| 194  | CTGTCCACA | 1.1E-04 | 3282448 | -      | 5          |
| 195  | TTATCAACT | 4.9E-04 | 1293690 | +      | -302       |
| 195  | TTATGCACA | 5.9E-05 | 1293985 | +      | -7         |
| 195  | ATTTACACA | 1.4E-03 | 1294015 | +      | 23         |
| 195  | TAACCCACA | 1.0E-03 | 1294164 | -      | 172        |
| 196  | AGATTCACA | 1.2E-03 | 2251869 | -      | -297       |
| 196  | TTTTGAACA | 9.6E-04 | 2251965 | +      | -201       |
| 196  | AAATCAACA | 1.1E-03 | 2251986 | -      | -180       |
| 196  | TTATTAACA | 7.3E-05 | 2252163 | +      | -3         |
| 196  | TTATAAACA | 2.0E-04 | 2252220 | +      | 54         |
| 196  | TTGCTCACA | 6.2E-04 | 2252301 | +      | 135        |
| 197  | TTTTTCCCA | 1.4E-03 | 1326847 | -      | -106       |
| 197  | CTGCCACA  | 1.2E-03 | 1326884 | +      | -69        |
| 197  | TTATCCACA | 5.3E-06 | 1326948 | -      | -5         |
| 197  | TAATGAACA | 1.4E-03 | 1326984 | +      | 31         |
| 197  | TTTTCGACA | 1.5E-03 | 1327179 | -      | 226        |
| 197  | TGTTTCACA | 1.4E-03 | 1327188 | -      | 235        |
| 198  | CCGTTTACA | 1.4E-03 | 3694078 | -      | -367       |
| 198  | TTGTCCTCA | 1.3E-03 | 3694160 | -      | -285       |
| 198  | TTGTCCACA | 9.3E-06 | 3694439 | -      | -6         |
| 198  | TTATCGACA | 3.9E-04 | 3694498 | +      | 53         |
| 198  | TTATTTACA | 1.3E-03 | 3694576 | -      | 131        |
| 199  | GCATCAACA | 1.3E-03 | 3385806 | -      | -350       |
| 199  | TTATCAACA | 2.3E-05 | 3386162 | +      | 6          |
| 199  | TTATCCACT | 1.7E-04 | 3386186 | +      | 30         |
| 200  | ATATCAACA | 1.3E-04 | 4001344 | +      | -13        |
| 200  | ATATTCACT | 1.4E-03 | 4001357 | +      | 0          |
| 200  | TTCCAACA  | 1.5E-03 | 4001410 | +      | 53         |
| 200  | TTCCAACA  | 1.5E-03 | 4001704 | +      | 347        |
| 201  | GCATTCACA | 1.1E-03 | 2190181 | -      | -240       |
| 201  | TAATACACA | 5.7E-04 | 2190343 | -      | -78        |
| 201  | TTGCTCACA | 6.2E-04 | 2190556 | -      | 135        |
| 201  | TTTTGAACA | 9.6E-04 | 2190591 | +      | 170        |
| 202  | TTTTTCACA | 1.3E-04 | 1885202 | +      | -347       |
| 202  | TCATTAACA | 4.6E-04 | 1885314 | -      | -235       |

| peak | sequence    | p_value | start   | strand | bp to peak |
|------|-------------|---------|---------|--------|------------|
| 202  | GTATACACA   | 5.2E-04 | 1885470 | +      | -79        |
| 202  | TTATCAACG   | 1.0E-03 | 1885545 | +      | -4         |
| 202  | TAAACACA    | 1.0E-03 | 1885645 | +      | 96         |
| 202  | TTATCAATA   | 1.2E-03 | 1885812 | +      | 263        |
| 203  | TAAACCACA   | 1.3E-03 | 1970674 | +      | -202       |
| 203  | TTATACACT   | 9.6E-04 | 1970979 | +      | 103        |
| 203  | TGATGCACA   | 8.1E-04 | 1971014 | -      | 138        |
| 204  | TAATGAACA   | 1.4E-03 | 2576599 | -      | -347       |
| 204  | ACATCCACA   | 2.6E-04 | 2576679 | -      | -267       |
| 204  | TTTTCGACA   | 1.5E-03 | 2576697 | -      | -249       |
| 204  | ACATCAACA   | 8.1E-04 | 2576951 | +      | 5          |
| 204  | CGATCCACA   | 6.2E-04 | 2576975 | +      | 29         |
| 204  | ATATCAACA   | 1.3E-04 | 2577018 | -      | 72         |
| 205  | TTATAAACA   | 2.0E-04 | 513884  | -      | -387       |
| 205  | TATTTTCAACA | 1.1E-03 | 513930  | +      | -341       |
| 205  | CTATTCACA   | 1.1E-04 | 514192  | -      | -79        |
| 205  | CAATTCACA   | 1.0E-03 | 514399  | +      | 128        |
| 205  | ACATCAACA   | 8.1E-04 | 514471  | -      | 200        |
| 206  | TTTTAAACA   | 1.0E-03 | 1251877 | -      | -271       |
| 206  | ATTTTCACA   | 5.7E-04 | 1252044 | -      | -104       |
| 206  | TCATTCACA   | 1.5E-04 | 1252128 | -      | -20        |
| 206  | ATTTCAACA   | 7.0E-04 | 1252523 | +      | 375        |
| 207  | ATATCCACA   | 2.8E-05 | 3104291 | -      | -7         |
| 207  | ATATCAACA   | 1.3E-04 | 3104315 | -      | 17         |
| 208  | TTCTTAACA   | 1.5E-03 | 2241302 | -      | -314       |
| 208  | TTATCAACT   | 4.9E-04 | 2241516 | +      | -100       |
| 208  | TTAATCACA   | 4.3E-04 | 2241611 | -      | -5         |
| 208  | AAATTCACA   | 9.6E-04 | 2241836 | -      | 220        |
| 209  | TCGTTCACA   | 3.4E-04 | 1413887 | -      | -284       |
| 209  | TTGTAAACA   | 4.6E-04 | 1414148 | -      | -23        |
| 209  | TAATGCACA   | 5.2E-04 | 1414175 | +      | 4          |
| 210  | CAATCAACA   | 1.2E-03 | 592260  | -      | -126       |
| 210  | ATTTTAACA   | 1.5E-03 | 592312  | -      | -74        |
| 210  | CTATACACA   | 3.4E-04 | 592332  | -      | -54        |
| 210  | ATGTCAACA   | 2.9E-04 | 592394  | -      | 8          |
| 210  | ACTTCCACA   | 1.3E-03 | 592519  | -      | 133        |
| 210  | TTTTCAACA   | 1.7E-04 | 592608  | -      | 222        |
| 210  | TTATTAACA   | 7.3E-05 | 592770  | +      | 384        |
| 211  | TTATTCACG   | 8.7E-04 | 2148135 | -      | -216       |
| 211  | GTATACACA   | 5.2E-04 | 2148209 | -      | -142       |
| 211  | TTATCAACA   | 2.3E-05 | 2148407 | +      | 56         |
| 211  | ATAATCACA   | 1.5E-03 | 2148435 | -      | 84         |
| 212  | TTGACAACA   | 1.0E-03 | 3959869 | +      | -97        |
| 212  | TTGTCCACA   | 9.3E-06 | 3959991 | -      | 25         |
| 212  | TATTCACA    | 1.3E-03 | 3960173 | +      | 207        |
| 213  | TTTTAAACA   | 1.0E-03 | 2465624 | +      | -164       |

| peak | sequence    | p_value | start   | strand | bp to peak |
|------|-------------|---------|---------|--------|------------|
| 213  | TTATTCATA   | 1.0E-03 | 2465760 | +      | -28        |
| 213  | TTATGCACA   | 5.9E-05 | 2465782 | +      | -6         |
| 213  | TTCTTCACA   | 5.7E-04 | 2465836 | +      | 48         |
| 213  | TTATCCACC   | 3.9E-04 | 2465969 | -      | 181        |
| 214  | TTTTCCACA   | 4.3E-05 | 2197745 | -      | -20        |
| 214  | CTTTCCACA   | 2.9E-04 | 2197796 | -      | 31         |
| 214  | ATTTCCACA   | 2.3E-04 | 2198003 | +      | 238        |
| 214  | TTATTCATA   | 1.0E-03 | 2198104 | -      | 339        |
| 215  | TTATCAATA   | 1.2E-03 | 515207  | +      | -27        |
| 215  | TTTTGAACA   | 9.6E-04 | 515226  | -      | -8         |
| 215  | TAATTCACA   | 2.1E-04 | 515295  | +      | 61         |
| 215  | TTATAAACA   | 2.0E-04 | 515531  | +      | 297        |
| 216  | TGATTAACA   | 8.7E-04 | 2693602 | +      | 16         |
| 216  | TTGTCCCCA   | 2.9E-04 | 2693620 | -      | 34         |
| 216  | TTATTA ACT  | 1.0E-03 | 2693629 | -      | 43         |
| 216  | TGGTCCACA   | 2.9E-04 | 2693855 | -      | 269        |
| 216  | TTGTCTACA   | 1.3E-03 | 2693890 | -      | 304        |
| 217  | GCATCAACA   | 1.3E-03 | 3957189 | -      | -60        |
| 217  | TAATTCACA   | 2.1E-04 | 3957305 | +      | 56         |
| 217  | TATTTTCAACA | 1.1E-03 | 3957340 | +      | 91         |
| 217  | ACATCAACA   | 8.1E-04 | 3957560 | +      | 311        |
| 218  | CAATCAACA   | 1.2E-03 | 1248015 | -      | -68        |
| 218  | TAATAAACA   | 1.5E-03 | 1248031 | -      | -52        |
| 218  | TTTTCAACA   | 1.7E-04 | 1248094 | +      | 11         |
| 218  | TTGTCCACT   | 3.9E-04 | 1248208 | +      | 125        |
| 218  | TTTTGAACA   | 9.6E-04 | 1248298 | -      | 215        |
| 218  | GTGTCAACA   | 5.2E-04 | 1248417 | -      | 334        |
| 218  | TTGTCACCA   | 8.1E-04 | 1248429 | -      | 346        |
| 219  | ATATCCACA   | 2.8E-05 | 1854429 | -      | 4          |
| 219  | GTATGCACA   | 4.9E-04 | 1854534 | +      | 109        |
| 220  | ATTTTAAACA  | 1.5E-03 | 2994139 | +      | -213       |
| 220  | CCGTTTCAACA | 1.4E-03 | 2994193 | +      | -159       |
| 220  | GTATTCACA   | 2.0E-04 | 2994207 | -      | -145       |
| 220  | GTATCAACA   | 2.3E-04 | 2994358 | +      | 6          |
| 220  | ATATCAACA   | 1.3E-04 | 2994397 | +      | 45         |
| 220  | TTATCAATA   | 1.2E-03 | 2994474 | -      | 122        |
| 221  | TTATCCACG   | 3.9E-04 | 1884306 | -      | -15        |
| 221  | TTTACCACA   | 9.6E-04 | 1884411 | +      | 90         |
| 221  | TAATGAACA   | 1.4E-03 | 1884548 | -      | 227        |
| 222  | ATATTCACT   | 1.4E-03 | 1462402 | -      | -43        |
| 222  | TCATAAACA   | 1.1E-03 | 1462500 | -      | 55         |
| 222  | TTATTA ACT  | 1.0E-03 | 1462703 | +      | 258        |
| 223  | TTTTAAACA   | 1.0E-03 | 2185441 | -      | -377       |
| 223  | TTTTAAACA   | 1.0E-03 | 2185529 | -      | -289       |
| 223  | ATATGCACA   | 2.9E-04 | 2185662 | -      | -156       |
| 223  | CAATCAACA   | 1.2E-03 | 2185698 | -      | -120       |

| peak | sequence   | p_value | start   | strand | bp to peak |
|------|------------|---------|---------|--------|------------|
| 223  | TAATCAACA  | 2.6E-04 | 2185957 | +      | 139        |
| 223  | TTAGCCACA  | 8.7E-04 | 2186048 | +      | 230        |
| 223  | GTATAAACA  | 1.3E-03 | 2186206 | +      | 388        |
| 224  | TTATGAACA  | 1.9E-04 | 2250827 | +      | -97        |
| 224  | TTGTTAACA  | 1.7E-04 | 2250931 | -      | 7          |
| 225  | ATATCACCA  | 1.4E-03 | 1200695 | +      | -136       |
| 225  | TTGTCCACA  | 9.3E-06 | 1200837 | -      | 6          |
| 225  | TGACCCACA  | 1.3E-03 | 1200893 | -      | 62         |
| 225  | GTGTCAACA  | 5.2E-04 | 1201161 | -      | 330        |
| 226  | TAATGCACA  | 5.2E-04 | 1464723 | +      | -390       |
| 226  | TTATTTACA  | 1.3E-03 | 1464798 | -      | -315       |
| 226  | TTATTCAGA  | 1.4E-03 | 1464994 | -      | -119       |
| 226  | TTTTTAACA  | 4.3E-04 | 1465108 | -      | -5         |
| 226  | TTTTCCCA   | 6.2E-04 | 1465185 | +      | 72         |
| 227  | GTATTAACA  | 5.2E-04 | 1704697 | -      | 48         |
| 227  | TAATCAACA  | 2.6E-04 | 1704706 | -      | 57         |
| 227  | TTTTCAACA  | 1.7E-04 | 1705014 | +      | 365        |
| 228  | TTATTCATA  | 1.0E-03 | 3445357 | +      | -131       |
| 229  | TTATTCACA  | 1.6E-05 | 1316949 | +      | -44        |
| 229  | ACG TTCACA | 1.3E-03 | 1317012 | +      | 19         |
| 229  | TTATTCACA  | 1.6E-05 | 1317074 | -      | 81         |
| 230  | ATATAAACA  | 8.7E-04 | 937924  | +      | -358       |
| 230  | TTATAAACA  | 2.0E-04 | 937993  | -      | -289       |
| 230  | TTGTTAACA  | 1.7E-04 | 938280  | -      | -2         |
| 231  | TGATTCACA  | 3.4E-04 | 2926142 | +      | -171       |
| 231  | ATGCCCACA  | 1.1E-03 | 2926187 | -      | -126       |
| 231  | TTCTACACA  | 1.4E-03 | 2926325 | +      | 12         |
| 231  | TCATCCCA   | 7.0E-04 | 2926428 | +      | 115        |
| 231  | TTTTTCACA  | 1.3E-04 | 2926588 | +      | 275        |
| 232  | TTATGCACA  | 5.9E-05 | 2698680 | +      | 71         |
| 232  | AAATCAACA  | 1.1E-03 | 2698956 | -      | 347        |
| 233  | TTATTCACA  | 1.6E-05 | 1427359 | -      | 4          |
| 233  | ATAACCACA  | 8.1E-04 | 1427473 | +      | 118        |
| 233  | ATTTTCACA  | 5.7E-04 | 1427649 | -      | 294        |
| 234  | ATTTACACA  | 1.4E-03 | 29907   | -      | -319       |
| 234  | CTGTCAACA  | 3.4E-04 | 30131   | -      | -95        |
| 235  | TCATTCACA  | 1.5E-04 | 2367586 | +      | -370       |
| 235  | ATTTCAACA  | 7.0E-04 | 2367706 | +      | -250       |
| 235  | TCTTCAACA  | 9.6E-04 | 2367883 | +      | -73        |
| 235  | TTGTACACA  | 1.5E-04 | 2367935 | -      | -21        |
| 235  | ATATCAACA  | 1.3E-04 | 2367961 | +      | 5          |
| 235  | CTTTCAACA  | 8.1E-04 | 2368066 | +      | 110        |
| 235  | GCATCAACA  | 1.3E-03 | 2368318 | +      | 362        |
| 236  | ATATCAACA  | 1.3E-04 | 2215322 | +      | -22        |
| 236  | TGATCAACA  | 4.3E-04 | 2215544 | +      | 200        |
| 236  | TTATTCATA  | 1.0E-03 | 2215567 | +      | 223        |

| peak | sequence  | p_value | start   | strand | bp to peak |
|------|-----------|---------|---------|--------|------------|
| 237  | TCACCCACA | 7.0E-04 | 451034  | +      | -31        |
| 237  | TTATCCACT | 1.7E-04 | 451095  | -      | 30         |
| 238  | ATATGCACA | 2.9E-04 | 958674  | -      | -4         |
| 239  | TTATCCTCA | 6.2E-04 | 2154697 | -      | -250       |
| 239  | CTATTCCCA | 1.3E-03 | 2154829 | +      | -118       |
| 239  | TTATCCCCA | 1.3E-04 | 2154949 | +      | 2          |
| 239  | TGTTTCACA | 1.4E-03 | 2155233 | -      | 286        |
| 239  | TTATCCGCA | 9.6E-04 | 2155247 | +      | 300        |
| 239  | TTATCCAGA | 7.0E-04 | 2155342 | -      | 395        |
| 240  | TTGTTCACT | 8.7E-04 | 1203248 | +      | 10         |
| 240  | GTTTCCACA | 4.6E-04 | 1203313 | -      | 75         |
| 241  | GTATGAACA | 1.3E-03 | 2242203 | +      | -372       |
| 241  | TAATCCACT | 1.3E-03 | 2242397 | +      | -178       |
| 241  | TTATGAACA | 1.9E-04 | 2242572 | -      | -3         |
| 242  | TTATTCACG | 8.7E-04 | 2664602 | +      | -304       |
| 242  | TTATCCACT | 1.7E-04 | 2664632 | -      | -274       |
| 242  | CAATCCACA | 4.6E-04 | 2664889 | -      | -17        |
| 242  | CTATAAACA | 9.6E-04 | 2664955 | +      | 49         |
| 242  | TATTCAACA | 1.3E-03 | 2665140 | +      | 234        |
| 243  | TTATTGACA | 8.1E-04 | 2636781 | -      | -350       |
| 243  | TCCTCCACA | 1.3E-03 | 2636795 | +      | -336       |
| 243  | TTATTTACA | 1.3E-03 | 2637198 | +      | 67         |
| 244  | TTTTGAACA | 9.6E-04 | 805557  | +      | -306       |
| 244  | TAATCCCCA | 1.0E-03 | 805793  | -      | -70        |
| 244  | TTTCTCACA | 1.3E-03 | 806067  | -      | 204        |
| 245  | GTATCAACA | 2.3E-04 | 1840225 | +      | -137       |
| 245  | TTATTCACA | 1.6E-05 | 1840394 | -      | 32         |
| 245  | TTATACACT | 9.6E-04 | 1840433 | +      | 71         |
| 246  | TTGCTCACA | 6.2E-04 | 2829525 | -      | -184       |
| 246  | TTATCCACA | 5.3E-06 | 2829713 | +      | 4          |
| 246  | ACATCCACA | 2.6E-04 | 2829737 | +      | 28         |
| 246  | TCAACCACA | 1.0E-03 | 2829830 | +      | 121        |
| 247  | CTATCAACA | 1.5E-04 | 3126161 | -      | -340       |
| 247  | TTATACCCA | 8.1E-04 | 3126302 | +      | -199       |
| 247  | TCATCCACA | 5.9E-05 | 3126472 | +      | -29        |
| 247  | ATATGAACA | 8.1E-04 | 3126499 | -      | -2         |
| 247  | TTATTGACA | 8.1E-04 | 3126531 | -      | 30         |
| 247  | CTGTCAACA | 3.4E-04 | 3126582 | -      | 81         |
| 248  | TTCTTAACA | 1.5E-03 | 1657089 | -      | -25        |
| 248  | ATATTAACA | 3.4E-04 | 1657125 | -      | 11         |
| 248  | ATTTCAACA | 7.0E-04 | 1657141 | -      | 27         |
| 248  | TGATCAACA | 4.3E-04 | 1657448 | +      | 334        |
| 248  | TTGTCCACA | 9.3E-06 | 1657471 | +      | 357        |
| 248  | TGATCAACA | 4.3E-04 | 1657493 | -      | 379        |
| 249  | GTATTCACA | 2.0E-04 | 2126311 | -      | -8         |
| 250  | TTATCCCCA | 1.3E-04 | 639090  | -      | -47        |



| peak | sequence  | p_value | start   | strand | bp to peak |
|------|-----------|---------|---------|--------|------------|
| 250  | TCGTACACA | 8.7E-04 | 639145  | -      | 8          |
| 250  | TCTTCAACA | 9.6E-04 | 639232  | -      | 95         |
| 250  | TGTTTCACA | 1.4E-03 | 639526  | +      | 389        |
| 251  | ACATCCACA | 2.6E-04 | 507938  | -      | -2         |
| 251  | TTCTCCACA | 2.6E-04 | 508096  | -      | 156        |
| 251  | TGGTCAACA | 8.7E-04 | 508125  | +      | 185        |
| 251  | TGATACACA | 8.7E-04 | 508195  | -      | 255        |
| 252  | TCTTCCACA | 3.4E-04 | 3087587 | -      | -336       |
| 252  | TTTTAAACA | 1.0E-03 | 3087727 | -      | -196       |
| 252  | TTTTCAACA | 1.7E-04 | 3087868 | -      | -55        |
| 252  | TGTTTCACA | 1.4E-03 | 3087907 | +      | -16        |
| 252  | TCATCCACA | 5.9E-05 | 3087991 | +      | 68         |
| 252  | TTAATAACA | 1.1E-03 | 3088102 | +      | 179        |
| 252  | ATGTCAACA | 2.9E-04 | 3088282 | +      | 359        |
| 253  | TATTCACA  | 1.3E-03 | 4163764 | +      | -220       |
| 253  | ATTTCAACA | 7.0E-04 | 4163857 | +      | -127       |
| 253  | TCGCCACA  | 1.4E-03 | 4163968 | +      | -16        |
| 253  | TAGTCAACA | 5.7E-04 | 4163981 | -      | -3         |
| 253  | TTATTCACT | 4.3E-04 | 4164103 | -      | 119        |
| 253  | TTGTTAACA | 1.7E-04 | 4164127 | -      | 143        |
| 254  | TCATAAACA | 1.1E-03 | 2278993 | -      | -300       |
| 254  | TAATCAACA | 2.6E-04 | 2279256 | -      | -37        |
| 254  | TTATGAACA | 1.9E-04 | 2279356 | +      | 63         |
| 254  | TTGTCAACT | 1.0E-03 | 2279506 | -      | 213        |
| 255  | ATATTCCCA | 1.2E-03 | 2243801 | +      | -217       |
| 255  | ATGTGCACA | 6.2E-04 | 2243988 | -      | -30        |
| 255  | CTCTCCACA | 1.1E-03 | 2244008 | +      | -10        |
| 255  | AAATCCACA | 4.3E-04 | 2244172 | -      | 154        |
| 255  | ATATCGACA | 1.3E-03 | 2244376 | +      | 358        |
| 255  | TACTCACA  | 2.9E-04 | 2244409 | -      | 391        |
| 256  | TTACCCCA  | 1.3E-03 | 2084384 | +      | -89        |
| 256  | TTGTTTACA | 4.3E-05 | 2084517 | +      | 44         |
| 256  | TGATCAACA | 4.3E-04 | 2084663 | +      | 190        |
| 257  | GAATTCACA | 1.5E-03 | 2664325 | +      | -216       |
| 257  | TAATAAACA | 1.5E-03 | 2664446 | +      | -95        |
| 257  | TTATTCACG | 8.7E-04 | 2664602 | +      | 61         |
| 257  | TTATCCACT | 1.7E-04 | 2664632 | -      | 91         |
| 257  | CAATCCACA | 4.6E-04 | 2664889 | -      | 348        |
| 258  | TCTTTCACA | 8.1E-04 | 2068617 | +      | -337       |
| 258  | ATATTCACT | 1.4E-03 | 2068636 | +      | -318       |
| 258  | TAATTAACA | 6.2E-04 | 2068852 | +      | -102       |
| 258  | TTATTCACT | 4.3E-04 | 2068949 | -      | -5         |
| 258  | ATATACACA | 2.9E-04 | 2069066 | -      | 112        |
| 258  | TTGCACACA | 1.5E-03 | 2069213 | -      | 259        |
| 259  | TCATCCACT | 9.6E-04 | 2188970 | +      | -102       |
| 259  | TTAATAACA | 1.1E-03 | 2188999 | -      | -73        |

| peak | sequence  | p_value | start   | strand | bp to peak |
|------|-----------|---------|---------|--------|------------|
| 259  | CCATGCACA | 1.5E-03 | 2189129 | +      | 57         |
| 259  | CTATTCACT | 1.5E-03 | 2189186 | +      | 114        |
| 260  | TTATGCACA | 5.9E-05 | 3701569 | +      | -120       |
| 260  | TTATGCACA | 5.9E-05 | 3701689 | +      | 0          |
| 260  | TTTTCCCCA | 6.2E-04 | 3701836 | +      | 147        |
| 261  | TCATCCACA | 5.9E-05 | 353931  | -      | -4         |
| 261  | TCACCCACA | 7.0E-04 | 354150  | -      | 215        |
| 261  | TTTTCCACT | 8.7E-04 | 354221  | +      | 286        |
| 262  | TTATGAACA | 1.9E-04 | 2921278 | -      | -90        |
| 262  | CTATCCACA | 3.2E-05 | 2921374 | +      | 6          |
| 263  | TGTTCCACA | 7.0E-04 | 2144929 | -      | -345       |
| 263  | CTATGAACA | 8.7E-04 | 2144987 | -      | -287       |
| 263  | TTCTTAACA | 1.5E-03 | 2145008 | +      | -266       |
| 263  | TTGTTAACA | 1.7E-04 | 2145282 | -      | 8          |
| 264  | CTTTCAACA | 8.1E-04 | 511026  | +      | -271       |
| 264  | CTGTTCACA | 2.6E-04 | 511137  | -      | -160       |
| 264  | ATATCAACA | 1.3E-04 | 511283  | -      | -14        |
| 264  | ATATGCACA | 2.9E-04 | 511313  | -      | 16         |
| 265  | CTGTCCCCA | 1.3E-03 | 236843  | -      | -240       |
| 265  | TTGTCCACA | 9.3E-06 | 237087  | -      | 4          |
| 265  | TTCTTAACA | 1.5E-03 | 237151  | +      | 68         |
| 266  | TTGTAAACA | 4.6E-04 | 3377192 | +      | -169       |
| 266  | CTATCCACA | 3.2E-05 | 3377362 | +      | 1          |
| 266  | TTATCCAGA | 7.0E-04 | 3377375 | -      | 14         |
| 267  | TTATTCATA | 1.0E-03 | 1542498 | +      | -111       |
| 267  | TTCTTAACA | 1.5E-03 | 1542518 | +      | -91        |
| 267  | TTGTTCACA | 4.3E-05 | 1542596 | +      | -13        |
| 268  | TAATTCACA | 2.1E-04 | 2252657 | +      | -301       |
| 268  | TTTTCCACA | 4.3E-05 | 2252864 | -      | -94        |
| 268  | CCATCAACA | 8.7E-04 | 2252969 | -      | 11         |
| 268  | TGGTCAACA | 8.7E-04 | 2253112 | +      | 154        |
| 268  | CCATCCACA | 3.4E-04 | 2253194 | -      | 236        |
| 269  | ACTTCCACA | 1.3E-03 | 1890706 | -      | -223       |
| 269  | TAATTAACA | 6.2E-04 | 1890782 | -      | -147       |
| 269  | ATATCAACA | 1.3E-04 | 1890936 | +      | 7          |
