# Supplementary material for: In Vitro Whole Genome DNA Binding Analysis of the Bacterial Replication Initiator and Transcription Factor DnaA
Source: PubMed Central journal article supplement (PMC4447404; doi:10.1371/journal.pgen.1005258), 2015-05-28
Supplement: pgen.1005258.s011.pdf [file pgen.1005258.s011.pdf]

**Table S5. Primers used for qPCR.**

| genomic locus | primer name | primer sequence                   |
|---------------|-------------|-----------------------------------|
| <i>nick</i>   | clo280      | 5'-TGGCTACGTTGGCACGTATG           |
| <i>nick</i>   | clo281      | 5'-AATTGACGGCAACCTTGACC           |
| <i>iscS</i>   | oJLS018     | 5'-TTTATGAAAGCGGTACAAG            |
| <i>iscS</i>   | oJLS019     | 5'-ATGACGAAACGAACAAATC            |
| <i>yuzB</i>   | oJLS007     | 5'-TTCAGGCTAAATTGTAGG             |
| <i>yuzB</i>   | oJLS008     | 5'-CCTTTAATCCGAAGAGTATG           |
| <i>sboA</i>   | psboA1      | 5'-CCTCATAAAAAGCATTTCCT           |
| <i>sboA</i>   | psboA2      | 5'-AATTGAATCCTCCCTTTTTT           |
| <i>yjcM</i>   | oJLS016     | 5'-ATGGTGACAATGATAGAC             |
| <i>yjcM</i>   | oJLS017     | 5'-AATAAGTGCTGCCAAGAG             |
| <i>cotH</i>   | oJLS070     | 5'-CCGCTTCTGTATAATGCGTAGT         |
| <i>cotH</i>   | oJLS071     | 5'-AAACACGTGGATGTGCGATAAGT        |
| <i>ypfD</i>   | oJLS072     | 5'-GAGTGGGAAAGCTGTGAAATG          |
| <i>ypfD</i>   | oJLS073     | 5'-GGAAGTGTACTTGATGGCAAAG         |
| <i>ydiO</i>   | oJLS074     | 5'-TAGTGGATGTGGAGGTCTATCC         |
| <i>ydiO</i>   | oJLS075     | 5'-AGGCAGCTTCGTTAAGATCAC          |
| <i>yphF</i>   | oJLS076     | 5'-AGCCCTCCATTTGCCTTT             |
| <i>yphF</i>   | oJLS077     | 5'-GTGTGCATGCCATTCCTTATC          |
| <i>rplB</i>   | oJLS003     | 5'-TCATGTCAGGTCCTGAAG             |
| <i>rplB</i>   | oJLS004     | 5'-TACCAGCTGAACGTACAAGCTGTC       |
| <i>dnaA</i>   | HM126       | 5'-TATTTGTGTTTTAACTCTTGATTACTAATC |
| <i>dnaA</i>   | HM127       | 5'-TTGAAAACATATAATATAGTAGATAAATAG |
